# Supplementary material
Source: publisher figshare collection journal article supplement (https://acs.figshare.com/ndownloader/files/4042477)
Supplement: Supplementary file 1 [file 4042477]

data_2 

_publ_requested_journal   'Organometallics'
loop_
_publ_author_name
_publ_author_address

'Honz\'i\<cek, Jan'
;Institute of Chemistry and Technology of Macromolecular Materials
Faculty of Chemical Technology
University of Pardubice
Studentsk\'a 573 
Pardubice 532 10
Czech Republic
;

'Vinkl\'arek, Jarom\'ir'
;Department of General and Inorganic Chemistry
Faculty of Chemical Technology
University of Pardubice
Studentsk\'a 573 
Pardubice 532 10
Czech Republic
;

'Erben, Milan'
;Department of General and Inorganic Chemistry
Faculty of Chemical Technology
University of Pardubice
Studentsk\'a 573 
Pardubice 532 10
Czech Republic
;

'Lodinsk\'y, Jakub'
;Department of General and Inorganic Chemistry
Faculty of Chemical Technology
University of Pardubice
Studentsk\'a 573 
Pardubice 532 10
Czech Republic
;

'Dost\'al, Libor'
;Department of General and Inorganic Chemistry
Faculty of Chemical Technology
University of Pardubice
Studentsk\'a 573 
Pardubice 532 10
Czech Republic
;

'Pad\<elkov\'a, Zde\<nka'
;Department of General and Inorganic Chemistry
Faculty of Chemical Technology
University of Pardubice
Studentsk\'a 573 
Pardubice 532 10
Czech Republic
;
 
_audit_creation_method            SHELXL-97 
_chemical_name_systematic 
; 
 ? 
; 
_chemical_name_common             ? 
_chemical_melting_point           ? 
_chemical_formula_moiety          'C15 H14 Mo O2' 
_chemical_formula_sum 
 'C15 H14 Mo O2' 
_chemical_formula_weight          322.20 
 
loop_ 
 _atom_type_symbol 
 _atom_type_description 
 _atom_type_scat_dispersion_real 
 _atom_type_scat_dispersion_imag 
 _atom_type_scat_source 
 'C'  'C'   0.0033   0.0016 
 'International Tables Vol C Tables 4.2.6.8 and 6.1.1.4' 
 'H'  'H'   0.0000   0.0000 
 'International Tables Vol C Tables 4.2.6.8 and 6.1.1.4' 
 'O'  'O'   0.0106   0.0060 
 'International Tables Vol C Tables 4.2.6.8 and 6.1.1.4' 
 'Mo'  'Mo'  -1.6832   0.6857 
 'International Tables Vol C Tables 4.2.6.8 and 6.1.1.4' 
 
_symmetry_cell_setting            'monoclinic' 
_symmetry_space_group_name_H-M    'P 21/c' 
_symmetry_space_group_name_Hall   '-P 2ybc'
 
loop_ 
 _symmetry_equiv_pos_as_xyz 
 'x, y, z' 
 '-x, y+1/2, -z+1/2' 
 '-x, -y, -z' 
 'x, -y-1/2, z-1/2' 
 
_cell_length_a                    10.5381(8) 
_cell_length_b                    9.2048(7) 
_cell_length_c                    13.2120(5) 
_cell_angle_alpha                 90 
_cell_angle_beta                  93.336(4) 
_cell_angle_gamma                 90 
_cell_volume                      1279.41(15) 
_cell_formula_units_Z             4 
_cell_measurement_temperature     150(1) 
_cell_measurement_reflns_used     9932 
_cell_measurement_theta_min       1 
_cell_measurement_theta_max       27.5 
 
_exptl_crystal_description        'block' 
_exptl_crystal_colour             'yellow' 
_exptl_crystal_size_max           0.21 
_exptl_crystal_size_mid           0.11 
_exptl_crystal_size_min           0.11 
_exptl_crystal_density_meas       ? 
_exptl_crystal_density_diffrn     1.673 
_exptl_crystal_density_method     'not measured' 
_exptl_crystal_F_000              648 
_exptl_absorpt_coefficient_mu     1.015 
# Absorption correction 

loop_
_exptl_crystal_face_index_h 
_exptl_crystal_face_index_k 
_exptl_crystal_face_index_l 
_exptl_crystal_face_perp_dist 
    0    1    0  0.054
    0   -1    0  0.014
    0    0   -1  0.077
    0    0    1  0.105
    1    0    0  0.057
   -1    0    0  0.055
   -1    0    1  0.084
    0    1    1  0.065


_exptl_absorpt_correction_type 'integration' 
_exptl_absorpt_correction_T_min  0.882
_exptl_absorpt_correction_T_max  0.936
_exptl_absorpt_process_details
;
Gaussian integration (Coppens, 1970)
; 
 
_diffrn_ambient_temperature       150(1) 
_diffrn_radiation_wavelength      0.71073 
_diffrn_radiation_type            MoK\a 
_diffrn_radiation_source          'fine-focus sealed tube' 
_diffrn_radiation_monochromator   graphite 
_diffrn_measurement_device_type   'Bruker Nonius KappaCCD area detector' 
_diffrn_measurement_method        '\f and \w scans to fill the Ewald sphere'  
_diffrn_detector_area_resol_mean  9.091
_diffrn_standards_number          0 
_diffrn_standards_interval_count  ? 
_diffrn_standards_interval_time   ? 
_diffrn_standards_decay_%         ? 
_diffrn_reflns_number             9864 
_diffrn_reflns_av_R_equivalents   0.0470 
_diffrn_reflns_av_sigmaI/netI     0.0426 
_diffrn_reflns_limit_h_min        -13 
_diffrn_reflns_limit_h_max        13 
_diffrn_reflns_limit_k_min        -11 
_diffrn_reflns_limit_k_max        11 
_diffrn_reflns_limit_l_min        -17 
_diffrn_reflns_limit_l_max        17 
_diffrn_reflns_theta_min          2.94 
_diffrn_reflns_theta_max          27.50 
_reflns_number_total              2911 
_reflns_number_gt                 2364 
_reflns_threshold_expression      >2sigma(I) 
 
_computing_data_collection        
'COLLECT (Hooft, 1998) and DENZO (Otwinowski & Minor, 1997)'
_computing_cell_refinement        'COLLECT and DENZO' 
_computing_data_reduction         'COLLECT and DENZO' 
_computing_structure_solution     'SIR92 (Altomare et al., 1994)' 
_computing_structure_refinement   'SHELXL-97 (Sheldrick, 1997)' 
_computing_molecular_graphics     'PLATON (Spek, 2003)'
_computing_publication_material   'SHELXL-97 (Sheldrick, 2008)' 
 
_refine_special_details 
;
 Refinement of F^2^ against ALL reflections.  The weighted R-factor wR and 
 goodness of fit S are based on F^2^, conventional R-factors R are based 
 on F, with F set to zero for negative F^2^. The threshold expression of 
 F^2^ > 2sigma(F^2^) is used only for calculating R-factors(gt) etc. and is 
 not relevant to the choice of reflections for refinement.  R-factors based 
 on F^2^ are statistically about twice as large as those based on F, and R- 
 factors based on ALL data will be even larger. 
; 
 
_refine_ls_structure_factor_coef  Fsqd  
_refine_ls_matrix_type            full 
_refine_ls_weighting_scheme       calc  
_refine_ls_weighting_details 
 'calc w=1/[\s^2^(Fo^2^)+(0.0243P)^2^+1.6374P] where P=(Fo^2^+2Fc^2^)/3' 
_atom_sites_solution_primary      direct 
_atom_sites_solution_secondary    difmap 
_atom_sites_solution_hydrogens    geom 
_refine_ls_hydrogen_treatment     constr 
_refine_ls_extinction_method      none 
_refine_ls_extinction_coef        ? 
_refine_ls_number_reflns          2911 
_refine_ls_number_parameters      163 
_refine_ls_number_restraints      0 
_refine_ls_R_factor_all           0.0530 
_refine_ls_R_factor_gt            0.0351 
_refine_ls_wR_factor_ref          0.0742 
_refine_ls_wR_factor_gt           0.0672 
_refine_ls_goodness_of_fit_ref    1.111 
_refine_ls_restrained_S_all       1.111 
_refine_ls_shift/su_max           0.001 
_refine_ls_shift/su_mean          0.000 
 
loop_ 
 _atom_site_label 
 _atom_site_type_symbol 
 _atom_site_fract_x 
 _atom_site_fract_y 
 _atom_site_fract_z 
 _atom_site_U_iso_or_equiv 
 _atom_site_adp_type 
 _atom_site_occupancy 
 _atom_site_symmetry_multiplicity 
 _atom_site_calc_flag 
 _atom_site_refinement_flags 
 _atom_site_disorder_assembly 
 _atom_site_disorder_group 
Mo1 Mo 0.78685(2) 0.27173(3) 0.10695(2) 0.01662(9) Uani 1 1 d . . . 
C4 C 0.4629(3) 0.2264(4) 0.0963(3) 0.0237(7) Uani 1 1 d . . . 
H4 H 0.4231 0.2369 0.0320 0.028 Uiso 1 1 d R . . 
C15 C 0.9646(3) 0.2788(4) 0.1536(3) 0.0255(7) Uani 1 1 d . . . 
O1 O 0.9175(3) 0.3310(3) -0.09290(19) 0.0384(6) Uani 1 1 d . . . 
C14 C 0.8676(3) 0.3084(4) -0.0192(3) 0.0256(7) Uani 1 1 d . . . 
O2 O 1.0716(2) 0.2836(3) 0.1782(2) 0.0385(6) Uani 1 1 d . . . 
C8 C 0.6418(3) 0.1399(3) 0.2090(2) 0.0195(6) Uani 1 1 d . . . 
C1 C 0.7647(3) 0.0189(3) 0.0970(3) 0.0220(7) Uani 1 1 d . . . 
C7 C 0.5833(3) 0.2024(4) 0.2932(2) 0.0251(7) Uani 1 1 d . . . 
H7 H 0.6222 0.1965 0.3581 0.030 Uiso 1 1 d R . . 
C6 C 0.4689(3) 0.2704(4) 0.2773(3) 0.0284(7) Uani 1 1 d . . . 
H6 H 0.4299 0.3104 0.3322 0.034 Uiso 1 1 d R . . 
C9 C 0.7567(3) 0.0606(3) 0.1995(2) 0.0209(7) Uani 1 1 d . . . 
H9 H 0.8164 0.0395 0.2520 0.025 Uiso 1 1 d R . . 
C5 C 0.4084(3) 0.2814(4) 0.1794(3) 0.0267(7) Uani 1 1 d . . . 
H5 H 0.3297 0.3270 0.1716 0.032 Uiso 1 1 d R . . 
C2 C 0.6601(3) 0.0819(3) 0.0400(2) 0.0209(7) Uani 1 1 d . . . 
H2 H 0.6458 0.0778 -0.0301 0.025 Uiso 1 1 d R . . 
C3 C 0.5808(3) 0.1531(3) 0.1092(2) 0.0181(6) Uani 1 1 d . . . 
C10 C 0.8598(3) -0.0844(4) 0.0568(3) 0.0328(8) Uani 1 1 d . . . 
H10A H 0.9424 -0.0646 0.0882 0.039 Uiso 1 1 d R . . 
H10B H 0.8619 -0.0724 -0.0153 0.039 Uiso 1 1 d R . . 
H10C H 0.8358 -0.1824 0.0717 0.039 Uiso 1 1 d R . . 
C11 C 0.7090(4) 0.4939(4) 0.0472(3) 0.0366(9) Uani 1 1 d . . . 
H11A H 0.7700 0.5610 0.0210 0.044 Uiso 1 1 d R . . 
H11B H 0.6276 0.4928 0.0090 0.044 Uiso 1 1 d R . . 
C13 C 0.8131(4) 0.4709(4) 0.2152(3) 0.0417(10) Uani 1 1 d . . . 
H13A H 0.8002 0.4550 0.2864 0.050 Uiso 1 1 d R . . 
H13B H 0.8828 0.5361 0.2028 0.050 Uiso 1 1 d R . . 
C12 C 0.7069(4) 0.4824(4) 0.1509(3) 0.0414(10) Uani 1 1 d . . . 
H12 H 0.6282 0.4817 0.1793 0.050 Uiso 1 1 d R . . 
 
loop_ 
 _atom_site_aniso_label 
 _atom_site_aniso_U_11 
 _atom_site_aniso_U_22 
 _atom_site_aniso_U_33 
 _atom_site_aniso_U_23 
 _atom_site_aniso_U_13 
 _atom_site_aniso_U_12 
Mo1 0.01632(14) 0.01328(14) 0.02014(14) -0.00033(11) -0.00001(9) -0.00030(11) 
C4 0.0221(16) 0.0190(16) 0.0291(16) -0.0003(14) -0.0055(12) -0.0020(13) 
C15 0.0285(18) 0.0188(16) 0.0288(17) 0.0017(14) -0.0011(13) 0.0000(14) 
O1 0.0371(15) 0.0473(17) 0.0319(14) 0.0115(12) 0.0113(12) 0.0066(13) 
C14 0.0238(17) 0.0213(18) 0.0314(18) 0.0027(14) -0.0015(14) 0.0022(13) 
O2 0.0211(13) 0.0397(16) 0.0533(17) -0.0030(13) -0.0088(11) -0.0025(11) 
C8 0.0190(16) 0.0161(16) 0.0238(16) 0.0036(12) 0.0034(12) -0.0035(12) 
C1 0.0220(17) 0.0086(15) 0.0354(19) -0.0001(13) 0.0031(14) -0.0012(12) 
C7 0.0285(18) 0.0247(19) 0.0221(16) 0.0027(13) 0.0020(13) -0.0019(14) 
C6 0.0329(19) 0.0266(18) 0.0267(17) -0.0038(14) 0.0110(13) 0.0016(15) 
C9 0.0221(16) 0.0155(16) 0.0246(16) 0.0046(13) -0.0025(13) -0.0005(12) 
C5 0.0169(15) 0.0231(17) 0.0402(19) 0.0020(15) 0.0032(13) 0.0030(13) 
C2 0.0223(16) 0.0165(16) 0.0234(17) -0.0027(12) -0.0015(13) -0.0049(13) 
C3 0.0167(15) 0.0146(16) 0.0229(15) 0.0005(12) -0.0006(12) -0.0026(12) 
C10 0.0293(19) 0.0227(19) 0.047(2) -0.0056(16) 0.0113(16) 0.0011(15) 
C11 0.044(2) 0.0191(19) 0.046(2) 0.0052(16) -0.0035(18) 0.0064(16) 
C13 0.054(3) 0.027(2) 0.044(2) -0.0158(17) -0.0028(19) -0.0015(18) 
C12 0.046(2) 0.020(2) 0.058(3) -0.0063(18) 0.006(2) 0.0050(17) 
 
_geom_special_details 
; 
 All esds (except the esd in the dihedral angle between two l.s. planes) 
 are estimated using the full covariance matrix.  The cell esds are taken 
 into account individually in the estimation of esds in distances, angles 
 and torsion angles; correlations between esds in cell parameters are only 
 used when they are defined by crystal symmetry.  An approximate (isotropic) 
 treatment of cell esds is used for estimating esds involving l.s. planes. 
; 
 
loop_ 
 _geom_bond_atom_site_label_1 
 _geom_bond_atom_site_label_2 
 _geom_bond_distance 
 _geom_bond_site_symmetry_2 
 _geom_bond_publ_flag 
Mo1 C15 1.939(3) . ? 
Mo1 C14 1.945(4) . ? 
Mo1 C12 2.205(4) . ? 
Mo1 C11 2.325(4) . ? 
Mo1 C9 2.328(3) . ? 
Mo1 C13 2.332(4) . ? 
Mo1 C2 2.342(3) . ? 
Mo1 C1 2.342(3) . ? 
Mo1 C8 2.423(3) . ? 
Mo1 C3 2.432(3) . ? 
C4 C5 1.366(5) . ? 
C4 C3 1.415(4) . ? 
C4 H4 0.9299 . ? 
C15 O2 1.156(4) . ? 
O1 C14 1.152(4) . ? 
C8 C7 1.424(4) . ? 
C8 C9 1.426(4) . ? 
C8 C3 1.438(4) . ? 
C1 C9 1.414(5) . ? 
C1 C2 1.423(4) . ? 
C1 C10 1.501(5) . ? 
C7 C6 1.364(5) . ? 
C7 H7 0.9300 . ? 
C6 C5 1.412(5) . ? 
C6 H6 0.9299 . ? 
C9 H9 0.9300 . ? 
C5 H5 0.9299 . ? 
C2 C3 1.433(4) . ? 
C2 H2 0.9300 . ? 
C10 H10A 0.9599 . ? 
C10 H10B 0.9600 . ? 
C10 H10C 0.9600 . ? 
C11 C12 1.376(6) . ? 
C11 H11A 0.9700 . ? 
C11 H11B 0.9700 . ? 
C13 C12 1.369(5) . ? 
C13 H13A 0.9701 . ? 
C13 H13B 0.9700 . ? 
C12 H12 0.9299 . ? 
 
loop_ 
 _geom_angle_atom_site_label_1 
 _geom_angle_atom_site_label_2 
 _geom_angle_atom_site_label_3 
 _geom_angle 
 _geom_angle_site_symmetry_1 
 _geom_angle_site_symmetry_3 
 _geom_angle_publ_flag 
C15 Mo1 C14 78.67(14) . . ? 
C15 Mo1 C12 105.29(15) . . ? 
C14 Mo1 C12 105.41(15) . . ? 
C15 Mo1 C11 113.19(14) . . ? 
C14 Mo1 C11 73.70(14) . . ? 
C12 Mo1 C11 35.23(14) . . ? 
C15 Mo1 C9 91.16(13) . . ? 
C14 Mo1 C9 132.47(13) . . ? 
C12 Mo1 C9 122.00(14) . . ? 
C11 Mo1 C9 148.94(13) . . ? 
C15 Mo1 C13 72.59(15) . . ? 
C14 Mo1 C13 110.29(15) . . ? 
C12 Mo1 C13 34.98(14) . . ? 
C11 Mo1 C13 62.83(14) . . ? 
C9 Mo1 C13 110.45(14) . . ? 
C15 Mo1 C2 131.65(13) . . ? 
C14 Mo1 C2 94.26(13) . . ? 
C12 Mo1 C2 122.49(14) . . ? 
C11 Mo1 C2 110.23(13) . . ? 
C9 Mo1 C2 58.87(11) . . ? 
C13 Mo1 C2 149.67(14) . . ? 
C15 Mo1 C1 98.19(13) . . ? 
C14 Mo1 C1 99.90(13) . . ? 
C12 Mo1 C1 148.22(14) . . ? 
C11 Mo1 C1 145.41(13) . . ? 
C9 Mo1 C1 35.25(11) . . ? 
C13 Mo1 C1 145.45(14) . . ? 
C2 Mo1 C1 35.36(11) . . ? 
C15 Mo1 C8 117.99(12) . . ? 
C14 Mo1 C8 152.38(12) . . ? 
C12 Mo1 C8 91.76(14) . . ? 
C11 Mo1 C8 114.08(13) . . ? 
C9 Mo1 C8 34.86(11) . . ? 
C13 Mo1 C8 96.23(14) . . ? 
C2 Mo1 C8 58.13(11) . . ? 
C1 Mo1 C8 57.94(11) . . ? 
C15 Mo1 C3 149.09(12) . . ? 
C14 Mo1 C3 121.61(12) . . ? 
C12 Mo1 C3 92.08(13) . . ? 
C11 Mo1 C3 95.82(12) . . ? 
C9 Mo1 C3 57.95(11) . . ? 
C13 Mo1 C3 114.80(14) . . ? 
C2 Mo1 C3 34.87(11) . . ? 
C1 Mo1 C3 57.89(11) . . ? 
C8 Mo1 C3 34.46(10) . . ? 
C5 C4 C3 119.1(3) . . ? 
C5 C4 H4 120.5 . . ? 
C3 C4 H4 120.4 . . ? 
O2 C15 Mo1 177.8(3) . . ? 
O1 C14 Mo1 178.7(3) . . ? 
C7 C8 C9 133.2(3) . . ? 
C7 C8 C3 119.4(3) . . ? 
C9 C8 C3 107.4(3) . . ? 
C7 C8 Mo1 123.3(2) . . ? 
C9 C8 Mo1 68.92(17) . . ? 
C3 C8 Mo1 73.15(17) . . ? 
C9 C1 C2 108.0(3) . . ? 
C9 C1 C10 126.1(3) . . ? 
C2 C1 C10 125.7(3) . . ? 
C9 C1 Mo1 71.81(18) . . ? 
C2 C1 Mo1 72.30(17) . . ? 
C10 C1 Mo1 125.6(2) . . ? 
C6 C7 C8 119.0(3) . . ? 
C6 C7 H7 120.5 . . ? 
C8 C7 H7 120.6 . . ? 
C7 C6 C5 121.4(3) . . ? 
C7 C6 H6 119.2 . . ? 
C5 C6 H6 119.3 . . ? 
C1 C9 C8 108.8(3) . . ? 
C1 C9 Mo1 72.94(17) . . ? 
C8 C9 Mo1 76.21(18) . . ? 
C1 C9 H9 125.5 . . ? 
C8 C9 H9 125.7 . . ? 
Mo1 C9 H9 117.3 . . ? 
C4 C5 C6 121.4(3) . . ? 
C4 C5 H5 119.5 . . ? 
C6 C5 H5 119.1 . . ? 
C1 C2 C3 108.1(3) . . ? 
C1 C2 Mo1 72.34(17) . . ? 
C3 C2 Mo1 76.02(17) . . ? 
C1 C2 H2 125.9 . . ? 
C3 C2 H2 126.0 . . ? 
Mo1 C2 H2 117.5 . . ? 
C4 C3 C2 132.9(3) . . ? 
C4 C3 C8 119.6(3) . . ? 
C2 C3 C8 107.5(3) . . ? 
C4 C3 Mo1 124.2(2) . . ? 
C2 C3 Mo1 69.11(17) . . ? 
C8 C3 Mo1 72.40(17) . . ? 
C1 C10 H10A 109.5 . . ? 
C1 C10 H10B 109.5 . . ? 
H10A C10 H10B 109.5 . . ? 
C1 C10 H10C 109.5 . . ? 
H10A C10 H10C 109.5 . . ? 
H10B C10 H10C 109.5 . . ? 
C12 C11 Mo1 67.6(2) . . ? 
C12 C11 H11A 117.0 . . ? 
Mo1 C11 H11A 117.0 . . ? 
C12 C11 H11B 116.9 . . ? 
Mo1 C11 H11B 116.9 . . ? 
H11A C11 H11B 114.0 . . ? 
C12 C13 Mo1 67.5(2) . . ? 
C12 C13 H13A 117.3 . . ? 
Mo1 C13 H13A 117.3 . . ? 
C12 C13 H13B 116.5 . . ? 
Mo1 C13 H13B 116.6 . . ? 
H13A C13 H13B 114.0 . . ? 
C13 C12 C11 124.3(4) . . ? 
C13 C12 Mo1 77.6(2) . . ? 
C11 C12 Mo1 77.1(2) . . ? 
C13 C12 H12 117.7 . . ? 
C11 C12 H12 118.0 . . ? 
Mo1 C12 H12 117.7 . . ? 
 
_diffrn_measured_fraction_theta_max    0.990 
_diffrn_reflns_theta_full              27.50 
_diffrn_measured_fraction_theta_full   0.990 
_refine_diff_density_max    0.946 
_refine_diff_density_min   -0.498 
_refine_diff_density_rms    0.108 
#===END
 
data_3 

_audit_creation_method            SHELXL-97 
_chemical_name_systematic 
; 
 ? 
; 
_chemical_name_common             ? 
_chemical_melting_point           ? 
_chemical_formula_moiety          'C16 H16 Mo O2' 
_chemical_formula_sum 
 'C16 H16 Mo O2' 
_chemical_formula_weight          336.23 
 
loop_ 
 _atom_type_symbol 
 _atom_type_description 
 _atom_type_scat_dispersion_real 
 _atom_type_scat_dispersion_imag 
 _atom_type_scat_source 
 'C'  'C'   0.0033   0.0016 
 'International Tables Vol C Tables 4.2.6.8 and 6.1.1.4' 
 'H'  'H'   0.0000   0.0000 
 'International Tables Vol C Tables 4.2.6.8 and 6.1.1.4' 
 'O'  'O'   0.0106   0.0060 
 'International Tables Vol C Tables 4.2.6.8 and 6.1.1.4' 
 'Mo'  'Mo'  -1.6832   0.6857 
 'International Tables Vol C Tables 4.2.6.8 and 6.1.1.4' 
 
_symmetry_cell_setting            'monoclinic' 
_symmetry_space_group_name_H-M    'P 21/c' 
_symmetry_space_group_name_Hall   '-P 2ybc' 
 
loop_ 
 _symmetry_equiv_pos_as_xyz 
 'x, y, z' 
 '-x, y+1/2, -z+1/2' 
 '-x, -y, -z' 
 'x, -y-1/2, z-1/2' 
 
_cell_length_a                    9.2720(4) 
_cell_length_b                    13.5779(6) 
_cell_length_c                    12.6011(6) 
_cell_angle_alpha                 90 
_cell_angle_beta                  118.000(4) 
_cell_angle_gamma                 90 
_cell_volume                      1400.71(12) 
_cell_formula_units_Z             4 
_cell_measurement_temperature     150(1) 
_cell_measurement_reflns_used     13760 
_cell_measurement_theta_min       1 
_cell_measurement_theta_max       27.5 
 
_exptl_crystal_description        'block' 
_exptl_crystal_colour             'yellow' 
_exptl_crystal_size_max           0.25 
_exptl_crystal_size_mid           0.24 
_exptl_crystal_size_min           0.16 
_exptl_crystal_density_meas       ? 
_exptl_crystal_density_diffrn     1.594 
_exptl_crystal_density_method     'not measured' 
_exptl_crystal_F_000              680 
_exptl_absorpt_coefficient_mu     0.931 
# Absorption correction 

loop_
_exptl_crystal_face_index_h 
_exptl_crystal_face_index_k 
_exptl_crystal_face_index_l 
_exptl_crystal_face_perp_dist 
   -1    0    0  0.048
    1    0    0  0.111
    0    0    1  0.107
    0    0   -1  0.031
    0    1    0  0.074
    0   -1    0  0.122
    0    1    1  0.075
    0   -1   -1  0.085
   -1    0    1  0.085
    1    0   -1  0.055


_exptl_absorpt_correction_type 'integration' 
_exptl_absorpt_correction_T_min  0.857
_exptl_absorpt_correction_T_max  0.912
_exptl_absorpt_process_details
;
Gaussian integration (Coppens, 1970)
;
 
_diffrn_ambient_temperature       150(1) 
_diffrn_radiation_wavelength      0.71073 
_diffrn_radiation_type            MoK\a 
_diffrn_radiation_source          'fine-focus sealed tube' 
_diffrn_radiation_monochromator   graphite 
_diffrn_measurement_device_type   'Bruker Nonius KappaCCD area detector' 
_diffrn_measurement_method        '\f and \w scans to fill the Ewald sphere'  
_diffrn_detector_area_resol_mean  9.091
_diffrn_standards_number          0
_diffrn_standards_interval_count  ? 
_diffrn_standards_interval_time   ? 
_diffrn_standards_decay_%         ? 
_diffrn_reflns_number             13701 
_diffrn_reflns_av_R_equivalents   0.0438 
_diffrn_reflns_av_sigmaI/netI     0.0338 
_diffrn_reflns_limit_h_min        -11 
_diffrn_reflns_limit_h_max        12 
_diffrn_reflns_limit_k_min        -17 
_diffrn_reflns_limit_k_max        17 
_diffrn_reflns_limit_l_min        -16 
_diffrn_reflns_limit_l_max        12 
_diffrn_reflns_theta_min          2.37 
_diffrn_reflns_theta_max          27.50 
_reflns_number_total              3195 
_reflns_number_gt                 2586 
_reflns_threshold_expression      >2sigma(I) 
 
_computing_data_collection        
'COLLECT (Hooft, 1998) and DENZO (Otwinowski & Minor, 1997)'
_computing_cell_refinement        'COLLECT and DENZO' 
_computing_data_reduction         'COLLECT and DENZO' 
_computing_structure_solution     'SIR92 (Altomare et al., 1994)' 
_computing_structure_refinement   'SHELXL-97 (Sheldrick, 1997)' 
_computing_molecular_graphics     'PLATON (Spek, 2003)'
_computing_publication_material   'SHELXL-97 (Sheldrick, 2008)' 
 
_refine_special_details 
; 
 Refinement of F^2^ against ALL reflections.  The weighted R-factor wR and 
 goodness of fit S are based on F^2^, conventional R-factors R are based 
 on F, with F set to zero for negative F^2^. The threshold expression of 
 F^2^ > 2sigma(F^2^) is used only for calculating R-factors(gt) etc. and is 
 not relevant to the choice of reflections for refinement.  R-factors based 
 on F^2^ are statistically about twice as large as those based on F, and R- 
 factors based on ALL data will be even larger. 
; 
 
_refine_ls_structure_factor_coef  Fsqd  
_refine_ls_matrix_type            full 
_refine_ls_weighting_scheme       calc  
_refine_ls_weighting_details 
 'calc w=1/[\s^2^(Fo^2^)+(0.0312P)^2^+2.2262P] where P=(Fo^2^+2Fc^2^)/3' 
_atom_sites_solution_primary      direct 
_atom_sites_solution_secondary    difmap 
_atom_sites_solution_hydrogens    geom 
_refine_ls_hydrogen_treatment     constr 
_refine_ls_extinction_method      none 
_refine_ls_extinction_coef        ? 
_refine_ls_number_reflns          3195 
_refine_ls_number_parameters      172 
_refine_ls_number_restraints      0 
_refine_ls_R_factor_all           0.0505 
_refine_ls_R_factor_gt            0.0344 
_refine_ls_wR_factor_ref          0.0809 
_refine_ls_wR_factor_gt           0.0731 
_refine_ls_goodness_of_fit_ref    1.102 
_refine_ls_restrained_S_all       1.102 
_refine_ls_shift/su_max           0.000 
_refine_ls_shift/su_mean          0.000 
 
loop_ 
 _atom_site_label 
 _atom_site_type_symbol 
 _atom_site_fract_x 
 _atom_site_fract_y 
 _atom_site_fract_z 
 _atom_site_U_iso_or_equiv 
 _atom_site_adp_type 
 _atom_site_occupancy 
 _atom_site_symmetry_multiplicity 
 _atom_site_calc_flag 
 _atom_site_refinement_flags 
 _atom_site_disorder_assembly 
 _atom_site_disorder_group 
Mo1 Mo 0.08957(3) 0.12326(2) 0.26277(2) 0.01881(9) Uani 1 1 d . . . 
C16 C -0.0678(4) 0.2049(2) 0.2831(3) 0.0243(7) Uani 1 1 d . . . 
O2 O -0.1605(3) 0.25369(18) 0.2962(2) 0.0338(6) Uani 1 1 d . . . 
C14 C 0.0997(6) 0.2786(3) 0.1890(4) 0.0435(10) Uani 1 1 d . . . 
H14A H -0.0034 0.3081 0.1326 0.052 Uiso 1 1 d R . . 
H14B H 0.1772 0.3250 0.2457 0.052 Uiso 1 1 d R . . 
C5 C 0.3643(4) 0.1258(2) 0.4297(3) 0.0220(6) Uani 1 1 d . . . 
C9 C 0.3545(4) 0.0421(2) 0.3570(3) 0.0216(6) Uani 1 1 d . . . 
C2 C 0.5689(4) 0.1091(3) 0.3263(3) 0.0285(7) Uani 1 1 d . . . 
H2 H 0.6400 0.1053 0.2934 0.034 Uiso 1 1 d R . . 
O1 O -0.2263(3) 0.0068(2) 0.1008(3) 0.0422(7) Uani 1 1 d . . . 
C3 C 0.5762(4) 0.1925(3) 0.3966(3) 0.0280(7) Uani 1 1 d . . . 
H3 H 0.6526 0.2413 0.4085 0.034 Uiso 1 1 d R . . 
C6 C 0.2443(4) 0.1127(2) 0.4697(3) 0.0258(7) Uani 1 1 d . . . 
H6 H 0.2201 0.1570 0.5154 0.031 Uiso 1 1 d R . . 
C8 C 0.2280(4) -0.0215(2) 0.3525(3) 0.0247(7) Uani 1 1 d . . . 
H8 H 0.1917 -0.0796 0.3087 0.030 Uiso 1 1 d R . . 
C15 C -0.1083(4) 0.0515(2) 0.1593(3) 0.0275(7) Uani 1 1 d . . . 
C4 C 0.4766(4) 0.2039(2) 0.4480(3) 0.0261(7) Uani 1 1 d . . . 
C1 C 0.4598(4) 0.0342(2) 0.3039(3) 0.0249(7) Uani 1 1 d . . . 
C10 C 0.4494(5) -0.0538(3) 0.2287(3) 0.0343(8) Uani 1 1 d . . . 
H10A H 0.5277 -0.0470 0.1995 0.041 Uiso 1 1 d R . . 
H10B H 0.3415 -0.0579 0.1618 0.041 Uiso 1 1 d R . . 
H10C H 0.4722 -0.1126 0.2761 0.041 Uiso 1 1 d R . . 
C7 C 0.1673(4) 0.0209(3) 0.4262(3) 0.0273(7) Uani 1 1 d . . . 
H7 H 0.0903 -0.0077 0.4442 0.033 Uiso 1 1 d R . . 
C12 C 0.0778(5) 0.1314(3) 0.0743(3) 0.0393(9) Uani 1 1 d . . . 
H12A H 0.1396 0.0824 0.0566 0.047 Uiso 1 1 d R . . 
H12B H -0.0272 0.1472 0.0066 0.047 Uiso 1 1 d R . . 
C11 C 0.4797(5) 0.2922(3) 0.5205(3) 0.0349(8) Uani 1 1 d . . . 
H11A H 0.5549 0.3400 0.5189 0.042 Uiso 1 1 d R . . 
H11B H 0.5138 0.2725 0.6021 0.042 Uiso 1 1 d R . . 
H11C H 0.3724 0.3205 0.4872 0.042 Uiso 1 1 d R . . 
C13 C 0.1628(6) 0.2059(3) 0.1465(4) 0.0490(11) Uani 1 1 d . . . 
H13 H 0.2735 0.2093 0.1686 0.059 Uiso 1 1 d R . . 
 
loop_ 
 _atom_site_aniso_label 
 _atom_site_aniso_U_11 
 _atom_site_aniso_U_22 
 _atom_site_aniso_U_33 
 _atom_site_aniso_U_23 
 _atom_site_aniso_U_13 
 _atom_site_aniso_U_12 
Mo1 0.02009(13) 0.01821(14) 0.01833(13) 0.00068(11) 0.00919(10) 0.00100(11) 
C16 0.0253(15) 0.0219(16) 0.0252(16) -0.0016(13) 0.0115(13) -0.0051(13) 
O2 0.0331(13) 0.0309(13) 0.0426(15) -0.0020(11) 0.0220(12) 0.0052(11) 
C14 0.067(3) 0.0267(19) 0.052(2) 0.0151(18) 0.041(2) 0.0082(19) 
C5 0.0256(14) 0.0209(14) 0.0161(13) 0.0031(13) 0.0069(12) 0.0028(14) 
C9 0.0234(14) 0.0165(14) 0.0210(15) 0.0045(12) 0.0071(12) 0.0045(12) 
C2 0.0246(15) 0.0317(19) 0.0290(16) 0.0079(14) 0.0124(14) 0.0060(14) 
O1 0.0331(14) 0.0372(15) 0.0453(16) -0.0093(13) 0.0092(12) -0.0071(12) 
C3 0.0218(15) 0.0270(17) 0.0303(17) 0.0053(14) 0.0080(14) -0.0034(14) 
C6 0.0302(16) 0.0274(17) 0.0191(14) 0.0014(13) 0.0109(13) 0.0031(14) 
C8 0.0295(16) 0.0186(15) 0.0251(16) 0.0048(13) 0.0121(14) 0.0037(13) 
C15 0.0282(16) 0.0239(16) 0.0298(17) -0.0016(14) 0.0132(15) 0.0020(14) 
C4 0.0263(16) 0.0231(16) 0.0201(15) 0.0030(13) 0.0036(13) 0.0019(13) 
C1 0.0238(15) 0.0228(16) 0.0258(16) 0.0046(13) 0.0097(13) 0.0093(13) 
C10 0.0364(19) 0.0329(19) 0.0347(19) -0.0021(16) 0.0177(16) 0.0080(16) 
C7 0.0309(17) 0.0271(17) 0.0268(17) 0.0082(14) 0.0160(14) 0.0014(14) 
C12 0.052(2) 0.042(2) 0.0264(17) 0.0051(17) 0.0207(17) 0.005(2) 
C11 0.041(2) 0.0277(18) 0.0297(18) -0.0060(15) 0.0112(16) -0.0044(16) 
C13 0.058(3) 0.051(3) 0.050(3) 0.019(2) 0.036(2) 0.005(2) 
 
_geom_special_details 
; 
 All esds (except the esd in the dihedral angle between two l.s. planes) 
 are estimated using the full covariance matrix.  The cell esds are taken 
 into account individually in the estimation of esds in distances, angles 
 and torsion angles; correlations between esds in cell parameters are only 
 used when they are defined by crystal symmetry.  An approximate (isotropic) 
 treatment of cell esds is used for estimating esds involving l.s. planes. 
; 
 
loop_ 
 _geom_bond_atom_site_label_1 
 _geom_bond_atom_site_label_2 
 _geom_bond_distance 
 _geom_bond_site_symmetry_2 
 _geom_bond_publ_flag 
Mo1 C15 1.941(3) . ? 
Mo1 C16 1.943(3) . ? 
Mo1 C13 2.191(4) . ? 
Mo1 C7 2.302(3) . ? 
Mo1 C6 2.316(3) . ? 
Mo1 C14 2.325(4) . ? 
Mo1 C12 2.328(3) . ? 
Mo1 C8 2.330(3) . ? 
Mo1 C5 2.425(3) . ? 
Mo1 C9 2.433(3) . ? 
C16 O2 1.157(4) . ? 
C14 C13 1.378(6) . ? 
C14 H14A 0.9699 . ? 
C14 H14B 0.9701 . ? 
C5 C4 1.426(5) . ? 
C5 C6 1.432(4) . ? 
C5 C9 1.436(4) . ? 
C9 C1 1.424(5) . ? 
C9 C8 1.436(4) . ? 
C2 C1 1.367(5) . ? 
C2 C3 1.420(5) . ? 
C2 H2 0.9300 . ? 
O1 C15 1.163(4) . ? 
C3 C4 1.363(5) . ? 
C3 H3 0.9299 . ? 
C6 C7 1.414(5) . ? 
C6 H6 0.9299 . ? 
C8 C7 1.414(5) . ? 
C8 H8 0.9300 . ? 
C4 C11 1.500(5) . ? 
C1 C10 1.499(5) . ? 
C10 H10A 0.9601 . ? 
C10 H10B 0.9600 . ? 
C10 H10C 0.9600 . ? 
C7 H7 0.9300 . ? 
C12 C13 1.341(6) . ? 
C12 H12A 0.9700 . ? 
C12 H12B 0.9701 . ? 
C11 H11A 0.9600 . ? 
C11 H11B 0.9599 . ? 
C11 H11C 0.9600 . ? 
C13 H13 0.9300 . ? 
 
loop_ 
 _geom_angle_atom_site_label_1 
 _geom_angle_atom_site_label_2 
 _geom_angle_atom_site_label_3 
 _geom_angle 
 _geom_angle_site_symmetry_1 
 _geom_angle_site_symmetry_3 
 _geom_angle_publ_flag 
C15 Mo1 C16 80.99(14) . . ? 
C15 Mo1 C13 107.44(16) . . ? 
C16 Mo1 C13 106.47(15) . . ? 
C15 Mo1 C7 95.63(13) . . ? 
C16 Mo1 C7 99.56(13) . . ? 
C13 Mo1 C7 147.38(15) . . ? 
C15 Mo1 C6 128.00(13) . . ? 
C16 Mo1 C6 89.63(13) . . ? 
C13 Mo1 C6 124.18(16) . . ? 
C7 Mo1 C6 35.65(12) . . ? 
C15 Mo1 C14 112.93(16) . . ? 
C16 Mo1 C14 73.05(14) . . ? 
C13 Mo1 C14 35.38(15) . . ? 
C7 Mo1 C14 148.34(14) . . ? 
C6 Mo1 C14 112.71(15) . . ? 
C15 Mo1 C12 76.22(15) . . ? 
C16 Mo1 C12 115.38(14) . . ? 
C13 Mo1 C12 34.35(16) . . ? 
C7 Mo1 C12 141.84(13) . . ? 
C6 Mo1 C12 149.19(13) . . ? 
C14 Mo1 C12 62.64(14) . . ? 
C15 Mo1 C8 91.96(13) . . ? 
C16 Mo1 C8 133.97(13) . . ? 
C13 Mo1 C8 118.92(15) . . ? 
C7 Mo1 C8 35.55(11) . . ? 
C6 Mo1 C8 59.51(11) . . ? 
C14 Mo1 C8 147.49(14) . . ? 
C12 Mo1 C8 106.66(13) . . ? 
C15 Mo1 C5 150.02(13) . . ? 
C16 Mo1 C5 115.19(12) . . ? 
C13 Mo1 C5 92.49(15) . . ? 
C7 Mo1 C5 58.18(11) . . ? 
C6 Mo1 C5 35.06(11) . . ? 
C14 Mo1 C5 96.35(14) . . ? 
C12 Mo1 C5 114.27(13) . . ? 
C8 Mo1 C5 58.41(11) . . ? 
C15 Mo1 C9 121.31(12) . . ? 
C16 Mo1 C9 147.44(12) . . ? 
C13 Mo1 C9 89.98(14) . . ? 
C7 Mo1 C9 57.95(11) . . ? 
C6 Mo1 C9 58.18(11) . . ? 
C14 Mo1 C9 112.67(14) . . ? 
C12 Mo1 C9 94.17(13) . . ? 
C8 Mo1 C9 35.00(11) . . ? 
C5 Mo1 C9 34.38(10) . . ? 
O2 C16 Mo1 179.4(3) . . ? 
C13 C14 Mo1 67.0(2) . . ? 
C13 C14 H14A 117.5 . . ? 
Mo1 C14 H14A 117.2 . . ? 
C13 C14 H14B 116.6 . . ? 
Mo1 C14 H14B 116.7 . . ? 
H14A C14 H14B 114.0 . . ? 
C4 C5 C6 131.6(3) . . ? 
C4 C5 C9 121.0(3) . . ? 
C6 C5 C9 107.4(3) . . ? 
C4 C5 Mo1 122.7(2) . . ? 
C6 C5 Mo1 68.29(17) . . ? 
C9 C5 Mo1 73.11(17) . . ? 
C1 C9 C8 131.6(3) . . ? 
C1 C9 C5 120.5(3) . . ? 
C8 C9 C5 107.9(3) . . ? 
C1 C9 Mo1 124.2(2) . . ? 
C8 C9 Mo1 68.55(17) . . ? 
C5 C9 Mo1 72.51(17) . . ? 
C1 C2 C3 122.4(3) . . ? 
C1 C2 H2 118.6 . . ? 
C3 C2 H2 119.0 . . ? 
C4 C3 C2 122.9(3) . . ? 
C4 C3 H3 118.5 . . ? 
C2 C3 H3 118.6 . . ? 
C7 C6 C5 107.9(3) . . ? 
C7 C6 Mo1 71.62(18) . . ? 
C5 C6 Mo1 76.65(17) . . ? 
C7 C6 H6 125.8 . . ? 
C5 C6 H6 126.3 . . ? 
Mo1 C6 H6 117.1 . . ? 
C7 C8 C9 107.4(3) . . ? 
C7 C8 Mo1 71.15(18) . . ? 
C9 C8 Mo1 76.45(17) . . ? 
C7 C8 H8 126.2 . . ? 
C9 C8 H8 126.5 . . ? 
Mo1 C8 H8 117.6 . . ? 
O1 C15 Mo1 177.6(3) . . ? 
C3 C4 C5 116.4(3) . . ? 
C3 C4 C11 123.8(3) . . ? 
C5 C4 C11 119.8(3) . . ? 
C2 C1 C9 116.8(3) . . ? 
C2 C1 C10 123.0(3) . . ? 
C9 C1 C10 120.2(3) . . ? 
C1 C10 H10A 109.2 . . ? 
C1 C10 H10B 109.4 . . ? 
H10A C10 H10B 109.5 . . ? 
C1 C10 H10C 109.8 . . ? 
H10A C10 H10C 109.5 . . ? 
H10B C10 H10C 109.5 . . ? 
C6 C7 C8 109.2(3) . . ? 
C6 C7 Mo1 72.73(18) . . ? 
C8 C7 Mo1 73.30(18) . . ? 
C6 C7 H7 125.4 . . ? 
C8 C7 H7 125.3 . . ? 
Mo1 C7 H7 121.2 . . ? 
C13 C12 Mo1 67.2(2) . . ? 
C13 C12 H12A 116.8 . . ? 
Mo1 C12 H12A 116.8 . . ? 
C13 C12 H12B 117.3 . . ? 
Mo1 C12 H12B 117.1 . . ? 
H12A C12 H12B 114.0 . . ? 
C4 C11 H11A 109.5 . . ? 
C4 C11 H11B 109.4 . . ? 
H11A C11 H11B 109.5 . . ? 
C4 C11 H11C 109.5 . . ? 
H11A C11 H11C 109.5 . . ? 
H11B C11 H11C 109.5 . . ? 
C12 C13 C14 125.6(4) . . ? 
C12 C13 Mo1 78.4(2) . . ? 
C14 C13 Mo1 77.6(2) . . ? 
C12 C13 H13 117.1 . . ? 
C14 C13 H13 117.3 . . ? 
Mo1 C13 H13 118.0 . . ? 
 
_diffrn_measured_fraction_theta_max    0.996 
_diffrn_reflns_theta_full              27.50 
_diffrn_measured_fraction_theta_full   0.996 
_refine_diff_density_max    1.652 
_refine_diff_density_min   -0.532 
_refine_diff_density_rms    0.100 
#===END

data_5 

_audit_creation_method            SHELXL-97 
_chemical_name_systematic 
; 
 ? 
; 
_chemical_name_common             ? 
_chemical_melting_point           ? 
_chemical_formula_moiety          'C24 H18 Cl2 Mo2 O4' 
_chemical_formula_sum 
 'C24 H18 Cl2 Mo2 O4' 
_chemical_formula_weight          633.16 
 
loop_ 
 _atom_type_symbol 
 _atom_type_description 
 _atom_type_scat_dispersion_real 
 _atom_type_scat_dispersion_imag 
 _atom_type_scat_source 
 'C'  'C'   0.0033   0.0016 
 'International Tables Vol C Tables 4.2.6.8 and 6.1.1.4' 
 'H'  'H'   0.0000   0.0000 
 'International Tables Vol C Tables 4.2.6.8 and 6.1.1.4' 
 'O'  'O'   0.0106   0.0060 
 'International Tables Vol C Tables 4.2.6.8 and 6.1.1.4' 
 'Cl'  'Cl'   0.1484   0.1585 
 'International Tables Vol C Tables 4.2.6.8 and 6.1.1.4' 
 'Mo'  'Mo'  -1.6832   0.6857 
 'International Tables Vol C Tables 4.2.6.8 and 6.1.1.4' 
 
_symmetry_cell_setting            'monoclinic' 
_symmetry_space_group_name_H-M    'P 21/c' 
_symmetry_space_group_name_Hall   '-P 2ybc'
 
loop_ 
 _symmetry_equiv_pos_as_xyz 
 'x, y, z' 
 '-x, y+1/2, -z+1/2' 
 '-x, -y, -z' 
 'x, -y-1/2, z-1/2' 
 
_cell_length_a                    8.0760(3) 
_cell_length_b                    8.0590(3) 
_cell_length_c                    19.1911(7) 
_cell_angle_alpha                 90 
_cell_angle_beta                  113.636(3) 
_cell_angle_gamma                 90 
_cell_volume                      1144.26(8) 
_cell_formula_units_Z             2 
_cell_measurement_temperature     150(1) 
_cell_measurement_reflns_used     8445 
_cell_measurement_theta_min       1 
_cell_measurement_theta_max       27.4 
 
_exptl_crystal_description        'plate' 
_exptl_crystal_colour             'dark brown' 
_exptl_crystal_size_max           0.33 
_exptl_crystal_size_mid           0.18 
_exptl_crystal_size_min           0.04 
_exptl_crystal_density_meas       ? 
_exptl_crystal_density_diffrn     1.838 
_exptl_crystal_density_method     'not measured' 
_exptl_crystal_F_000              624 
_exptl_absorpt_coefficient_mu     1.359 
# Absorption correction 

loop_
_exptl_crystal_face_index_h 
_exptl_crystal_face_index_k 
_exptl_crystal_face_index_l 
_exptl_crystal_face_perp_dist 
   -1    0    0  0.088
    1    0    0  0.080
    0    1    0  0.163
    0   -1    0  0.166
    0    0   -1  0.013
    0    0    1  0.022


_exptl_absorpt_correction_type 'integration' 
_exptl_absorpt_correction_T_min  0.740
_exptl_absorpt_correction_T_max  0.953
_exptl_absorpt_process_details
;
Gaussian integration (Coppens, 1970)
;
 
_diffrn_ambient_temperature       150(1) 
_diffrn_radiation_wavelength      0.71073 
_diffrn_radiation_type            MoK\a 
_diffrn_radiation_source          'fine-focus sealed tube' 
_diffrn_radiation_monochromator   graphite 
_diffrn_measurement_device_type   'Bruker Nonius KappaCCD area detector' 
_diffrn_measurement_method        '\f and \w scans to fill the Ewald sphere'  
_diffrn_detector_area_resol_mean  9.091
_diffrn_standards_number          0
_diffrn_standards_interval_count  ? 
_diffrn_standards_interval_time   ? 
_diffrn_standards_decay_%         ? 
_diffrn_reflns_number             8381 
_diffrn_reflns_av_R_equivalents   0.0363 
_diffrn_reflns_av_sigmaI/netI     0.0327 
_diffrn_reflns_limit_h_min        -9 
_diffrn_reflns_limit_h_max        10 
_diffrn_reflns_limit_k_min        -10 
_diffrn_reflns_limit_k_max        9 
_diffrn_reflns_limit_l_min        -24 
_diffrn_reflns_limit_l_max        22 
_diffrn_reflns_theta_min          2.32 
_diffrn_reflns_theta_max          27.40 
_reflns_number_total              2556 
_reflns_number_gt                 2216 
_reflns_threshold_expression      >2sigma(I) 
 
_computing_data_collection        
'COLLECT (Hooft, 1998) and DENZO (Otwinowski & Minor, 1997)'
_computing_cell_refinement        'COLLECT and DENZO' 
_computing_data_reduction         'COLLECT and DENZO' 
_computing_structure_solution     'SIR92 (Altomare et al., 1994)' 
_computing_structure_refinement   'SHELXL-97 (Sheldrick, 1997)' 
_computing_molecular_graphics     'PLATON (Spek, 2003)'
_computing_publication_material   'SHELXL-97 (Sheldrick, 2008)' 
 
_refine_special_details 
; 
 Refinement of F^2^ against ALL reflections.  The weighted R-factor wR and 
 goodness of fit S are based on F^2^, conventional R-factors R are based 
 on F, with F set to zero for negative F^2^. The threshold expression of 
 F^2^ > 2sigma(F^2^) is used only for calculating R-factors(gt) etc. and is 
 not relevant to the choice of reflections for refinement.  R-factors based 
 on F^2^ are statistically about twice as large as those based on F, and R- 
 factors based on ALL data will be even larger. 
; 
 
_refine_ls_structure_factor_coef  Fsqd  
_refine_ls_matrix_type            full 
_refine_ls_weighting_scheme       calc  
_refine_ls_weighting_details 
 'calc w=1/[\s^2^(Fo^2^)+(0.0242P)^2^+1.1944P] where P=(Fo^2^+2Fc^2^)/3' 
_atom_sites_solution_primary      direct 
_atom_sites_solution_secondary    difmap 
_atom_sites_solution_hydrogens    geom 
_refine_ls_hydrogen_treatment     constr 
_refine_ls_extinction_method      none 
_refine_ls_extinction_coef        ? 
_refine_ls_number_reflns          2556 
_refine_ls_number_parameters      145 
_refine_ls_number_restraints      0 
_refine_ls_R_factor_all           0.0374 
_refine_ls_R_factor_gt            0.0274 
_refine_ls_wR_factor_ref          0.0636 
_refine_ls_wR_factor_gt           0.0580 
_refine_ls_goodness_of_fit_ref    1.110 
_refine_ls_restrained_S_all       1.110 
_refine_ls_shift/su_max           0.000 
_refine_ls_shift/su_mean          0.000 
 
loop_ 
 _atom_site_label 
 _atom_site_type_symbol 
 _atom_site_fract_x 
 _atom_site_fract_y 
 _atom_site_fract_z 
 _atom_site_U_iso_or_equiv 
 _atom_site_adp_type 
 _atom_site_occupancy 
 _atom_site_symmetry_multiplicity 
 _atom_site_calc_flag 
 _atom_site_refinement_flags 
 _atom_site_disorder_assembly 
 _atom_site_disorder_group 
Mo1 Mo 0.12773(3) 0.01835(3) 0.112273(12) 0.01367(8) Uani 1 1 d . . . 
Cl1 Cl 0.13820(9) -0.13803(8) -0.00049(3) 0.01698(14) Uani 1 1 d . . . 
C10 C 0.3373(5) 0.0720(4) 0.30118(16) 0.0315(7) Uani 1 1 d . . . 
H10A H 0.3519 -0.0462 0.3062 0.038 Uiso 1 1 d R . . 
H10B H 0.2285 0.1035 0.3067 0.038 Uiso 1 1 d R . . 
H10C H 0.4390 0.1252 0.3399 0.038 Uiso 1 1 d R . . 
C2 C 0.4265(4) 0.0587(4) 0.18463(16) 0.0208(6) Uani 1 1 d . . . 
H2 H 0.4963 -0.0373 0.1976 0.025 Uiso 1 1 d R . . 
O2 O 0.1828(4) -0.3303(3) 0.18599(14) 0.0435(7) Uani 1 1 d . . . 
C4 C 0.4742(4) 0.1614(4) 0.06483(17) 0.0249(6) Uani 1 1 d . . . 
H4 H 0.5575 0.0808 0.0658 0.030 Uiso 1 1 d R . . 
C1 C 0.3258(4) 0.1243(3) 0.22438(15) 0.0219(6) Uani 1 1 d . . . 
C12 C 0.1639(4) -0.2027(4) 0.15726(16) 0.0253(6) Uani 1 1 d . . . 
O1 O -0.1518(3) -0.0305(3) 0.18289(15) 0.0429(6) Uani 1 1 d . . . 
C8 C 0.2739(4) 0.2895(3) 0.11794(15) 0.0185(6) Uani 1 1 d . . . 
C3 C 0.4034(4) 0.1659(3) 0.12101(15) 0.0195(6) Uani 1 1 d . . . 
C11 C -0.0510(4) -0.0096(4) 0.15495(16) 0.0256(6) Uani 1 1 d . . . 
C7 C 0.2188(4) 0.4083(3) 0.05917(16) 0.0219(6) Uani 1 1 d . . . 
H7 H 0.1347 0.4895 0.0566 0.026 Uiso 1 1 d R . . 
C5 C 0.4179(4) 0.2800(4) 0.00880(17) 0.0278(7) Uani 1 1 d . . . 
H5 H 0.4639 0.2792 -0.0285 0.033 Uiso 1 1 d R . . 
C9 C 0.2196(4) 0.2581(3) 0.18004(15) 0.0199(6) Uani 1 1 d . . . 
H9 H 0.1309 0.3153 0.1896 0.024 Uiso 1 1 d R . . 
C6 C 0.2914(4) 0.4025(4) 0.00631(17) 0.0270(7) Uani 1 1 d . . . 
H6 H 0.2564 0.4812 -0.0323 0.032 Uiso 1 1 d R . . 
 
loop_ 
 _atom_site_aniso_label 
 _atom_site_aniso_U_11 
 _atom_site_aniso_U_22 
 _atom_site_aniso_U_33 
 _atom_site_aniso_U_23 
 _atom_site_aniso_U_13 
 _atom_site_aniso_U_12 
Mo1 0.01625(13) 0.01322(13) 0.01044(12) 0.00046(8) 0.00419(8) 0.00114(8) 
Cl1 0.0177(3) 0.0176(3) 0.0137(3) -0.0013(2) 0.0042(2) 0.0040(2) 
C10 0.0406(19) 0.0361(17) 0.0120(14) 0.0027(12) 0.0046(13) 0.0101(14) 
C2 0.0172(14) 0.0201(14) 0.0188(14) -0.0010(10) 0.0006(11) 0.0016(11) 
O2 0.0768(19) 0.0200(12) 0.0341(13) 0.0109(10) 0.0225(13) 0.0069(11) 
C4 0.0197(15) 0.0265(16) 0.0279(16) -0.0036(12) 0.0090(12) -0.0045(11) 
C1 0.0246(15) 0.0222(14) 0.0128(13) -0.0044(10) 0.0012(11) -0.0003(11) 
C12 0.0366(18) 0.0223(15) 0.0166(14) -0.0010(11) 0.0104(13) 0.0015(12) 
O1 0.0372(14) 0.0634(18) 0.0377(14) 0.0144(12) 0.0249(12) 0.0047(12) 
C8 0.0179(14) 0.0151(13) 0.0186(13) -0.0038(10) 0.0032(11) -0.0027(10) 
C3 0.0163(14) 0.0193(14) 0.0183(13) -0.0026(10) 0.0022(11) -0.0030(10) 
C11 0.0260(16) 0.0308(16) 0.0177(14) 0.0052(11) 0.0063(12) 0.0024(12) 
C7 0.0229(15) 0.0156(14) 0.0215(15) -0.0007(10) 0.0031(12) -0.0034(10) 
C5 0.0283(17) 0.0330(17) 0.0233(15) -0.0010(12) 0.0116(13) -0.0084(13) 
C9 0.0224(15) 0.0165(13) 0.0161(13) -0.0045(10) 0.0027(11) 0.0008(10) 
C6 0.0295(17) 0.0216(15) 0.0252(16) 0.0046(11) 0.0061(13) -0.0067(12) 
 
_geom_special_details 
; 
 All esds (except the esd in the dihedral angle between two l.s. planes) 
 are estimated using the full covariance matrix.  The cell esds are taken 
 into account individually in the estimation of esds in distances, angles 
 and torsion angles; correlations between esds in cell parameters are only 
 used when they are defined by crystal symmetry.  An approximate (isotropic) 
 treatment of cell esds is used for estimating esds involving l.s. planes. 
; 
 
loop_ 
 _geom_bond_atom_site_label_1 
 _geom_bond_atom_site_label_2 
 _geom_bond_distance 
 _geom_bond_site_symmetry_2 
 _geom_bond_publ_flag 
Mo1 C11 1.937(3) . ? 
Mo1 C12 1.950(3) . ? 
Mo1 C1 2.271(3) . ? 
Mo1 C2 2.274(3) . ? 
Mo1 C9 2.280(3) . ? 
Mo1 C8 2.465(3) . ? 
Mo1 C3 2.469(3) . ? 
Mo1 Cl1 2.5349(7) . ? 
Mo1 Cl1 2.5396(7) 3 ? 
Cl1 Mo1 2.5397(7) 3 ? 
C10 C1 1.500(4) . ? 
C10 H10A 0.9600 . ? 
C10 H10B 0.9599 . ? 
C10 H10C 0.9599 . ? 
C2 C1 1.422(4) . ? 
C2 C3 1.445(4) . ? 
C2 H2 0.9300 . ? 
O2 C12 1.148(4) . ? 
C4 C5 1.372(4) . ? 
C4 C3 1.409(4) . ? 
C4 H4 0.9300 . ? 
C1 C9 1.427(4) . ? 
O1 C11 1.153(4) . ? 
C8 C7 1.409(4) . ? 
C8 C3 1.428(4) . ? 
C8 C9 1.448(4) . ? 
C7 C6 1.361(4) . ? 
C7 H7 0.9300 . ? 
C5 C6 1.407(5) . ? 
C5 H5 0.9300 . ? 
C9 H9 0.9301 . ? 
C6 H6 0.9300 . ? 
 
loop_ 
 _geom_angle_atom_site_label_1 
 _geom_angle_atom_site_label_2 
 _geom_angle_atom_site_label_3 
 _geom_angle 
 _geom_angle_site_symmetry_1 
 _geom_angle_site_symmetry_3 
 _geom_angle_publ_flag 
C11 Mo1 C12 73.21(13) . . ? 
C11 Mo1 C1 90.25(12) . . ? 
C12 Mo1 C1 90.02(11) . . ? 
C11 Mo1 C2 123.13(12) . . ? 
C12 Mo1 C2 85.78(12) . . ? 
C1 Mo1 C2 36.45(11) . . ? 
C11 Mo1 C9 89.13(12) . . ? 
C12 Mo1 C9 124.39(11) . . ? 
C1 Mo1 C9 36.55(10) . . ? 
C2 Mo1 C9 60.50(10) . . ? 
C11 Mo1 C8 120.62(11) . . ? 
C12 Mo1 C8 143.73(11) . . ? 
C1 Mo1 C8 58.81(10) . . ? 
C2 Mo1 C8 58.27(10) . . ? 
C9 Mo1 C8 35.25(10) . . ? 
C11 Mo1 C3 146.26(11) . . ? 
C12 Mo1 C3 116.03(12) . . ? 
C1 Mo1 C3 58.75(10) . . ? 
C2 Mo1 C3 35.17(10) . . ? 
C9 Mo1 C3 58.34(10) . . ? 
C8 Mo1 C3 33.65(9) . . ? 
C11 Mo1 Cl1 126.06(9) . . ? 
C12 Mo1 Cl1 82.72(8) . . ? 
C1 Mo1 Cl1 138.06(8) . . ? 
C2 Mo1 Cl1 101.65(8) . . ? 
C9 Mo1 Cl1 142.51(8) . . ? 
C8 Mo1 Cl1 107.40(7) . . ? 
C3 Mo1 Cl1 87.69(7) . . ? 
C11 Mo1 Cl1 83.12(9) . 3 ? 
C12 Mo1 Cl1 130.30(9) . 3 ? 
C1 Mo1 Cl1 133.90(7) . 3 ? 
C2 Mo1 Cl1 142.42(8) . 3 ? 
C9 Mo1 Cl1 97.56(7) . 3 ? 
C8 Mo1 Cl1 85.89(7) . 3 ? 
C3 Mo1 Cl1 107.97(7) . 3 ? 
Cl1 Mo1 Cl1 76.94(2) . 3 ? 
Mo1 Cl1 Mo1 103.06(2) . 3 ? 
C1 C10 H10A 109.5 . . ? 
C1 C10 H10B 109.6 . . ? 
H10A C10 H10B 109.5 . . ? 
C1 C10 H10C 109.4 . . ? 
H10A C10 H10C 109.5 . . ? 
H10B C10 H10C 109.5 . . ? 
C1 C2 C3 108.9(2) . . ? 
C1 C2 Mo1 71.65(16) . . ? 
C3 C2 Mo1 79.82(16) . . ? 
C1 C2 H2 125.5 . . ? 
C3 C2 H2 125.6 . . ? 
Mo1 C2 H2 115.1 . . ? 
C5 C4 C3 118.2(3) . . ? 
C5 C4 H4 120.8 . . ? 
C3 C4 H4 120.9 . . ? 
C2 C1 C9 107.3(2) . . ? 
C2 C1 C10 126.8(3) . . ? 
C9 C1 C10 125.7(3) . . ? 
C2 C1 Mo1 71.89(15) . . ? 
C9 C1 Mo1 72.09(15) . . ? 
C10 C1 Mo1 124.6(2) . . ? 
O2 C12 Mo1 177.1(3) . . ? 
C7 C8 C3 119.9(3) . . ? 
C7 C8 C9 132.5(3) . . ? 
C3 C8 C9 107.6(2) . . ? 
C7 C8 Mo1 125.13(19) . . ? 
C3 C8 Mo1 73.34(15) . . ? 
C9 C8 Mo1 65.39(14) . . ? 
C4 C3 C8 120.1(3) . . ? 
C4 C3 C2 132.6(3) . . ? 
C8 C3 C2 107.2(2) . . ? 
C4 C3 Mo1 124.56(19) . . ? 
C8 C3 Mo1 73.01(16) . . ? 
C2 C3 Mo1 65.01(15) . . ? 
O1 C11 Mo1 176.9(3) . . ? 
C6 C7 C8 118.7(3) . . ? 
C6 C7 H7 120.6 . . ? 
C8 C7 H7 120.6 . . ? 
C4 C5 C6 121.5(3) . . ? 
C4 C5 H5 119.3 . . ? 
C6 C5 H5 119.2 . . ? 
C1 C9 C8 108.4(2) . . ? 
C1 C9 Mo1 71.36(15) . . ? 
C8 C9 Mo1 79.36(15) . . ? 
C1 C9 H9 125.7 . . ? 
C8 C9 H9 125.9 . . ? 
Mo1 C9 H9 115.6 . . ? 
C7 C6 C5 121.5(3) . . ? 
C7 C6 H6 119.1 . . ? 
C5 C6 H6 119.4 . . ? 
 
_diffrn_measured_fraction_theta_max    0.981 
_diffrn_reflns_theta_full              27.40 
_diffrn_measured_fraction_theta_full   0.981 
_refine_diff_density_max    0.442 
_refine_diff_density_min   -0.915 
_refine_diff_density_rms    0.105 
#===END

data_6

_audit_creation_method            SHELXL-97 
_chemical_name_systematic 
; 
 ? 
; 
_chemical_name_common             ? 
_chemical_melting_point           ? 
_chemical_formula_moiety          'C26 H22 Cl2 Mo2 O4' 
_chemical_formula_sum 
 'C26 H22 Cl2 Mo2 O4' 
_chemical_formula_weight          661.22 
 
loop_ 
 _atom_type_symbol 
 _atom_type_description 
 _atom_type_scat_dispersion_real 
 _atom_type_scat_dispersion_imag 
 _atom_type_scat_source 
 'C'  'C'   0.0033   0.0016 
 'International Tables Vol C Tables 4.2.6.8 and 6.1.1.4' 
 'H'  'H'   0.0000   0.0000 
 'International Tables Vol C Tables 4.2.6.8 and 6.1.1.4' 
 'O'  'O'   0.0106   0.0060 
 'International Tables Vol C Tables 4.2.6.8 and 6.1.1.4' 
 'Cl'  'Cl'   0.1484   0.1585 
 'International Tables Vol C Tables 4.2.6.8 and 6.1.1.4' 
 'Mo'  'Mo'  -1.6832   0.6857 
 'International Tables Vol C Tables 4.2.6.8 and 6.1.1.4' 
 
_symmetry_cell_setting            'monoclinic' 
_symmetry_space_group_name_H-M    'C 2/c' 
_symmetry_space_group_name_Hall   '-C 2yc'
 
loop_ 
 _symmetry_equiv_pos_as_xyz 
 'x, y, z' 
 '-x, y, -z+1/2' 
 'x+1/2, y+1/2, z' 
 '-x+1/2, y+1/2, -z+1/2' 
 '-x, -y, -z' 
 'x, -y, z-1/2' 
 '-x+1/2, -y+1/2, -z' 
 'x+1/2, -y+1/2, z-1/2' 
 
_cell_length_a                    17.8084(7) 
_cell_length_b                    10.7830(3)
_cell_length_c                    14.1192(4)
_cell_angle_alpha                 90
_cell_angle_beta                  110.691(3) 
_cell_angle_gamma                 90 
_cell_volume                      2536.40(15) 
_cell_formula_units_Z             4 
_cell_measurement_temperature     150(1) 
_cell_measurement_reflns_used     11774 
_cell_measurement_theta_min       1 
_cell_measurement_theta_max       27.5 
 
_exptl_crystal_description        'block' 
_exptl_crystal_colour             'black' 
_exptl_crystal_size_max           0.54 
_exptl_crystal_size_mid           0.35 
_exptl_crystal_size_min           0.22 
_exptl_crystal_density_meas       ? 
_exptl_crystal_density_diffrn     1.732 
_exptl_crystal_density_method     'not measured' 
_exptl_crystal_F_000              1312 
_exptl_absorpt_coefficient_mu     1.230 
# Absorption correction 

loop_
_exptl_crystal_face_index_h 
_exptl_crystal_face_index_k 
_exptl_crystal_face_index_l 
_exptl_crystal_face_perp_dist 
   -1    0    0  0.051
    1    0    0  0.109
   -1    0    1  0.228
    1    0   -1  0.094
    0    1    0  0.132
    1   -1    0  0.129
   -1   -1    1  0.168
    0    1    1  0.197
    1    1   -1  0.103
    0   -1   -1  0.164


_exptl_absorpt_correction_type 'integration' 
_exptl_absorpt_correction_T_min  0.717
_exptl_absorpt_correction_T_max  0.837
_exptl_absorpt_process_details
;
Gaussian integration (Coppens, 1970)
;
 
_diffrn_ambient_temperature       150(1) 
_diffrn_radiation_wavelength      0.71073 
_diffrn_radiation_type            MoK\a 
_diffrn_radiation_source          'fine-focus sealed tube' 
_diffrn_radiation_monochromator   graphite 
_diffrn_measurement_device_type   'Bruker Nonius KappaCCD area detector' 
_diffrn_measurement_method        '\f and \w scans to fill the Ewald sphere'  
_diffrn_detector_area_resol_mean  9.091
_diffrn_standards_number          0
_diffrn_standards_interval_count  ? 
_diffrn_standards_interval_time   ? 
_diffrn_standards_decay_%         ? 
_diffrn_reflns_number             11714 
_diffrn_reflns_av_R_equivalents   0.0255 
_diffrn_reflns_av_sigmaI/netI     0.0183 
_diffrn_reflns_limit_h_min        -21 
_diffrn_reflns_limit_h_max        23 
_diffrn_reflns_limit_k_min        -14 
_diffrn_reflns_limit_k_max        13 
_diffrn_reflns_limit_l_min        -18 
_diffrn_reflns_limit_l_max        18 
_diffrn_reflns_theta_min          2.25 
_diffrn_reflns_theta_max          27.48 
_reflns_number_total              2886 
_reflns_number_gt                 2649 
_reflns_threshold_expression      >2sigma(I) 
 
_computing_data_collection        
'COLLECT (Hooft, 1998) and DENZO (Otwinowski & Minor, 1997)'
_computing_cell_refinement        'COLLECT and DENZO' 
_computing_data_reduction         'COLLECT and DENZO' 
_computing_structure_solution     'SIR92 (Altomare et al., 1994)' 
_computing_structure_refinement   'SHELXL-97 (Sheldrick, 1997)' 
_computing_molecular_graphics     'PLATON (Spek, 2003)'
_computing_publication_material   'SHELXL-97 (Sheldrick, 2008)' 
 
_refine_special_details 
;
 Refinement of F^2^ against ALL reflections.  The weighted R-factor wR and 
 goodness of fit S are based on F^2^, conventional R-factors R are based 
 on F, with F set to zero for negative F^2^. The threshold expression of 
 F^2^ > 2sigma(F^2^) is used only for calculating R-factors(gt) etc. and is 
 not relevant to the choice of reflections for refinement.  R-factors based 
 on F^2^ are statistically about twice as large as those based on F, and R- 
 factors based on ALL data will be even larger. 
; 
 
_refine_ls_structure_factor_coef  Fsqd  
_refine_ls_matrix_type            full 
_refine_ls_weighting_scheme       calc  
_refine_ls_weighting_details 
 'calc w=1/[\s^2^(Fo^2^)+(0.0263P)^2^+3.1772P] where P=(Fo^2^+2Fc^2^)/3' 
_atom_sites_solution_primary      direct 
_atom_sites_solution_secondary    difmap 
_atom_sites_solution_hydrogens    geom 
_refine_ls_hydrogen_treatment     constr 
_refine_ls_extinction_method      none 
_refine_ls_extinction_coef        ? 
_refine_ls_number_reflns          2886 
_refine_ls_number_parameters      154 
_refine_ls_number_restraints      0 
_refine_ls_R_factor_all           0.0246 
_refine_ls_R_factor_gt            0.0207 
_refine_ls_wR_factor_ref          0.0557 
_refine_ls_wR_factor_gt           0.0521 
_refine_ls_goodness_of_fit_ref    1.150 
_refine_ls_restrained_S_all       1.150 
_refine_ls_shift/su_max           0.001 
_refine_ls_shift/su_mean          0.000 
 
loop_ 
 _atom_site_label 
 _atom_site_type_symbol 
 _atom_site_fract_x 
 _atom_site_fract_y 
 _atom_site_fract_z 
 _atom_site_U_iso_or_equiv 
 _atom_site_adp_type 
 _atom_site_occupancy 
 _atom_site_symmetry_multiplicity 
 _atom_site_calc_flag 
 _atom_site_refinement_flags 
 _atom_site_disorder_assembly 
 _atom_site_disorder_group 
Mo1 Mo 0.142313(9) 0.325442(13) 0.468181(11) 0.01514(6) Uani 1 1 d . . . 
Cl1 Cl 0.28185(3) 0.32624(4) 0.60070(3) 0.02059(10) Uani 1 1 d . . . 
O2 O 0.16115(11) 0.61158(14) 0.49243(14) 0.0409(4) Uani 1 1 d . . . 
C5 C 0.07246(10) 0.13913(17) 0.49734(14) 0.0168(3) Uani 1 1 d . . . 
C7 C 0.01622(12) 0.33546(17) 0.46920(16) 0.0227(4) Uani 1 1 d . . . 
H7 H -0.0171 0.4016 0.4389 0.027 Uiso 1 1 d R . . 
C13 C 0.15531(12) 0.5054(2) 0.48557(15) 0.0269(4) Uani 1 1 d . . . 
O1 O 0.09459(11) 0.43783(17) 0.25333(12) 0.0428(4) Uani 1 1 d . . . 
C9 C 0.10194(11) 0.20658(17) 0.59060(14) 0.0176(3) Uani 1 1 d . . . 
C4 C 0.09523(11) 0.01482(17) 0.49098(14) 0.0203(4) Uani 1 1 d . . . 
C11 C 0.06478(13) -0.05343(19) 0.39234(17) 0.0282(4) Uani 1 1 d . . . 
H11A H 0.0883 -0.0190 0.3466 0.034 Uiso 1 1 d R . . 
H11B H 0.0074 -0.0456 0.3637 0.034 Uiso 1 1 d R . . 
H11C H 0.0790 -0.1395 0.4035 0.034 Uiso 1 1 d R . . 
C6 C 0.02248(10) 0.22281(17) 0.42110(14) 0.0197(4) Uani 1 1 d . . . 
H6 H -0.0013 0.2058 0.3524 0.024 Uiso 1 1 d R . . 
C12 C 0.11215(13) 0.39436(19) 0.33267(15) 0.0267(4) Uani 1 1 d . . . 
C10 C 0.18805(15) 0.2239(2) 0.77560(16) 0.0359(5) Uani 1 1 d . . . 
H10A H 0.2171 0.1697 0.8302 0.043 Uiso 1 1 d R . . 
H10B H 0.1445 0.2617 0.7901 0.043 Uiso 1 1 d R . . 
H10C H 0.2234 0.2873 0.7682 0.043 Uiso 1 1 d R . . 
C1 C 0.15563(12) 0.15103(19) 0.67961(15) 0.0232(4) Uani 1 1 d . . . 
C3 C 0.14617(12) -0.03691(18) 0.57941(17) 0.0277(4) Uani 1 1 d . . . 
H3 H 0.1616 -0.1192 0.5787 0.033 Uiso 1 1 d R . . 
C2 C 0.17577(12) 0.0296(2) 0.67097(16) 0.0288(4) Uani 1 1 d . . . 
H2 H 0.2107 -0.0101 0.7280 0.035 Uiso 1 1 d R . . 
C8 C 0.06926(12) 0.33030(17) 0.57149(15) 0.0216(4) Uani 1 1 d . . . 
H8 H 0.0808 0.3952 0.6178 0.026 Uiso 1 1 d R . . 
 
loop_ 
 _atom_site_aniso_label 
 _atom_site_aniso_U_11 
 _atom_site_aniso_U_22 
 _atom_site_aniso_U_33 
 _atom_site_aniso_U_23 
 _atom_site_aniso_U_13 
 _atom_site_aniso_U_12 
Mo1 0.01643(9) 0.01467(9) 0.01409(9) 0.00111(5) 0.00510(6) -0.00180(5) 
Cl1 0.0172(2) 0.0278(2) 0.0174(2) -0.00737(16) 0.00684(17) -0.00476(16) 
O2 0.0519(10) 0.0185(8) 0.0480(10) -0.0009(7) 0.0120(8) -0.0044(7) 
C5 0.0142(8) 0.0183(8) 0.0202(8) -0.0001(7) 0.0089(7) -0.0038(7) 
C7 0.0186(9) 0.0218(9) 0.0281(10) 0.0027(7) 0.0088(8) 0.0039(7) 
C13 0.0290(10) 0.0243(10) 0.0246(9) 0.0021(8) 0.0061(8) -0.0028(8) 
O1 0.0517(10) 0.0465(10) 0.0227(8) 0.0142(7) 0.0037(7) -0.0096(8) 
C9 0.0175(8) 0.0187(8) 0.0187(8) 0.0015(7) 0.0091(7) -0.0030(7) 
C4 0.0190(8) 0.0180(8) 0.0282(9) 0.0000(7) 0.0139(7) -0.0041(7) 
C11 0.0314(10) 0.0228(10) 0.0354(11) -0.0081(8) 0.0180(9) -0.0074(8) 
C6 0.0144(8) 0.0236(9) 0.0200(9) 0.0013(7) 0.0046(7) -0.0016(7) 
C12 0.0287(10) 0.0259(10) 0.0231(10) 0.0016(8) 0.0062(8) -0.0065(8) 
C10 0.0430(13) 0.0423(13) 0.0201(10) 0.0019(9) 0.0083(9) -0.0158(11) 
C1 0.0214(9) 0.0282(10) 0.0203(9) 0.0048(8) 0.0078(7) -0.0069(8) 
C3 0.0284(10) 0.0186(9) 0.0381(11) 0.0074(8) 0.0144(9) 0.0022(8) 
C2 0.0256(10) 0.0289(10) 0.0294(10) 0.0135(9) 0.0068(8) -0.0002(8) 
C8 0.0240(9) 0.0198(9) 0.0244(10) -0.0019(7) 0.0129(8) -0.0006(7) 
 
_geom_special_details 
; 
 All esds (except the esd in the dihedral angle between two l.s. planes) 
 are estimated using the full covariance matrix.  The cell esds are taken 
 into account individually in the estimation of esds in distances, angles 
 and torsion angles; correlations between esds in cell parameters are only 
 used when they are defined by crystal symmetry.  An approximate (isotropic) 
 treatment of cell esds is used for estimating esds involving l.s. planes. 
; 
 
loop_ 
 _geom_bond_atom_site_label_1 
 _geom_bond_atom_site_label_2 
 _geom_bond_distance 
 _geom_bond_site_symmetry_2 
 _geom_bond_publ_flag 
Mo1 C12 1.943(2) . ? 
Mo1 C13 1.959(2) . ? 
Mo1 C7 2.2533(19) . ? 
Mo1 C8 2.2724(19) . ? 
Mo1 C6 2.2843(18) . ? 
Mo1 C9 2.4547(17) . ? 
Mo1 C5 2.4728(17) . ? 
Mo1 Cl1 2.5246(5) 7_556 ? 
Mo1 Cl1 2.5278(5) . ? 
Cl1 Mo1 2.5246(5) 7_556 ? 
O2 C13 1.151(3) . ? 
C5 C4 1.412(3) . ? 
C5 C9 1.432(3) . ? 
C5 C6 1.445(3) . ? 
C7 C6 1.415(3) . ? 
C7 C8 1.420(3) . ? 
C7 H7 0.9301 . ? 
O1 C12 1.151(3) . ? 
C9 C1 1.415(3) . ? 
C9 C8 1.442(3) . ? 
C4 C3 1.376(3) . ? 
C4 C11 1.497(3) . ? 
C11 H11A 0.9601 . ? 
C11 H11B 0.9600 . ? 
C11 H11C 0.9600 . ? 
C6 H6 0.9299 . ? 
C10 C1 1.495(3) . ? 
C10 H10A 0.9600 . ? 
C10 H10B 0.9600 . ? 
C10 H10C 0.9600 . ? 
C1 C2 1.374(3) . ? 
C3 C2 1.408(3) . ? 
C3 H3 0.9300 . ? 
C2 H2 0.9300 . ? 
C8 H8 0.9300 . ? 
 
loop_ 
 _geom_angle_atom_site_label_1 
 _geom_angle_atom_site_label_2 
 _geom_angle_atom_site_label_3 
 _geom_angle 
 _geom_angle_site_symmetry_1 
 _geom_angle_site_symmetry_3 
 _geom_angle_publ_flag 
C12 Mo1 C13 73.98(8) . . ? 
C12 Mo1 C7 93.36(8) . . ? 
C13 Mo1 C7 91.46(8) . . ? 
C12 Mo1 C8 126.98(8) . . ? 
C13 Mo1 C8 88.04(8) . . ? 
C7 Mo1 C8 36.58(7) . . ? 
C12 Mo1 C6 89.65(8) . . ? 
C13 Mo1 C6 124.96(8) . . ? 
C7 Mo1 C6 36.34(7) . . ? 
C8 Mo1 C6 60.67(7) . . ? 
C12 Mo1 C9 147.70(7) . . ? 
C13 Mo1 C9 118.68(7) . . ? 
C7 Mo1 C9 58.67(7) . . ? 
C8 Mo1 C9 35.26(6) . . ? 
C6 Mo1 C9 58.40(6) . . ? 
C12 Mo1 C5 119.63(7) . . ? 
C13 Mo1 C5 145.87(7) . . ? 
C7 Mo1 C5 58.45(6) . . ? 
C8 Mo1 C5 58.40(6) . . ? 
C6 Mo1 C5 35.08(6) . . ? 
C9 Mo1 C5 33.78(6) . . ? 
C12 Mo1 Cl1 82.41(7) . 7_556 ? 
C13 Mo1 Cl1 129.37(6) . 7_556 ? 
C7 Mo1 Cl1 134.71(5) . 7_556 ? 
C8 Mo1 Cl1 140.15(5) . 7_556 ? 
C6 Mo1 Cl1 98.39(5) . 7_556 ? 
C9 Mo1 Cl1 105.23(4) . 7_556 ? 
C5 Mo1 Cl1 84.66(4) . 7_556 ? 
C12 Mo1 Cl1 125.80(6) . . ? 
C13 Mo1 Cl1 82.08(6) . . ? 
C7 Mo1 Cl1 135.75(5) . . ? 
C8 Mo1 Cl1 99.25(5) . . ? 
C6 Mo1 Cl1 142.18(5) . . ? 
C9 Mo1 Cl1 86.36(4) . . ? 
C5 Mo1 Cl1 107.48(4) . . ? 
Cl1 Mo1 Cl1 76.561(15) 7_556 . ? 
Mo1 Cl1 Mo1 103.440(15) 7_556 . ? 
C4 C5 C9 121.35(17) . . ? 
C4 C5 C6 131.33(17) . . ? 
C9 C5 C6 107.29(16) . . ? 
C4 C5 Mo1 126.00(12) . . ? 
C9 C5 Mo1 72.42(10) . . ? 
C6 C5 Mo1 65.32(10) . . ? 
C6 C7 C8 108.51(16) . . ? 
C6 C7 Mo1 73.03(11) . . ? 
C8 C7 Mo1 72.45(11) . . ? 
C6 C7 H7 125.7 . . ? 
C8 C7 H7 125.8 . . ? 
Mo1 C7 H7 120.6 . . ? 
O2 C13 Mo1 177.7(2) . . ? 
C1 C9 C5 120.98(17) . . ? 
C1 C9 C8 131.21(18) . . ? 
C5 C9 C8 107.77(16) . . ? 
C1 C9 Mo1 124.90(13) . . ? 
C5 C9 Mo1 73.80(10) . . ? 
C8 C9 Mo1 65.45(10) . . ? 
C3 C4 C5 116.06(18) . . ? 
C3 C4 C11 123.42(18) . . ? 
C5 C4 C11 120.52(17) . . ? 
C4 C11 H11A 109.6 . . ? 
C4 C11 H11B 109.3 . . ? 
H11A C11 H11B 109.5 . . ? 
C4 C11 H11C 109.5 . . ? 
H11A C11 H11C 109.5 . . ? 
H11B C11 H11C 109.5 . . ? 
C7 C6 C5 108.10(16) . . ? 
C7 C6 Mo1 70.64(11) . . ? 
C5 C6 Mo1 79.60(10) . . ? 
C7 C6 H6 125.9 . . ? 
C5 C6 H6 126.0 . . ? 
Mo1 C6 H6 115.7 . . ? 
O1 C12 Mo1 178.45(19) . . ? 
C1 C10 H10A 109.5 . . ? 
C1 C10 H10B 109.5 . . ? 
H10A C10 H10B 109.5 . . ? 
C1 C10 H10C 109.4 . . ? 
H10A C10 H10C 109.5 . . ? 
H10B C10 H10C 109.5 . . ? 
C2 C1 C9 116.10(19) . . ? 
C2 C1 C10 123.5(2) . . ? 
C9 C1 C10 120.38(19) . . ? 
C4 C3 C2 122.65(18) . . ? 
C4 C3 H3 118.7 . . ? 
C2 C3 H3 118.6 . . ? 
C1 C2 C3 122.84(19) . . ? 
C1 C2 H2 118.5 . . ? 
C3 C2 H2 118.6 . . ? 
C7 C8 C9 107.81(16) . . ? 
C7 C8 Mo1 70.98(11) . . ? 
C9 C8 Mo1 79.28(10) . . ? 
C7 C8 H8 126.0 . . ? 
C9 C8 H8 126.2 . . ? 
Mo1 C8 H8 115.7 . . ? 
 
_diffrn_measured_fraction_theta_max    0.991 
_diffrn_reflns_theta_full              27.48 
_diffrn_measured_fraction_theta_full   0.991 
_refine_diff_density_max    0.373 
_refine_diff_density_min   -0.939 
_refine_diff_density_rms    0.085 
#===END

data_8

_audit_creation_method            SHELXL-97 
_chemical_name_systematic 
; 
 ? 
; 
_chemical_name_common             ? 
_chemical_melting_point           ? 
_chemical_formula_moiety          'C17 H14 Mo O2' 
_chemical_formula_sum 
 'C17 H14 Mo O2' 
_chemical_formula_weight          346.22 
 
loop_ 
 _atom_type_symbol 
 _atom_type_description 
 _atom_type_scat_dispersion_real 
 _atom_type_scat_dispersion_imag 
 _atom_type_scat_source 
 'C'  'C'   0.0033   0.0016 
 'International Tables Vol C Tables 4.2.6.8 and 6.1.1.4' 
 'H'  'H'   0.0000   0.0000 
 'International Tables Vol C Tables 4.2.6.8 and 6.1.1.4' 
 'O'  'O'   0.0106   0.0060 
 'International Tables Vol C Tables 4.2.6.8 and 6.1.1.4' 
 'Mo'  'Mo'  -1.6832   0.6857 
 'International Tables Vol C Tables 4.2.6.8 and 6.1.1.4' 
 
_symmetry_cell_setting            'monoclinic' 
_symmetry_space_group_name_H-M    'P 21/c' 
_symmetry_space_group_name_Hall   '-P 2ybc' 
 
loop_ 
 _symmetry_equiv_pos_as_xyz 
 'x, y, z' 
 '-x, y+1/2, -z+1/2' 
 '-x, -y, -z' 
 'x, -y-1/2, z-1/2' 
 
_cell_length_a                    11.1300(6) 
_cell_length_b                    6.3040(2) 
_cell_length_c                    20.0651(16) 
_cell_angle_alpha                 90 
_cell_angle_beta                  96.324(5) 
_cell_angle_gamma                 90 
_cell_volume                      1399.27(14) 
_cell_formula_units_Z             4 
_cell_measurement_temperature     150(1) 
_cell_measurement_reflns_used     11631 
_cell_measurement_theta_min       1 
_cell_measurement_theta_max       27.5 
 
_exptl_crystal_description        'plate' 
_exptl_crystal_colour             'dark red' 
_exptl_crystal_size_max           0.37 
_exptl_crystal_size_mid           0.31 
_exptl_crystal_size_min           0.11 
_exptl_crystal_density_meas       ? 
_exptl_crystal_density_diffrn     1.643 
_exptl_crystal_density_method     'not measured' 
_exptl_crystal_F_000              696 
_exptl_absorpt_coefficient_mu     0.935 
# Absorption correction 

loop_
_exptl_crystal_face_index_h 
_exptl_crystal_face_index_k 
_exptl_crystal_face_index_l 
_exptl_crystal_face_perp_dist 
    1    1    0  0.100
    1   -1    0  0.098
   -1    0    0  0.073
    1    0    1  0.051
   -1    0   -1  0.053
    0    0    1  0.098
    0    0   -1  0.126


_exptl_absorpt_correction_type 'integration' 
_exptl_absorpt_correction_T_min  0.799
_exptl_absorpt_correction_T_max  0.916
_exptl_absorpt_process_details
;
Gaussian integration (Coppens, 1970)
;
 
_diffrn_ambient_temperature       150(1) 
_diffrn_radiation_wavelength      0.71073 
_diffrn_radiation_type            MoK\a 
_diffrn_radiation_source          'fine-focus sealed tube' 
_diffrn_radiation_monochromator   graphite 
_diffrn_measurement_device_type   'Bruker Nonius KappaCCD area detector' 
_diffrn_measurement_method        '\f and \w scans to fill the Ewald sphere'  
_diffrn_detector_area_resol_mean  9.091
_diffrn_standards_number          0 
_diffrn_standards_interval_count  ? 
_diffrn_standards_interval_time   ? 
_diffrn_standards_decay_%         ? 
_diffrn_reflns_number             11569 
_diffrn_reflns_av_R_equivalents   0.0421 
_diffrn_reflns_av_sigmaI/netI     0.0303 
_diffrn_reflns_limit_h_min        -13 
_diffrn_reflns_limit_h_max        14 
_diffrn_reflns_limit_k_min        -7 
_diffrn_reflns_limit_k_max        8 
_diffrn_reflns_limit_l_min        -26 
_diffrn_reflns_limit_l_max        26 
_diffrn_reflns_theta_min          1.84 
_diffrn_reflns_theta_max          27.50 
_reflns_number_total              3189 
_reflns_number_gt                 2780 
_reflns_threshold_expression      >2sigma(I) 
 
_computing_data_collection        
'COLLECT (Hooft, 1998) and DENZO (Otwinowski & Minor, 1997)'
_computing_cell_refinement        'COLLECT and DENZO' 
_computing_data_reduction         'COLLECT and DENZO' 
_computing_structure_solution     'SIR92 (Altomare et al., 1994)' 
_computing_structure_refinement   'SHELXL-97 (Sheldrick, 1997)' 
_computing_molecular_graphics     'PLATON (Spek, 2003)'
_computing_publication_material   'SHELXL-97 (Sheldrick, 2008)' 
 
_refine_special_details 
; 
 Refinement of F^2^ against ALL reflections.  The weighted R-factor wR and 
 goodness of fit S are based on F^2^, conventional R-factors R are based 
 on F, with F set to zero for negative F^2^. The threshold expression of 
 F^2^ > 2sigma(F^2^) is used only for calculating R-factors(gt) etc. and is 
 not relevant to the choice of reflections for refinement.  R-factors based 
 on F^2^ are statistically about twice as large as those based on F, and R- 
 factors based on ALL data will be even larger. 
; 
 
_refine_ls_structure_factor_coef  Fsqd  
_refine_ls_matrix_type            full 
_refine_ls_weighting_scheme       calc  
_refine_ls_weighting_details 
 'calc w=1/[\s^2^(Fo^2^)+(0.0272P)^2^+1.0659P] where P=(Fo^2^+2Fc^2^)/3' 
_atom_sites_solution_primary      direct 
_atom_sites_solution_secondary    difmap 
_atom_sites_solution_hydrogens    geom 
_refine_ls_hydrogen_treatment     constr 
_refine_ls_extinction_method      none 
_refine_ls_extinction_coef        ? 
_refine_ls_number_reflns          3189 
_refine_ls_number_parameters      181 
_refine_ls_number_restraints      0 
_refine_ls_R_factor_all           0.0347 
_refine_ls_R_factor_gt            0.0265 
_refine_ls_wR_factor_ref          0.0645 
_refine_ls_wR_factor_gt           0.0599 
_refine_ls_goodness_of_fit_ref    1.091 
_refine_ls_restrained_S_all       1.091 
_refine_ls_shift/su_max           0.001 
_refine_ls_shift/su_mean          0.000 
 
loop_ 
 _atom_site_label 
 _atom_site_type_symbol 
 _atom_site_fract_x 
 _atom_site_fract_y 
 _atom_site_fract_z 
 _atom_site_U_iso_or_equiv 
 _atom_site_adp_type 
 _atom_site_occupancy 
 _atom_site_symmetry_multiplicity 
 _atom_site_calc_flag 
 _atom_site_refinement_flags 
 _atom_site_disorder_assembly 
 _atom_site_disorder_group 
Mo1 Mo 0.808381(16) 0.15725(3) 0.388017(9) 0.01784(7) Uani 1 1 d . . . 
C16 C 0.7515(2) -0.0432(4) 0.45236(11) 0.0258(5) Uani 1 1 d . . . 
C7 C 0.63402(19) 0.1970(4) 0.26591(11) 0.0195(4) Uani 1 1 d . . . 
O1 O 0.7214(2) -0.1592(3) 0.49159(10) 0.0418(5) Uani 1 1 d . . . 
C8 C 0.6102(2) 0.1080(4) 0.33083(11) 0.0219(4) Uani 1 1 d . . . 
H8 H 0.5957 -0.0340 0.3397 0.026 Uiso 1 1 d R . . 
O2 O 0.8493(2) 0.4084(3) 0.52185(9) 0.0463(5) Uani 1 1 d . . . 
C17 C 0.8315(2) 0.3204(4) 0.47139(12) 0.0291(5) Uani 1 1 d . . . 
C2 C 0.8980(2) 0.0312(5) 0.29294(12) 0.0326(6) Uani 1 1 d . . . 
H2 H 0.8523 -0.0115 0.2536 0.039 Uiso 1 1 d R . . 
C14 C 0.6216(2) 0.1134(4) 0.20151(11) 0.0272(5) Uani 1 1 d . . . 
H14 H 0.5921 -0.0232 0.1931 0.033 Uiso 1 1 d R . . 
C6 C 0.6779(2) 0.4056(4) 0.27787(11) 0.0218(4) Uani 1 1 d . . . 
C10 C 0.6796(2) 0.4431(4) 0.35024(11) 0.0237(5) Uani 1 1 d . . . 
H10 H 0.7173 0.5556 0.3741 0.028 Uiso 1 1 d R . . 
C13 C 0.6550(2) 0.2400(5) 0.14971(12) 0.0343(6) Uani 1 1 d . . . 
H13 H 0.6473 0.1873 0.1061 0.041 Uiso 1 1 d R . . 
C5 C 1.0071(2) 0.2321(5) 0.37065(15) 0.0422(7) Uani 1 1 d . . . 
H5 H 1.0454 0.3480 0.3924 0.051 Uiso 1 1 d R . . 
C15 C 0.5456(2) 0.2921(5) 0.43793(12) 0.0356(6) Uani 1 1 d . . . 
H15A H 0.4635 0.3334 0.4242 0.043 Uiso 1 1 d R . . 
H15B H 0.5834 0.3958 0.4684 0.043 Uiso 1 1 d R . . 
H15C H 0.5464 0.1566 0.4598 0.043 Uiso 1 1 d R . . 
C11 C 0.7100(2) 0.5281(4) 0.22576(13) 0.0304(5) Uani 1 1 d . . . 
H11 H 0.7386 0.6655 0.2334 0.037 Uiso 1 1 d R . . 
C12 C 0.6985(2) 0.4423(5) 0.16147(12) 0.0351(6) Uani 1 1 d . . . 
H12 H 0.7209 0.5229 0.1260 0.042 Uiso 1 1 d R . . 
C9 C 0.6137(2) 0.2772(4) 0.37757(11) 0.0232(5) Uani 1 1 d . . . 
C4 C 1.0029(2) 0.0256(6) 0.39638(14) 0.0461(8) Uani 1 1 d . . . 
H4 H 1.0399 -0.0209 0.4376 0.055 Uiso 1 1 d R . . 
C3 C 0.9328(3) -0.0982(5) 0.34845(16) 0.0414(7) Uani 1 1 d . . . 
H3 H 0.9132 -0.2405 0.3528 0.050 Uiso 1 1 d R . . 
C1 C 0.9431(2) 0.2324(5) 0.30649(14) 0.0364(6) Uani 1 1 d . . . 
H1 H 0.9329 0.3490 0.2780 0.044 Uiso 1 1 d R . . 
 
loop_ 
 _atom_site_aniso_label 
 _atom_site_aniso_U_11 
 _atom_site_aniso_U_22 
 _atom_site_aniso_U_33 
 _atom_site_aniso_U_23 
 _atom_site_aniso_U_13 
 _atom_site_aniso_U_12 
Mo1 0.01716(10) 0.01903(11) 0.01740(10) -0.00252(7) 0.00219(7) 0.00143(8) 
C16 0.0296(12) 0.0254(12) 0.0220(11) -0.0029(10) 0.0016(9) 0.0047(10) 
C7 0.0160(10) 0.0232(11) 0.0194(10) -0.0004(8) 0.0023(8) 0.0002(9) 
O1 0.0606(13) 0.0352(10) 0.0316(10) 0.0090(8) 0.0142(9) 0.0018(10) 
C8 0.0193(10) 0.0244(11) 0.0223(10) 0.0033(9) 0.0030(8) -0.0020(9) 
O2 0.0589(13) 0.0484(12) 0.0293(10) -0.0170(9) -0.0055(9) 0.0024(11) 
C17 0.0298(13) 0.0304(13) 0.0263(12) -0.0015(10) -0.0009(10) 0.0046(11) 
C2 0.0212(11) 0.0489(16) 0.0288(12) -0.0134(12) 0.0080(9) 0.0041(12) 
C14 0.0248(11) 0.0328(13) 0.0232(11) -0.0054(10) -0.0002(9) -0.0001(10) 
C6 0.0184(10) 0.0223(11) 0.0245(11) 0.0002(9) 0.0010(9) 0.0009(9) 
C10 0.0266(11) 0.0202(11) 0.0234(11) -0.0040(9) -0.0007(9) 0.0053(10) 
C13 0.0284(12) 0.0565(17) 0.0181(11) -0.0014(11) 0.0027(9) 0.0055(13) 
C5 0.0195(12) 0.0549(18) 0.0536(17) -0.0244(15) 0.0105(12) -0.0098(13) 
C15 0.0286(13) 0.0562(18) 0.0230(11) 0.0021(11) 0.0077(10) 0.0140(13) 
C11 0.0263(12) 0.0288(12) 0.0352(13) 0.0112(11) -0.0013(10) -0.0039(11) 
C12 0.0254(12) 0.0544(17) 0.0264(12) 0.0147(12) 0.0072(10) -0.0002(12) 
C9 0.0195(10) 0.0297(12) 0.0205(10) 0.0011(9) 0.0026(8) 0.0076(10) 
C4 0.0246(13) 0.081(2) 0.0334(13) 0.0070(15) 0.0050(11) 0.0260(15) 
C3 0.0397(15) 0.0303(14) 0.0588(18) -0.0019(13) 0.0257(14) 0.0114(12) 
C1 0.0249(12) 0.0437(15) 0.0438(15) 0.0097(13) 0.0188(11) 0.0057(12) 
 
_geom_special_details 
; 
 All esds (except the esd in the dihedral angle between two l.s. planes) 
 are estimated using the full covariance matrix.  The cell esds are taken 
 into account individually in the estimation of esds in distances, angles 
 and torsion angles; correlations between esds in cell parameters are only 
 used when they are defined by crystal symmetry.  An approximate (isotropic) 
 treatment of cell esds is used for estimating esds involving l.s. planes. 
; 
 
loop_ 
 _geom_bond_atom_site_label_1 
 _geom_bond_atom_site_label_2 
 _geom_bond_distance 
 _geom_bond_site_symmetry_2 
 _geom_bond_publ_flag 
Mo1 C17 1.956(2) . ? 
Mo1 C16 1.961(2) . ? 
Mo1 C9 2.283(2) . ? 
Mo1 C4 2.308(3) . ? 
Mo1 C3 2.320(3) . ? 
Mo1 C5 2.325(3) . ? 
Mo1 C10 2.374(2) . ? 
Mo1 C2 2.384(2) . ? 
Mo1 C1 2.385(2) . ? 
Mo1 C8 2.392(2) . ? 
C16 O1 1.151(3) . ? 
C7 C14 1.388(3) . ? 
C7 C6 1.414(3) . ? 
C7 C8 1.469(3) . ? 
C8 C9 1.418(3) . ? 
C8 H8 0.9301 . ? 
O2 C17 1.152(3) . ? 
C2 C1 1.380(4) . ? 
C2 C3 1.401(4) . ? 
C2 H2 0.9301 . ? 
C14 C13 1.393(4) . ? 
C14 H14 0.9300 . ? 
C6 C11 1.378(3) . ? 
C6 C10 1.469(3) . ? 
C10 C9 1.421(3) . ? 
C10 H10 0.9300 . ? 
C13 C12 1.376(4) . ? 
C13 H13 0.9302 . ? 
C5 C1 1.401(4) . ? 
C5 C4 1.403(5) . ? 
C5 H5 0.9300 . ? 
C15 C9 1.501(3) . ? 
C15 H15A 0.9600 . ? 
C15 H15B 0.9600 . ? 
C15 H15C 0.9599 . ? 
C11 C12 1.392(4) . ? 
C11 H11 0.9300 . ? 
C12 H12 0.9300 . ? 
C4 C3 1.406(5) . ? 
C4 H4 0.9300 . ? 
C3 H3 0.9300 . ? 
C1 H1 0.9299 . ? 
 
loop_ 
 _geom_angle_atom_site_label_1 
 _geom_angle_atom_site_label_2 
 _geom_angle_atom_site_label_3 
 _geom_angle 
 _geom_angle_site_symmetry_1 
 _geom_angle_site_symmetry_3 
 _geom_angle_publ_flag 
C17 Mo1 C16 78.31(10) . . ? 
C17 Mo1 C9 86.46(9) . . ? 
C16 Mo1 C9 84.37(9) . . ? 
C17 Mo1 C4 95.34(11) . . ? 
C16 Mo1 C4 95.10(11) . . ? 
C9 Mo1 C4 177.99(11) . . ? 
C17 Mo1 C3 129.07(11) . . ? 
C16 Mo1 C3 91.51(10) . . ? 
C9 Mo1 C3 142.65(10) . . ? 
C4 Mo1 C3 35.38(12) . . ? 
C17 Mo1 C5 89.08(10) . . ? 
C16 Mo1 C5 127.66(11) . . ? 
C9 Mo1 C5 145.89(11) . . ? 
C4 Mo1 C5 35.25(12) . . ? 
C3 Mo1 C5 58.39(11) . . ? 
C17 Mo1 C10 83.79(9) . . ? 
C16 Mo1 C10 118.16(9) . . ? 
C9 Mo1 C10 35.47(8) . . ? 
C4 Mo1 C10 145.57(11) . . ? 
C3 Mo1 C10 141.23(10) . . ? 
C5 Mo1 C10 110.43(11) . . ? 
C17 Mo1 C2 146.34(10) . . ? 
C16 Mo1 C2 120.39(10) . . ? 
C9 Mo1 C2 120.89(8) . . ? 
C4 Mo1 C2 57.76(9) . . ? 
C3 Mo1 C2 34.60(10) . . ? 
C5 Mo1 C2 57.25(9) . . ? 
C10 Mo1 C2 106.77(9) . . ? 
C17 Mo1 C1 116.66(11) . . ? 
C16 Mo1 C1 148.49(10) . . ? 
C9 Mo1 C1 122.23(9) . . ? 
C4 Mo1 C1 57.69(10) . . ? 
C3 Mo1 C1 57.25(10) . . ? 
C5 Mo1 C1 34.57(10) . . ? 
C10 Mo1 C1 91.92(9) . . ? 
C2 Mo1 C1 33.64(10) . . ? 
C17 Mo1 C8 120.38(9) . . ? 
C16 Mo1 C8 83.37(9) . . ? 
C9 Mo1 C8 35.23(8) . . ? 
C4 Mo1 C8 142.81(11) . . ? 
C3 Mo1 C8 107.43(10) . . ? 
C5 Mo1 C8 142.81(9) . . ? 
C10 Mo1 C8 56.83(8) . . ? 
C2 Mo1 C8 91.02(8) . . ? 
C1 Mo1 C8 108.24(9) . . ? 
O1 C16 Mo1 177.7(2) . . ? 
C14 C7 C6 120.5(2) . . ? 
C14 C7 C8 132.2(2) . . ? 
C6 C7 C8 107.28(19) . . ? 
C9 C8 C7 107.7(2) . . ? 
C9 C8 Mo1 68.19(12) . . ? 
C7 C8 Mo1 97.42(13) . . ? 
C9 C8 H8 126.2 . . ? 
C7 C8 H8 126.1 . . ? 
Mo1 C8 H8 101.7 . . ? 
O2 C17 Mo1 176.4(2) . . ? 
C1 C2 C3 108.4(2) . . ? 
C1 C2 Mo1 73.23(14) . . ? 
C3 C2 Mo1 70.21(14) . . ? 
C1 C2 H2 125.9 . . ? 
C3 C2 H2 125.7 . . ? 
Mo1 C2 H2 122.5 . . ? 
C7 C14 C13 118.0(2) . . ? 
C7 C14 H14 121.1 . . ? 
C13 C14 H14 120.9 . . ? 
C11 C6 C7 120.4(2) . . ? 
C11 C6 C10 133.1(2) . . ? 
C7 C6 C10 106.50(19) . . ? 
C9 C10 C6 108.2(2) . . ? 
C9 C10 Mo1 68.74(13) . . ? 
C6 C10 Mo1 97.77(14) . . ? 
C9 C10 H10 125.8 . . ? 
C6 C10 H10 126.0 . . ? 
Mo1 C10 H10 101.0 . . ? 
C12 C13 C14 121.4(2) . . ? 
C12 C13 H13 119.1 . . ? 
C14 C13 H13 119.5 . . ? 
C1 C5 C4 107.8(3) . . ? 
C1 C5 Mo1 75.08(14) . . ? 
C4 C5 Mo1 71.71(15) . . ? 
C1 C5 H5 126.2 . . ? 
C4 C5 H5 126.0 . . ? 
Mo1 C5 H5 119.0 . . ? 
C9 C15 H15A 109.6 . . ? 
C9 C15 H15B 109.3 . . ? 
H15A C15 H15B 109.5 . . ? 
C9 C15 H15C 109.5 . . ? 
H15A C15 H15C 109.5 . . ? 
H15B C15 H15C 109.5 . . ? 
C6 C11 C12 118.7(2) . . ? 
C6 C11 H11 120.6 . . ? 
C12 C11 H11 120.6 . . ? 
C13 C12 C11 120.9(2) . . ? 
C13 C12 H12 119.6 . . ? 
C11 C12 H12 119.4 . . ? 
C8 C9 C10 106.03(19) . . ? 
C8 C9 C15 126.9(2) . . ? 
C10 C9 C15 126.4(2) . . ? 
C8 C9 Mo1 76.59(13) . . ? 
C10 C9 Mo1 75.79(13) . . ? 
C15 C9 Mo1 120.36(16) . . ? 
C5 C4 C3 107.5(3) . . ? 
C5 C4 Mo1 73.04(15) . . ? 
C3 C4 Mo1 72.80(15) . . ? 
C5 C4 H4 126.2 . . ? 
C3 C4 H4 126.2 . . ? 
Mo1 C4 H4 119.8 . . ? 
C2 C3 C4 107.8(3) . . ? 
C2 C3 Mo1 75.19(15) . . ? 
C4 C3 Mo1 71.82(15) . . ? 
C2 C3 H3 126.1 . . ? 
C4 C3 H3 126.1 . . ? 
Mo1 C3 H3 118.8 . . ? 
C2 C1 C5 108.5(3) . . ? 
C2 C1 Mo1 73.13(14) . . ? 
C5 C1 Mo1 70.34(15) . . ? 
C2 C1 H1 126.0 . . ? 
C5 C1 H1 125.5 . . ? 
Mo1 C1 H1 122.3 . . ? 
 
_diffrn_measured_fraction_theta_max    0.991 
_diffrn_reflns_theta_full              27.50 
_diffrn_measured_fraction_theta_full   0.991 
_refine_diff_density_max    0.545 
_refine_diff_density_min   -0.651 
_refine_diff_density_rms    0.084 
#===END

data_9
 
_audit_creation_method            SHELXL-97 
_chemical_name_systematic 
; 
 ? 
; 
_chemical_name_common             ? 
_chemical_melting_point           ? 
_chemical_formula_moiety          'C18 H16 Mo O2' 
_chemical_formula_sum 
 'C18 H16 Mo O2' 
_chemical_formula_weight          360.25 
 
loop_ 
 _atom_type_symbol 
 _atom_type_description 
 _atom_type_scat_dispersion_real 
 _atom_type_scat_dispersion_imag 
 _atom_type_scat_source 
 'C'  'C'   0.0033   0.0016 
 'International Tables Vol C Tables 4.2.6.8 and 6.1.1.4' 
 'H'  'H'   0.0000   0.0000 
 'International Tables Vol C Tables 4.2.6.8 and 6.1.1.4' 
 'O'  'O'   0.0106   0.0060 
 'International Tables Vol C Tables 4.2.6.8 and 6.1.1.4' 
 'Mo'  'Mo'  -1.6832   0.6857 
 'International Tables Vol C Tables 4.2.6.8 and 6.1.1.4' 
 
_symmetry_cell_setting            'monoclinic' 
_symmetry_space_group_name_H-M    'P 21/c' 
_symmetry_space_group_name_Hall   '-P 2ybc' 
 
loop_ 
 _symmetry_equiv_pos_as_xyz 
 'x, y, z' 
 '-x, y+1/2, -z+1/2' 
 '-x, -y, -z' 
 'x, -y-1/2, z-1/2' 
 
_cell_length_a                    7.9640(5) 
_cell_length_b                    17.3059(12) 
_cell_length_c                    12.8690(3) 
_cell_angle_alpha                 90 
_cell_angle_beta                  123.465(5) 
_cell_angle_gamma                 90 
_cell_volume                      1479.63(17) 
_cell_formula_units_Z             4 
_cell_measurement_temperature     150(1) 
_cell_measurement_reflns_used     16353 
_cell_measurement_theta_min       1 
_cell_measurement_theta_max       29.5 
 
_exptl_crystal_description        'block' 
_exptl_crystal_colour             'black' 
_exptl_crystal_size_max           0.28 
_exptl_crystal_size_mid           0.26 
_exptl_crystal_size_min           0.24 
_exptl_crystal_density_meas       ? 
_exptl_crystal_density_diffrn     1.617 
_exptl_crystal_density_method     'not measured' 
_exptl_crystal_F_000              728 
_exptl_absorpt_coefficient_mu     0.887 
# Absorption correction 

loop_
_exptl_crystal_face_index_h 
_exptl_crystal_face_index_k 
_exptl_crystal_face_index_l 
_exptl_crystal_face_perp_dist 
    1    0    0  0.083
    0   -1    0  0.140
   -1    0    0  0.129
    0    1    0  0.114
    0    0   -1  0.116
    0    0    1  0.090
    0    1   -1  0.101
    0   -1    1  0.118
   -1    1    0  0.098


_exptl_absorpt_correction_type 'integration' 
_exptl_absorpt_correction_T_min  0.806
_exptl_absorpt_correction_T_max  0.867
_exptl_absorpt_process_details
;
Gaussian integration (Coppens, 1970)
; 
 
_diffrn_ambient_temperature       150(1) 
_diffrn_radiation_wavelength      0.71073 
_diffrn_radiation_type            MoK\a 
_diffrn_radiation_source          'fine-focus sealed tube' 
_diffrn_radiation_monochromator   graphite 
_diffrn_measurement_device_type   'Bruker Nonius KappaCCD area detector' 
_diffrn_measurement_method        '\f and \w scans to fill the Ewald sphere'  
_diffrn_detector_area_resol_mean  9.091
_diffrn_standards_number          0
_diffrn_standards_interval_count  ? 
_diffrn_standards_interval_time   ? 
_diffrn_standards_decay_%         ? 
_diffrn_reflns_number             16299 
_diffrn_reflns_av_R_equivalents   0.0340 
_diffrn_reflns_av_sigmaI/netI     0.0248 
_diffrn_reflns_limit_h_min        -11 
_diffrn_reflns_limit_h_max        9 
_diffrn_reflns_limit_k_min        -23 
_diffrn_reflns_limit_k_max        23 
_diffrn_reflns_limit_l_min        -17 
_diffrn_reflns_limit_l_max        17 
_diffrn_reflns_theta_min          2.23 
_diffrn_reflns_theta_max          29.50 
_reflns_number_total              4080 
_reflns_number_gt                 3555 
_reflns_threshold_expression      >2sigma(I) 
 
_computing_data_collection        
'COLLECT (Hooft, 1998) and DENZO (Otwinowski & Minor, 1997)'
_computing_cell_refinement        'COLLECT and DENZO' 
_computing_data_reduction         'COLLECT and DENZO' 
_computing_structure_solution     'SIR92 (Altomare et al., 1994)' 
_computing_structure_refinement   'SHELXL-97 (Sheldrick, 1997)' 
_computing_molecular_graphics     'PLATON (Spek, 2003)'
_computing_publication_material   'SHELXL-97 (Sheldrick, 2008)' 
 
_refine_special_details 
; 
 Refinement of F^2^ against ALL reflections.  The weighted R-factor wR and 
 goodness of fit S are based on F^2^, conventional R-factors R are based 
 on F, with F set to zero for negative F^2^. The threshold expression of 
 F^2^ > 2sigma(F^2^) is used only for calculating R-factors(gt) etc. and is 
 not relevant to the choice of reflections for refinement.  R-factors based 
 on F^2^ are statistically about twice as large as those based on F, and R- 
 factors based on ALL data will be even larger. 
; 
 
_refine_ls_structure_factor_coef  Fsqd  
_refine_ls_matrix_type            full 
_refine_ls_weighting_scheme       calc  
_refine_ls_weighting_details 
 'calc w=1/[\s^2^(Fo^2^)+(0.0203P)^2^+1.3690P] where P=(Fo^2^+2Fc^2^)/3' 
_atom_sites_solution_primary      direct 
_atom_sites_solution_secondary    difmap 
_atom_sites_solution_hydrogens    geom 
_refine_ls_hydrogen_treatment     constr 
_refine_ls_extinction_method      none 
_refine_ls_extinction_coef        ? 
_refine_ls_number_reflns          4080 
_refine_ls_number_parameters      190 
_refine_ls_number_restraints      0 
_refine_ls_R_factor_all           0.0343 
_refine_ls_R_factor_gt            0.0259 
_refine_ls_wR_factor_ref          0.0627 
_refine_ls_wR_factor_gt           0.0576 
_refine_ls_goodness_of_fit_ref    1.126 
_refine_ls_restrained_S_all       1.126 
_refine_ls_shift/su_max           0.002 
_refine_ls_shift/su_mean          0.000 
 
loop_ 
 _atom_site_label 
 _atom_site_type_symbol 
 _atom_site_fract_x 
 _atom_site_fract_y 
 _atom_site_fract_z 
 _atom_site_U_iso_or_equiv 
 _atom_site_adp_type 
 _atom_site_occupancy 
 _atom_site_symmetry_multiplicity 
 _atom_site_calc_flag 
 _atom_site_refinement_flags 
 _atom_site_disorder_assembly 
 _atom_site_disorder_group 
Mo1 Mo 0.52124(2) 0.237355(9) 0.851715(15) 0.01791(5) Uani 1 1 d . . . 
O2 O 0.8940(3) 0.29711(10) 0.85694(17) 0.0368(4) Uani 1 1 d . . . 
O1 O 0.7282(3) 0.33488(10) 1.09529(15) 0.0372(4) Uani 1 1 d . . . 
C18 C 0.7574(3) 0.27451(12) 0.8557(2) 0.0250(4) Uani 1 1 d . . . 
C10 C 0.5574(3) 0.12913(11) 0.97861(18) 0.0213(4) Uani 1 1 d . . . 
H10 H 0.5457 0.1524 1.0395 0.026 Uiso 1 1 d R . . 
C2 C 0.1624(3) 0.23620(13) 0.7507(2) 0.0278(4) Uani 1 1 d . . . 
H2 H 0.0986 0.2070 0.7798 0.033 Uiso 1 1 d R . . 
C6 C 0.4084(3) 0.07778(10) 0.87841(17) 0.0190(3) Uani 1 1 d . . . 
C12 C 0.1280(3) -0.00391(12) 0.75118(19) 0.0266(4) Uani 1 1 d . . . 
H12 H 0.0135 -0.0295 0.7354 0.032 Uiso 1 1 d R . . 
C17 C 0.6564(3) 0.29670(12) 1.00814(19) 0.0247(4) Uani 1 1 d . . . 
C7 C 0.4677(3) 0.06903(11) 0.79352(18) 0.0200(4) Uani 1 1 d . . . 
C15 C 0.1687(3) 0.05354(12) 0.9452(2) 0.0261(4) Uani 1 1 d . . . 
H15A H 0.2796 0.0438 1.0291 0.031 Uiso 1 1 d R . . 
H15B H 0.0611 0.0184 0.9238 0.031 Uiso 1 1 d R . . 
H15C H 0.1227 0.1057 0.9387 0.031 Uiso 1 1 d R . . 
C9 C 0.7218(3) 0.13676(11) 0.96528(19) 0.0235(4) Uani 1 1 d . . . 
H9 H 0.8516 0.1527 1.0262 0.028 Uiso 1 1 d R . . 
C8 C 0.6499(3) 0.11556(11) 0.84068(19) 0.0231(4) Uani 1 1 d . . . 
H8 H 0.7083 0.1285 0.7973 0.028 Uiso 1 1 d R . . 
C3 C 0.2034(3) 0.21237(13) 0.6631(2) 0.0280(4) Uani 1 1 d . . . 
H3 H 0.1695 0.1648 0.6228 0.034 Uiso 1 1 d R . . 
C5 C 0.3201(3) 0.33643(12) 0.7215(2) 0.0293(4) Uani 1 1 d . . . 
H5 H 0.3757 0.3846 0.7262 0.035 Uiso 1 1 d R . . 
C11 C 0.2360(3) 0.04236(11) 0.85777(18) 0.0208(4) Uani 1 1 d . . . 
C1 C 0.2357(3) 0.31236(13) 0.7879(2) 0.0288(4) Uani 1 1 d . . . 
H1 H 0.2292 0.3418 0.8461 0.035 Uiso 1 1 d R . . 
C14 C 0.3566(3) 0.02415(11) 0.68670(19) 0.0248(4) Uani 1 1 d . . . 
C4 C 0.3046(3) 0.27345(13) 0.6457(2) 0.0291(4) Uani 1 1 d . . . 
H4 H 0.3526 0.2725 0.5942 0.035 Uiso 1 1 d R . . 
C16 C 0.4137(4) 0.01808(14) 0.5932(2) 0.0353(5) Uani 1 1 d . . . 
H16A H 0.3334 -0.0209 0.5326 0.042 Uiso 1 1 d R . . 
H16B H 0.5534 0.0045 0.6354 0.042 Uiso 1 1 d R . . 
H16C H 0.3913 0.0669 0.5521 0.042 Uiso 1 1 d R . . 
C13 C 0.1871(4) -0.01292(12) 0.66858(19) 0.0287(4) Uani 1 1 d . . . 
H13 H 0.1111 -0.0444 0.5991 0.034 Uiso 1 1 d R . . 
 
loop_ 
 _atom_site_aniso_label 
 _atom_site_aniso_U_11 
 _atom_site_aniso_U_22 
 _atom_site_aniso_U_33 
 _atom_site_aniso_U_23 
 _atom_site_aniso_U_13 
 _atom_site_aniso_U_12 
Mo1 0.01542(8) 0.01903(8) 0.01845(8) 0.00118(6) 0.00882(6) 0.00111(6) 
O2 0.0328(9) 0.0384(9) 0.0497(10) -0.0008(8) 0.0293(8) -0.0048(7) 
O1 0.0297(9) 0.0416(9) 0.0312(8) -0.0113(7) 0.0111(7) 0.0041(7) 
C18 0.0238(10) 0.0255(10) 0.0271(10) -0.0002(8) 0.0148(9) 0.0001(8) 
C10 0.0217(9) 0.0223(9) 0.0178(8) 0.0007(7) 0.0097(8) 0.0029(7) 
C2 0.0143(9) 0.0320(10) 0.0306(10) 0.0089(9) 0.0083(8) 0.0037(8) 
C6 0.0211(9) 0.0173(8) 0.0173(8) 0.0028(7) 0.0098(7) 0.0045(7) 
C12 0.0267(11) 0.0231(10) 0.0273(10) 0.0014(8) 0.0132(9) -0.0048(8) 
C17 0.0197(9) 0.0266(10) 0.0258(10) 0.0009(8) 0.0113(8) 0.0038(8) 
C7 0.0231(9) 0.0186(8) 0.0202(9) 0.0036(7) 0.0132(8) 0.0064(7) 
C15 0.0279(11) 0.0260(10) 0.0304(10) 0.0029(8) 0.0199(9) 0.0019(8) 
C9 0.0181(9) 0.0232(9) 0.0242(9) 0.0037(8) 0.0086(8) 0.0035(7) 
C8 0.0237(10) 0.0235(9) 0.0271(10) 0.0036(8) 0.0172(9) 0.0050(7) 
C3 0.0216(10) 0.0245(9) 0.0243(10) 0.0012(8) 0.0040(8) 0.0025(8) 
C5 0.0261(11) 0.0230(10) 0.0287(10) 0.0069(8) 0.0088(9) 0.0025(8) 
C11 0.0233(9) 0.0183(8) 0.0222(9) 0.0037(7) 0.0134(8) 0.0024(7) 
C1 0.0226(10) 0.0308(11) 0.0276(10) 0.0024(8) 0.0104(9) 0.0092(8) 
C14 0.0353(11) 0.0194(9) 0.0225(9) 0.0019(7) 0.0178(9) 0.0043(8) 
C4 0.0286(11) 0.0327(12) 0.0210(9) 0.0066(8) 0.0106(9) 0.0047(9) 
C16 0.0544(16) 0.0307(11) 0.0310(11) -0.0031(9) 0.0300(12) 0.0011(10) 
C13 0.0393(13) 0.0206(9) 0.0214(9) -0.0023(8) 0.0138(9) -0.0030(8) 
 
_geom_special_details 
; 
 All esds (except the esd in the dihedral angle between two l.s. planes) 
 are estimated using the full covariance matrix.  The cell esds are taken 
 into account individually in the estimation of esds in distances, angles 
 and torsion angles; correlations between esds in cell parameters are only 
 used when they are defined by crystal symmetry.  An approximate (isotropic) 
 treatment of cell esds is used for estimating esds involving l.s. planes. 
; 
 
loop_ 
 _geom_bond_atom_site_label_1 
 _geom_bond_atom_site_label_2 
 _geom_bond_distance 
 _geom_bond_site_symmetry_2 
 _geom_bond_publ_flag 
Mo1 C18 1.962(2) . ? 
Mo1 C17 1.969(2) . ? 
Mo1 C9 2.2680(19) . ? 
Mo1 C4 2.314(2) . ? 
Mo1 C5 2.314(2) . ? 
Mo1 C1 2.339(2) . ? 
Mo1 C8 2.3819(19) . ? 
Mo1 C3 2.389(2) . ? 
Mo1 C10 2.3957(19) . ? 
Mo1 C2 2.400(2) . ? 
O2 C18 1.148(3) . ? 
O1 C17 1.146(3) . ? 
C10 C9 1.418(3) . ? 
C10 C6 1.474(3) . ? 
C10 H10 0.9299 . ? 
C2 C3 1.397(3) . ? 
C2 C1 1.414(3) . ? 
C2 H2 0.9301 . ? 
C6 C11 1.389(3) . ? 
C6 C7 1.417(2) . ? 
C12 C13 1.388(3) . ? 
C12 C11 1.401(3) . ? 
C12 H12 0.9300 . ? 
C7 C14 1.391(3) . ? 
C7 C8 1.467(3) . ? 
C15 C11 1.502(3) . ? 
C15 H15A 0.9600 . ? 
C15 H15B 0.9600 . ? 
C15 H15C 0.9600 . ? 
C9 C8 1.422(3) . ? 
C9 H9 0.9301 . ? 
C8 H8 0.9299 . ? 
C3 C4 1.420(3) . ? 
C3 H3 0.9300 . ? 
C5 C1 1.411(3) . ? 
C5 C4 1.422(3) . ? 
C5 H5 0.9300 . ? 
C1 H1 0.9301 . ? 
C14 C13 1.393(3) . ? 
C14 C16 1.507(3) . ? 
C4 H4 0.9299 . ? 
C16 H16A 0.9600 . ? 
C16 H16B 0.9600 . ? 
C16 H16C 0.9602 . ? 
C13 H13 0.9300 . ? 
 
loop_ 
 _geom_angle_atom_site_label_1 
 _geom_angle_atom_site_label_2 
 _geom_angle_atom_site_label_3 
 _geom_angle 
 _geom_angle_site_symmetry_1 
 _geom_angle_site_symmetry_3 
 _geom_angle_publ_flag 
C18 Mo1 C17 80.01(9) . . ? 
C18 Mo1 C9 84.85(8) . . ? 
C17 Mo1 C9 87.01(8) . . ? 
C18 Mo1 C4 92.28(9) . . ? 
C17 Mo1 C4 132.28(8) . . ? 
C9 Mo1 C4 139.55(8) . . ? 
C18 Mo1 C5 92.69(8) . . ? 
C17 Mo1 C5 97.12(8) . . ? 
C9 Mo1 C5 174.77(8) . . ? 
C4 Mo1 C5 35.79(8) . . ? 
C18 Mo1 C1 124.06(8) . . ? 
C17 Mo1 C1 86.96(8) . . ? 
C9 Mo1 C1 148.77(8) . . ? 
C4 Mo1 C1 58.78(8) . . ? 
C5 Mo1 C1 35.30(8) . . ? 
C18 Mo1 C8 81.59(8) . . ? 
C17 Mo1 C8 120.79(8) . . ? 
C9 Mo1 C8 35.50(7) . . ? 
C4 Mo1 C8 104.13(8) . . ? 
C5 Mo1 C8 139.58(8) . . ? 
C1 Mo1 C8 146.83(8) . . ? 
C18 Mo1 C3 123.32(8) . . ? 
C17 Mo1 C3 143.97(8) . . ? 
C9 Mo1 C3 119.39(8) . . ? 
C4 Mo1 C3 35.11(8) . . ? 
C5 Mo1 C3 58.39(8) . . ? 
C1 Mo1 C3 57.56(8) . . ? 
C8 Mo1 C3 91.66(8) . . ? 
C18 Mo1 C10 119.05(8) . . ? 
C17 Mo1 C10 85.32(8) . . ? 
C9 Mo1 C10 35.26(7) . . ? 
C4 Mo1 C10 136.52(7) . . ? 
C5 Mo1 C10 147.99(7) . . ? 
C1 Mo1 C10 113.64(7) . . ? 
C8 Mo1 C10 56.97(7) . . ? 
C3 Mo1 C10 102.27(7) . . ? 
C18 Mo1 C2 148.77(8) . . ? 
C17 Mo1 C2 112.01(8) . . ? 
C9 Mo1 C2 123.22(7) . . ? 
C4 Mo1 C2 57.90(8) . . ? 
C5 Mo1 C2 58.12(8) . . ? 
C1 Mo1 C2 34.69(8) . . ? 
C8 Mo1 C2 112.53(8) . . ? 
C3 Mo1 C2 33.92(8) . . ? 
C10 Mo1 C2 91.28(7) . . ? 
O2 C18 Mo1 179.0(2) . . ? 
C9 C10 C6 107.56(16) . . ? 
C9 C10 Mo1 67.44(11) . . ? 
C6 C10 Mo1 97.98(11) . . ? 
C9 C10 H10 126.2 . . ? 
C6 C10 H10 126.3 . . ? 
Mo1 C10 H10 101.9 . . ? 
C3 C2 C1 108.19(19) . . ? 
C3 C2 Mo1 72.61(12) . . ? 
C1 C2 Mo1 70.30(12) . . ? 
C3 C2 H2 126.0 . . ? 
C1 C2 H2 125.8 . . ? 
Mo1 C2 H2 122.6 . . ? 
C11 C6 C7 121.31(18) . . ? 
C11 C6 C10 131.84(17) . . ? 
C7 C6 C10 106.83(17) . . ? 
C13 C12 C11 122.0(2) . . ? 
C13 C12 H12 119.0 . . ? 
C11 C12 H12 119.0 . . ? 
O1 C17 Mo1 175.98(19) . . ? 
C14 C7 C6 121.39(18) . . ? 
C14 C7 C8 131.34(18) . . ? 
C6 C7 C8 107.25(17) . . ? 
C11 C15 H15A 109.5 . . ? 
C11 C15 H15B 109.6 . . ? 
H15A C15 H15B 109.5 . . ? 
C11 C15 H15C 109.4 . . ? 
H15A C15 H15C 109.5 . . ? 
H15B C15 H15C 109.5 . . ? 
C10 C9 C8 106.73(17) . . ? 
C10 C9 Mo1 77.29(11) . . ? 
C8 C9 Mo1 76.63(11) . . ? 
C10 C9 H9 126.7 . . ? 
C8 C9 H9 126.6 . . ? 
Mo1 C9 H9 112.0 . . ? 
C9 C8 C7 107.44(17) . . ? 
C9 C8 Mo1 67.87(11) . . ? 
C7 C8 Mo1 98.65(12) . . ? 
C9 C8 H8 126.2 . . ? 
C7 C8 H8 126.3 . . ? 
Mo1 C8 H8 101.3 . . ? 
C2 C3 C4 108.3(2) . . ? 
C2 C3 Mo1 73.47(12) . . ? 
C4 C3 Mo1 69.54(12) . . ? 
C2 C3 H3 125.9 . . ? 
C4 C3 H3 125.9 . . ? 
Mo1 C3 H3 123.1 . . ? 
C1 C5 C4 107.42(19) . . ? 
C1 C5 Mo1 73.33(12) . . ? 
C4 C5 Mo1 72.09(12) . . ? 
C1 C5 H5 126.4 . . ? 
C4 C5 H5 126.2 . . ? 
Mo1 C5 H5 120.1 . . ? 
C6 C11 C12 116.63(17) . . ? 
C6 C11 C15 121.55(18) . . ? 
C12 C11 C15 121.82(18) . . ? 
C5 C1 C2 108.37(19) . . ? 
C5 C1 Mo1 71.37(12) . . ? 
C2 C1 Mo1 75.02(12) . . ? 
C5 C1 H1 125.6 . . ? 
C2 C1 H1 126.0 . . ? 
Mo1 C1 H1 119.7 . . ? 
C7 C14 C13 116.88(18) . . ? 
C7 C14 C16 121.4(2) . . ? 
C13 C14 C16 121.7(2) . . ? 
C3 C4 C5 107.7(2) . . ? 
C3 C4 Mo1 75.36(12) . . ? 
C5 C4 Mo1 72.12(12) . . ? 
C3 C4 H4 126.2 . . ? 
C5 C4 H4 126.1 . . ? 
Mo1 C4 H4 118.2 . . ? 
C14 C16 H16A 109.7 . . ? 
C14 C16 H16B 109.3 . . ? 
H16A C16 H16B 109.5 . . ? 
C14 C16 H16C 109.4 . . ? 
H16A C16 H16C 109.5 . . ? 
H16B C16 H16C 109.5 . . ? 
C12 C13 C14 121.75(19) . . ? 
C12 C13 H13 119.1 . . ? 
C14 C13 H13 119.1 . . ? 
 
_diffrn_measured_fraction_theta_max    0.993 
_diffrn_reflns_theta_full              29.50 
_diffrn_measured_fraction_theta_full   0.993 
_refine_diff_density_max    0.470 
_refine_diff_density_min   -0.530 
_refine_diff_density_rms    0.083 
#===END

 
data_11

 
_audit_creation_method            SHELXL-97 
_chemical_name_systematic 
; 
 ? 
; 
_chemical_name_common             ? 
_chemical_melting_point           ? 
_chemical_formula_moiety          'C8 H5 Cl Mo O3' 
_chemical_formula_sum 
 'C8 H5 Cl Mo O3' 
_chemical_formula_weight          280.51 
 
loop_ 
 _atom_type_symbol 
 _atom_type_description 
 _atom_type_scat_dispersion_real 
 _atom_type_scat_dispersion_imag 
 _atom_type_scat_source 
 'C'  'C'   0.0033   0.0016 
 'International Tables Vol C Tables 4.2.6.8 and 6.1.1.4' 
 'H'  'H'   0.0000   0.0000 
 'International Tables Vol C Tables 4.2.6.8 and 6.1.1.4' 
 'O'  'O'   0.0106   0.0060 
 'International Tables Vol C Tables 4.2.6.8 and 6.1.1.4' 
 'Cl'  'Cl'   0.1484   0.1585 
 'International Tables Vol C Tables 4.2.6.8 and 6.1.1.4' 
 'Mo'  'Mo'  -1.6832   0.6857 
 'International Tables Vol C Tables 4.2.6.8 and 6.1.1.4' 
 
_symmetry_cell_setting            'monoclinic' 
_symmetry_space_group_name_H-M    'P 21/c' 
_symmetry_space_group_name_Hall   '-P 2ybc' 
 
loop_ 
 _symmetry_equiv_pos_as_xyz 
 'x, y, z' 
 '-x, y+1/2, -z+1/2' 
 '-x, -y, -z' 
 'x, -y-1/2, z-1/2' 
 
_cell_length_a                    6.5640(3) 
_cell_length_b                    11.8450(6) 
_cell_length_c                    13.0911(5) 
_cell_angle_alpha                 90 
_cell_angle_beta                  109.471(4) 
_cell_angle_gamma                 90 
_cell_volume                      959.63(8) 
_cell_formula_units_Z             4 
_cell_measurement_temperature     150(1) 
_cell_measurement_reflns_used     10098 
_cell_measurement_theta_min       1 
_cell_measurement_theta_max       28.5 
 
_exptl_crystal_description        'block' 
_exptl_crystal_colour             'orange' 
_exptl_crystal_size_max           0.28 
_exptl_crystal_size_mid           0.24 
_exptl_crystal_size_min           0.20 
_exptl_crystal_density_meas       ? 
_exptl_crystal_density_diffrn     1.942 
_exptl_crystal_density_method     'not measured' 
_exptl_crystal_F_000              544 
_exptl_absorpt_coefficient_mu     1.613 
# Absorption correction 

loop_
_exptl_crystal_face_index_h 
_exptl_crystal_face_index_k 
_exptl_crystal_face_index_l 
_exptl_crystal_face_perp_dist 
    0   -1    0  0.064
    0    1    0  0.141
   -1    0    0  0.108
    1    0    0  0.070
    0    0    1  0.070
    0    0   -1  0.099
   -1    1    0  0.113


_exptl_absorpt_correction_type 'integration' 
_exptl_absorpt_correction_T_min  0.711
_exptl_absorpt_correction_T_max  0.798
_exptl_absorpt_process_details
;
Gaussian integration (Coppens, 1970)
;
 
 
_diffrn_ambient_temperature       150(1) 
_diffrn_radiation_wavelength      0.71073 
_diffrn_radiation_type            MoK\a 
_diffrn_radiation_source          'fine-focus sealed tube' 
_diffrn_radiation_monochromator   graphite 
_diffrn_measurement_device_type   'Bruker Nonius KappaCCD area detector' 
_diffrn_measurement_method        '\f and \w scans to fill the Ewald sphere'  
_diffrn_detector_area_resol_mean  9.091
_diffrn_standards_number          0 
_diffrn_standards_interval_count  ? 
_diffrn_standards_interval_time   ? 
_diffrn_standards_decay_%         ? 
_diffrn_reflns_number             10089 
_diffrn_reflns_av_R_equivalents   0.0975 
_diffrn_reflns_av_sigmaI/netI     0.0567 
_diffrn_reflns_limit_h_min        -8 
_diffrn_reflns_limit_h_max        8 
_diffrn_reflns_limit_k_min        -15 
_diffrn_reflns_limit_k_max        15 
_diffrn_reflns_limit_l_min        -17 
_diffrn_reflns_limit_l_max        17 
_diffrn_reflns_theta_min          2.38 
_diffrn_reflns_theta_max          28.50 
_reflns_number_total              2415 
_reflns_number_gt                 1935 
_reflns_threshold_expression      >2sigma(I) 
 
_computing_data_collection        
'COLLECT (Hooft, 1998) and DENZO (Otwinowski & Minor, 1997)'
_computing_cell_refinement        'COLLECT and DENZO' 
_computing_data_reduction         'COLLECT and DENZO' 
_computing_structure_solution     'SIR92 (Altomare et al., 1994)' 
_computing_structure_refinement   'SHELXL-97 (Sheldrick, 1997)' 
_computing_molecular_graphics     'PLATON (Spek, 2003)'
_computing_publication_material   'SHELXL-97 (Sheldrick, 2008)' 
 
_refine_special_details 
; 
 Refinement of F^2^ against ALL reflections.  The weighted R-factor wR and 
 goodness of fit S are based on F^2^, conventional R-factors R are based 
 on F, with F set to zero for negative F^2^. The threshold expression of 
 F^2^ > 2sigma(F^2^) is used only for calculating R-factors(gt) etc. and is 
 not relevant to the choice of reflections for refinement.  R-factors based 
 on F^2^ are statistically about twice as large as those based on F, and R- 
 factors based on ALL data will be even larger. 
; 
 
_refine_ls_structure_factor_coef  Fsqd  
_refine_ls_matrix_type            full 
_refine_ls_weighting_scheme       calc  
_refine_ls_weighting_details 
 'calc w=1/[\s^2^(Fo^2^)+(0.0145P)^2^+2.1091P] where P=(Fo^2^+2Fc^2^)/3' 
_atom_sites_solution_primary      direct 
_atom_sites_solution_secondary    difmap 
_atom_sites_solution_hydrogens    geom 
_refine_ls_hydrogen_treatment     constr 
_refine_ls_extinction_method      none 
_refine_ls_extinction_coef        ? 
_refine_ls_number_reflns          2415 
_refine_ls_number_parameters      118 
_refine_ls_number_restraints      0 
_refine_ls_R_factor_all           0.0565 
_refine_ls_R_factor_gt            0.0409 
_refine_ls_wR_factor_ref          0.1011 
_refine_ls_wR_factor_gt           0.0880 
_refine_ls_goodness_of_fit_ref    1.108 
_refine_ls_restrained_S_all       1.108 
_refine_ls_shift/su_max           0.001 
_refine_ls_shift/su_mean          0.000 
 
loop_ 
 _atom_site_label 
 _atom_site_type_symbol 
 _atom_site_fract_x 
 _atom_site_fract_y 
 _atom_site_fract_z 
 _atom_site_U_iso_or_equiv 
 _atom_site_adp_type 
 _atom_site_occupancy 
 _atom_site_symmetry_multiplicity 
 _atom_site_calc_flag 
 _atom_site_refinement_flags 
 _atom_site_disorder_assembly 
 _atom_site_disorder_group 
Mo1 Mo 0.65477(6) 0.20998(3) 0.24778(3) 0.03881(13) Uani 1 1 d . . . 
Cl1 Cl 0.3460(2) 0.32675(12) 0.25955(13) 0.0704(4) Uani 1 1 d . . . 
C2 C 0.7274(11) 0.2819(4) 0.0969(5) 0.0644(16) Uani 1 1 d . . . 
H2 H 0.7870 0.3530 0.0958 0.077 Uiso 1 1 d R . . 
C6 C 0.5095(8) 0.1053(4) 0.3221(4) 0.0545(12) Uani 1 1 d . . . 
O2 O 1.0349(8) 0.0826(5) 0.4166(4) 0.1002(16) Uani 1 1 d . . . 
C7 C 0.8979(9) 0.1300(5) 0.3540(5) 0.0640(14) Uani 1 1 d . . . 
C4 C 0.4856(10) 0.1403(6) 0.0751(4) 0.0697(16) Uani 1 1 d . . . 
H4 H 0.3555 0.1014 0.0584 0.084 Uiso 1 1 d R . . 
C5 C 0.6918(11) 0.0942(4) 0.1168(5) 0.0662(16) Uani 1 1 d . . . 
H5 H 0.7237 0.0182 0.1319 0.079 Uiso 1 1 d R . . 
C8 C 0.8077(9) 0.3357(5) 0.3454(4) 0.0575(13) Uani 1 1 d . . . 
O3 O 0.8968(8) 0.4089(4) 0.3979(4) 0.0918(15) Uani 1 1 d . . . 
O1 O 0.4257(8) 0.0438(3) 0.3611(4) 0.0879(15) Uani 1 1 d . . . 
C1 C 0.8441(9) 0.1821(5) 0.1320(4) 0.0606(14) Uani 1 1 d . . . 
H1 H 0.9936 0.1752 0.1602 0.073 Uiso 1 1 d R . . 
C3 C 0.5112(11) 0.2566(6) 0.0631(4) 0.0710(16) Uani 1 1 d . . . 
H3 H 0.3993 0.3083 0.0373 0.085 Uiso 1 1 d R . . 
 
loop_ 
 _atom_site_aniso_label 
 _atom_site_aniso_U_11 
 _atom_site_aniso_U_22 
 _atom_site_aniso_U_33 
 _atom_site_aniso_U_23 
 _atom_site_aniso_U_13 
 _atom_site_aniso_U_12 
Mo1 0.0435(2) 0.0340(2) 0.0404(2) -0.00528(15) 0.01592(18) -0.00446(15) 
Cl1 0.0652(9) 0.0546(7) 0.0984(12) -0.0104(7) 0.0368(9) 0.0095(6) 
C2 0.101(5) 0.051(3) 0.052(3) -0.004(2) 0.041(3) -0.011(3) 
C6 0.062(3) 0.044(3) 0.066(3) -0.011(2) 0.032(3) -0.005(2) 
O2 0.076(3) 0.128(4) 0.090(3) 0.040(3) 0.019(3) 0.024(3) 
C7 0.058(3) 0.075(4) 0.064(3) 0.012(3) 0.026(3) 0.007(3) 
C4 0.072(4) 0.089(4) 0.042(3) -0.021(3) 0.012(3) -0.025(3) 
C5 0.109(5) 0.041(3) 0.061(3) -0.009(2) 0.044(3) 0.002(3) 
C8 0.060(3) 0.066(3) 0.046(3) -0.013(3) 0.017(2) -0.018(3) 
O3 0.108(4) 0.087(3) 0.083(3) -0.039(3) 0.037(3) -0.050(3) 
O1 0.120(4) 0.057(2) 0.121(4) -0.010(2) 0.086(3) -0.022(2) 
C1 0.063(3) 0.074(4) 0.055(3) -0.007(3) 0.033(3) 0.000(3) 
C3 0.091(5) 0.079(4) 0.039(3) 0.007(3) 0.017(3) 0.021(4) 
 
_geom_special_details 
; 
 All esds (except the esd in the dihedral angle between two l.s. planes) 
 are estimated using the full covariance matrix.  The cell esds are taken 
 into account individually in the estimation of esds in distances, angles 
 and torsion angles; correlations between esds in cell parameters are only 
 used when they are defined by crystal symmetry.  An approximate (isotropic) 
 treatment of cell esds is used for estimating esds involving l.s. planes. 
; 
 
loop_ 
 _geom_bond_atom_site_label_1 
 _geom_bond_atom_site_label_2 
 _geom_bond_distance 
 _geom_bond_site_symmetry_2 
 _geom_bond_publ_flag 
Mo1 C7 1.975(6) . ? 
Mo1 C8 2.001(5) . ? 
Mo1 C6 2.002(5) . ? 
Mo1 C5 2.271(5) . ? 
Mo1 C1 2.281(5) . ? 
Mo1 C4 2.313(5) . ? 
Mo1 C2 2.342(5) . ? 
Mo1 C3 2.349(5) . ? 
Mo1 Cl1 2.5007(13) . ? 
C2 C3 1.372(8) . ? 
C2 C1 1.401(8) . ? 
C2 H2 0.9300 . ? 
C6 O1 1.132(6) . ? 
O2 C7 1.141(6) . ? 
C4 C5 1.392(8) . ? 
C4 C3 1.402(9) . ? 
C4 H4 0.9300 . ? 
C5 C1 1.410(8) . ? 
C5 H5 0.9300 . ? 
C8 O3 1.139(6) . ? 
C1 H1 0.9300 . ? 
C3 H3 0.9300 . ? 
 
loop_ 
 _geom_angle_atom_site_label_1 
 _geom_angle_atom_site_label_2 
 _geom_angle_atom_site_label_3 
 _geom_angle 
 _geom_angle_site_symmetry_1 
 _geom_angle_site_symmetry_3 
 _geom_angle_publ_flag 
C7 Mo1 C8 78.0(2) . . ? 
C7 Mo1 C6 76.4(2) . . ? 
C8 Mo1 C6 111.7(2) . . ? 
C7 Mo1 C5 88.7(2) . . ? 
C8 Mo1 C5 140.8(2) . . ? 
C6 Mo1 C5 100.4(2) . . ? 
C7 Mo1 C1 84.7(2) . . ? 
C8 Mo1 C1 105.3(2) . . ? 
C6 Mo1 C1 133.3(2) . . ? 
C5 Mo1 C1 36.10(19) . . ? 
C7 Mo1 C4 122.0(2) . . ? 
C8 Mo1 C4 149.9(2) . . ? 
C6 Mo1 C4 95.9(2) . . ? 
C5 Mo1 C4 35.3(2) . . ? 
C1 Mo1 C4 59.3(2) . . ? 
C7 Mo1 C2 115.1(2) . . ? 
C8 Mo1 C2 93.9(2) . . ? 
C6 Mo1 C2 154.0(2) . . ? 
C5 Mo1 C2 58.66(18) . . ? 
C1 Mo1 C2 35.2(2) . . ? 
C4 Mo1 C2 58.1(2) . . ? 
C7 Mo1 C3 142.2(2) . . ? 
C8 Mo1 C3 115.2(2) . . ? 
C6 Mo1 C3 123.6(2) . . ? 
C5 Mo1 C3 58.1(2) . . ? 
C1 Mo1 C3 58.1(2) . . ? 
C4 Mo1 C3 35.0(2) . . ? 
C2 Mo1 C3 34.0(2) . . ? 
C7 Mo1 Cl1 134.71(17) . . ? 
C8 Mo1 Cl1 78.07(17) . . ? 
C6 Mo1 Cl1 77.61(14) . . ? 
C5 Mo1 Cl1 132.34(18) . . ? 
C1 Mo1 Cl1 138.86(16) . . ? 
C4 Mo1 Cl1 97.03(17) . . ? 
C2 Mo1 Cl1 104.35(16) . . ? 
C3 Mo1 Cl1 83.00(16) . . ? 
C3 C2 C1 108.3(5) . . ? 
C3 C2 Mo1 73.3(3) . . ? 
C1 C2 Mo1 70.0(3) . . ? 
C3 C2 H2 126.0 . . ? 
C1 C2 H2 125.6 . . ? 
Mo1 C2 H2 123.1 . . ? 
O1 C6 Mo1 177.7(5) . . ? 
O2 C7 Mo1 178.3(5) . . ? 
C5 C4 C3 107.0(5) . . ? 
C5 C4 Mo1 70.7(3) . . ? 
C3 C4 Mo1 73.9(3) . . ? 
C5 C4 H4 126.4 . . ? 
C3 C4 H4 126.6 . . ? 
Mo1 C4 H4 120.8 . . ? 
C4 C5 C1 108.4(5) . . ? 
C4 C5 Mo1 74.0(3) . . ? 
C1 C5 Mo1 72.4(3) . . ? 
C4 C5 H5 125.7 . . ? 
C1 C5 H5 125.8 . . ? 
Mo1 C5 H5 119.8 . . ? 
O3 C8 Mo1 177.4(5) . . ? 
C2 C1 C5 107.1(5) . . ? 
C2 C1 Mo1 74.7(3) . . ? 
C5 C1 Mo1 71.6(3) . . ? 
C2 C1 H1 126.4 . . ? 
C5 C1 H1 126.6 . . ? 
Mo1 C1 H1 119.1 . . ? 
C2 C3 C4 109.2(5) . . ? 
C2 C3 Mo1 72.7(3) . . ? 
C4 C3 Mo1 71.1(3) . . ? 
C2 C3 H3 125.4 . . ? 
C4 C3 H3 125.3 . . ? 
Mo1 C3 H3 121.8 . . ? 
 
_diffrn_measured_fraction_theta_max    0.995 
_diffrn_reflns_theta_full              28.50 
_diffrn_measured_fraction_theta_full   0.995 
_refine_diff_density_max    0.729 
_refine_diff_density_min   -0.849 
_refine_diff_density_rms    0.114 
#===END

 
data_12

_audit_creation_method            SHELXL-97 
_chemical_name_systematic 
; 
 ? 
; 
_chemical_name_common             ? 
_chemical_melting_point           ? 
_chemical_formula_moiety          'C15 H15 Cl5 Mo3 O2' 
_chemical_formula_sum 
 'C15 H15 Cl5 Mo3 O2' 
_chemical_formula_weight          692.34 
 
loop_ 
 _atom_type_symbol 
 _atom_type_description 
 _atom_type_scat_dispersion_real 
 _atom_type_scat_dispersion_imag 
 _atom_type_scat_source 
 'C'  'C'   0.0033   0.0016 
 'International Tables Vol C Tables 4.2.6.8 and 6.1.1.4' 
 'H'  'H'   0.0000   0.0000 
 'International Tables Vol C Tables 4.2.6.8 and 6.1.1.4' 
 'Cl'  'Cl'   0.1484   0.1585 
 'International Tables Vol C Tables 4.2.6.8 and 6.1.1.4' 
 'Mo'  'Mo'  -1.6832   0.6857 
 'International Tables Vol C Tables 4.2.6.8 and 6.1.1.4' 
 'O'  'O'   0.0106   0.0060 
 'International Tables Vol C Tables 4.2.6.8 and 6.1.1.4' 
 
_symmetry_cell_setting            'monoclinic' 
_symmetry_space_group_name_H-M    'P 21/c' 
_symmetry_space_group_name_Hall   '-P 2ybc'
 
loop_ 
 _symmetry_equiv_pos_as_xyz 
 'x, y, z' 
 '-x, y+1/2, -z+1/2' 
 '-x, -y, -z' 
 'x, -y-1/2, z-1/2' 
 
_cell_length_a                    14.7850(8) 
_cell_length_b                    10.2589(7) 
_cell_length_c                    12.4190(9) 
_cell_angle_alpha                 90 
_cell_angle_beta                  91.446(5) 
_cell_angle_gamma                 90 
_cell_volume                      1883.1(2) 
_cell_formula_units_Z             4 
_cell_measurement_temperature     150(1) 
_cell_measurement_reflns_used     27679 
_cell_measurement_theta_min       1 
_cell_measurement_theta_max       27.5 
 
_exptl_crystal_description        'needle' 
_exptl_crystal_colour             'dark red' 
_exptl_crystal_size_max           0.29 
_exptl_crystal_size_mid           0.08 
_exptl_crystal_size_min           0.07 
_exptl_crystal_density_meas       ? 
_exptl_crystal_density_diffrn     2.442 
_exptl_crystal_density_method     'not measured' 
_exptl_crystal_F_000              1328 
_exptl_absorpt_coefficient_mu     2.684 
# Absorption correction 

loop_
_exptl_crystal_face_index_h 
_exptl_crystal_face_index_k 
_exptl_crystal_face_index_l 
_exptl_crystal_face_perp_dist 
    0    0   -1  0.013
    0    0    1  0.042
   -1    0    0  0.072
    1    0    0  0.145
    0    1    0  0.022
    0   -1    0  0.037


_exptl_absorpt_correction_type 'integration' 
_exptl_absorpt_correction_T_min  0.681
_exptl_absorpt_correction_T_max  0.867
_exptl_absorpt_process_details
;
Gaussian integration (Coppens, 1970)
;
 
_diffrn_ambient_temperature       150(1) 
_diffrn_radiation_wavelength      0.71073 
_diffrn_radiation_type            MoK\a 
_diffrn_radiation_source          'fine-focus sealed tube' 
_diffrn_radiation_monochromator   graphite 
_diffrn_measurement_device_type   'Bruker Nonius KappaCCD area detector' 
_diffrn_measurement_method        '\f and \w scans to fill the Ewald sphere'  
_diffrn_detector_area_resol_mean  9.091
_diffrn_standards_number          0
_diffrn_standards_interval_count  ? 
_diffrn_standards_interval_time   ? 
_diffrn_standards_decay_%         ? 
_diffrn_reflns_number             27600 
_diffrn_reflns_av_R_equivalents   0.0639 
_diffrn_reflns_av_sigmaI/netI     0.0407 
_diffrn_reflns_limit_h_min        -19 
_diffrn_reflns_limit_h_max        19 
_diffrn_reflns_limit_k_min        -13 
_diffrn_reflns_limit_k_max        13 
_diffrn_reflns_limit_l_min        -16 
_diffrn_reflns_limit_l_max        15 
_diffrn_reflns_theta_min          2.42 
_diffrn_reflns_theta_max          27.50 
_reflns_number_total              4317 
_reflns_number_gt                 3414 
_reflns_threshold_expression      >2sigma(I) 
 
_computing_data_collection        
'COLLECT (Hooft, 1998) and DENZO (Otwinowski & Minor, 1997)'
_computing_cell_refinement        'COLLECT and DENZO' 
_computing_data_reduction         'COLLECT and DENZO' 
_computing_structure_solution     'SIR92 (Altomare et al., 1994)' 
_computing_structure_refinement   'SHELXL-97 (Sheldrick, 1997)' 
_computing_molecular_graphics     'PLATON (Spek, 2003)'
_computing_publication_material   'SHELXL-97 (Sheldrick, 2008)' 
 
_refine_special_details 
; 
 Refinement of F^2^ against ALL reflections.  The weighted R-factor wR and 
 goodness of fit S are based on F^2^, conventional R-factors R are based 
 on F, with F set to zero for negative F^2^. The threshold expression of 
 F^2^ > 2sigma(F^2^) is used only for calculating R-factors(gt) etc. and is 
 not relevant to the choice of reflections for refinement.  R-factors based 
 on F^2^ are statistically about twice as large as those based on F, and R- 
 factors based on ALL data will be even larger. 
; 
 
_refine_ls_structure_factor_coef  Fsqd  
_refine_ls_matrix_type            full 
_refine_ls_weighting_scheme       calc  
_refine_ls_weighting_details 
 'calc w=1/[\s^2^(Fo^2^)+(0.0169P)^2^+7.3227P] where P=(Fo^2^+2Fc^2^)/3' 
_atom_sites_solution_primary      direct 
_atom_sites_solution_secondary    difmap 
_atom_sites_solution_hydrogens    geom 
_refine_ls_hydrogen_treatment     constr 
_refine_ls_extinction_method      none 
_refine_ls_extinction_coef        ? 
_refine_ls_number_reflns          4317 
_refine_ls_number_parameters      226 
_refine_ls_number_restraints      0 
_refine_ls_R_factor_all           0.0600 
_refine_ls_R_factor_gt            0.0382 
_refine_ls_wR_factor_ref          0.0733 
_refine_ls_wR_factor_gt           0.0660 
_refine_ls_goodness_of_fit_ref    1.137 
_refine_ls_restrained_S_all       1.137 
_refine_ls_shift/su_max           0.001 
_refine_ls_shift/su_mean          0.000 
 
loop_ 
 _atom_site_label 
 _atom_site_type_symbol 
 _atom_site_fract_x 
 _atom_site_fract_y 
 _atom_site_fract_z 
 _atom_site_U_iso_or_equiv 
 _atom_site_adp_type 
 _atom_site_occupancy 
 _atom_site_symmetry_multiplicity 
 _atom_site_calc_flag 
 _atom_site_refinement_flags 
 _atom_site_disorder_assembly 
 _atom_site_disorder_group 
Mo3 Mo 0.15919(3) 0.15261(4) 0.32242(3) 0.02060(10) Uani 1 1 d . . . 
Mo2 Mo 0.32747(3) 0.21500(4) 0.39554(3) 0.01862(10) Uani 1 1 d . . . 
Mo1 Mo 0.25534(3) -0.02878(4) 0.44803(3) 0.01989(10) Uani 1 1 d . . . 
Cl2 Cl 0.09232(9) -0.03718(14) 0.40924(11) 0.0316(3) Uani 1 1 d . . . 
Cl3 Cl 0.20790(10) -0.08094(14) 0.62925(10) 0.0344(3) Uani 1 1 d . . . 
Cl4 Cl 0.45694(9) 0.13165(14) 0.29583(11) 0.0349(3) Uani 1 1 d . . . 
Cl1 Cl 0.38542(8) 0.07299(13) 0.54053(11) 0.0298(3) Uani 1 1 d . . . 
Cl5 Cl 0.14496(10) 0.01288(15) 0.16016(10) 0.0388(3) Uani 1 1 d . . . 
O1 O 0.2147(2) 0.1566(3) 0.4727(2) 0.0198(7) Uani 1 1 d . . . 
O2 O 0.2704(2) 0.2072(3) 0.2498(3) 0.0261(8) Uani 1 1 d . . . 
C9 C 0.4245(4) 0.4052(5) 0.3753(5) 0.0369(14) Uani 1 1 d . . . 
H9 H 0.4725 0.4069 0.3284 0.044 Uiso 1 1 d R . . 
C8 C 0.3359(4) 0.4450(5) 0.3525(4) 0.0335(13) Uani 1 1 d . . . 
H8 H 0.3132 0.4782 0.2876 0.040 Uiso 1 1 d R . . 
C5 C 0.3789(4) -0.1414(6) 0.3793(5) 0.0380(14) Uani 1 1 d . . . 
H5 H 0.4368 -0.1057 0.3829 0.046 Uiso 1 1 d R . . 
C6 C 0.3436(4) 0.3739(5) 0.5267(4) 0.0313(12) Uani 1 1 d . . . 
H6 H 0.3285 0.3525 0.5967 0.038 Uiso 1 1 d R . . 
C7 C 0.2866(4) 0.4243(5) 0.4477(4) 0.0311(12) Uani 1 1 d . . . 
H7 H 0.2254 0.4420 0.4556 0.037 Uiso 1 1 d R . . 
C1 C 0.3391(4) -0.2189(6) 0.4603(5) 0.0426(15) Uani 1 1 d . . . 
H1 H 0.3656 -0.2439 0.5258 0.051 Uiso 1 1 d R . . 
C2 C 0.2520(4) -0.2514(5) 0.4218(5) 0.0423(16) Uani 1 1 d . . . 
H2 H 0.2101 -0.3017 0.4579 0.051 Uiso 1 1 d R . . 
C11 C 0.0721(4) 0.3264(6) 0.3934(5) 0.0395(15) Uani 1 1 d . . . 
H11 H 0.0848 0.3555 0.4630 0.047 Uiso 1 1 d R . . 
C15 C 0.1107(4) 0.3732(6) 0.2998(5) 0.0392(15) Uani 1 1 d . . . 
H15 H 0.1527 0.4405 0.2965 0.047 Uiso 1 1 d R . . 
C3 C 0.2383(4) -0.1967(6) 0.3195(5) 0.0404(15) Uani 1 1 d . . . 
H3 H 0.1864 -0.2052 0.2763 0.048 Uiso 1 1 d R . . 
C14 C 0.0775(4) 0.3036(7) 0.2126(5) 0.0443(16) Uani 1 1 d . . . 
H14 H 0.0925 0.3153 0.1410 0.053 Uiso 1 1 d R . . 
C4 C 0.3173(4) -0.1252(6) 0.2934(4) 0.0342(13) Uani 1 1 d . . . 
H4 H 0.3258 -0.0774 0.2308 0.041 Uiso 1 1 d R . . 
C12 C 0.0116(4) 0.2287(7) 0.3631(6) 0.0488(18) Uani 1 1 d . . . 
H12 H -0.0252 0.1827 0.4093 0.059 Uiso 1 1 d R . . 
C10 C 0.4274(4) 0.3615(6) 0.4831(5) 0.0357(13) Uani 1 1 d . . . 
H10 H 0.4788 0.3294 0.5189 0.043 Uiso 1 1 d R . . 
C13 C 0.0162(4) 0.2113(7) 0.2514(6) 0.0488(17) Uani 1 1 d . . . 
H13 H -0.0160 0.1503 0.2104 0.059 Uiso 1 1 d R . . 
 
loop_ 
 _atom_site_aniso_label 
 _atom_site_aniso_U_11 
 _atom_site_aniso_U_22 
 _atom_site_aniso_U_33 
 _atom_site_aniso_U_23 
 _atom_site_aniso_U_13 
 _atom_site_aniso_U_12 
Mo3 0.0185(2) 0.0242(2) 0.0190(2) 0.00449(17) -0.00030(16) -0.00081(17) 
Mo2 0.0204(2) 0.0181(2) 0.0174(2) 0.00033(16) 0.00068(16) 0.00100(17) 
Mo1 0.0214(2) 0.0172(2) 0.0210(2) -0.00044(17) -0.00036(17) 0.00061(17) 
Cl2 0.0296(7) 0.0338(7) 0.0314(7) 0.0034(6) 0.0001(6) -0.0057(6) 
Cl3 0.0483(8) 0.0301(7) 0.0249(6) 0.0065(5) 0.0020(6) -0.0049(6) 
Cl4 0.0267(6) 0.0388(8) 0.0397(7) -0.0008(6) 0.0117(6) 0.0066(6) 
Cl1 0.0275(6) 0.0290(7) 0.0324(7) 0.0062(5) -0.0088(5) -0.0017(5) 
Cl5 0.0467(8) 0.0480(9) 0.0215(6) -0.0027(6) -0.0017(6) -0.0156(7) 
O1 0.0226(17) 0.0206(17) 0.0161(15) 0.0028(13) 0.0011(14) 0.0026(14) 
O2 0.0152(16) 0.031(2) 0.0325(19) -0.0140(16) -0.0030(15) 0.0001(14) 
C9 0.041(3) 0.021(3) 0.049(4) -0.008(3) 0.018(3) -0.014(2) 
C8 0.061(4) 0.013(3) 0.026(3) 0.002(2) -0.003(3) -0.008(2) 
C5 0.030(3) 0.034(3) 0.050(4) -0.004(3) 0.008(3) 0.013(3) 
C6 0.045(3) 0.023(3) 0.026(3) -0.007(2) 0.000(3) -0.006(2) 
C7 0.043(3) 0.013(2) 0.037(3) -0.007(2) 0.007(3) 0.001(2) 
C1 0.046(4) 0.027(3) 0.055(4) -0.001(3) 0.002(3) 0.016(3) 
C2 0.054(4) 0.012(3) 0.062(4) -0.005(3) 0.018(3) -0.001(3) 
C11 0.037(3) 0.040(4) 0.041(3) 0.008(3) 0.005(3) 0.022(3) 
C15 0.029(3) 0.034(3) 0.054(4) 0.013(3) -0.002(3) 0.013(2) 
C3 0.044(3) 0.031(3) 0.046(4) -0.021(3) 0.003(3) -0.003(3) 
C14 0.042(3) 0.055(4) 0.035(3) 0.024(3) -0.011(3) 0.010(3) 
C4 0.043(3) 0.031(3) 0.029(3) -0.010(2) 0.009(3) 0.002(3) 
C12 0.023(3) 0.051(4) 0.073(5) 0.028(4) 0.011(3) 0.009(3) 
C10 0.035(3) 0.029(3) 0.042(3) -0.001(3) -0.011(3) -0.012(2) 
C13 0.025(3) 0.056(4) 0.064(4) 0.012(4) -0.022(3) 0.006(3) 
 
_geom_special_details 
; 
 All esds (except the esd in the dihedral angle between two l.s. planes) 
 are estimated using the full covariance matrix.  The cell esds are taken 
 into account individually in the estimation of esds in distances, angles 
 and torsion angles; correlations between esds in cell parameters are only 
 used when they are defined by crystal symmetry.  An approximate (isotropic) 
 treatment of cell esds is used for estimating esds involving l.s. planes. 
; 
 
loop_ 
 _geom_bond_atom_site_label_1 
 _geom_bond_atom_site_label_2 
 _geom_bond_distance 
 _geom_bond_site_symmetry_2 
 _geom_bond_publ_flag 
Mo3 O2 1.976(3) . ? 
Mo3 O1 2.021(3) . ? 
Mo3 C13 2.349(5) . ? 
Mo3 C14 2.374(5) . ? 
Mo3 C11 2.381(6) . ? 
Mo3 C12 2.383(6) . ? 
Mo3 C15 2.388(6) . ? 
Mo3 Cl2 2.4465(14) . ? 
Mo3 Cl5 2.4776(14) . ? 
Mo3 Mo2 2.7037(6) . ? 
Mo3 Mo1 2.7938(6) . ? 
Mo2 O2 1.979(3) . ? 
Mo2 O1 2.034(3) . ? 
Mo2 C6 2.313(5) . ? 
Mo2 C7 2.327(5) . ? 
Mo2 C10 2.355(5) . ? 
Mo2 C8 2.424(5) . ? 
Mo2 C9 2.438(5) . ? 
Mo2 Cl1 2.4537(13) . ? 
Mo2 Cl4 2.4594(13) . ? 
Mo2 Mo1 2.8022(6) . ? 
Mo1 O1 2.020(3) . ? 
Mo1 C2 2.307(5) . ? 
Mo1 C1 2.313(6) . ? 
Mo1 C5 2.341(5) . ? 
Mo1 C3 2.357(6) . ? 
Mo1 C4 2.366(5) . ? 
Mo1 Cl3 2.4337(14) . ? 
Mo1 Cl2 2.4474(14) . ? 
Mo1 Cl1 2.4489(13) . ? 
C9 C8 1.394(8) . ? 
C9 C10 1.412(8) . ? 
C9 H9 0.9301 . ? 
C8 C7 1.420(8) . ? 
C8 H8 0.9300 . ? 
C5 C4 1.396(8) . ? 
C5 C1 1.422(9) . ? 
C5 H5 0.9302 . ? 
C6 C10 1.372(8) . ? 
C6 C7 1.377(8) . ? 
C6 H6 0.9299 . ? 
C7 H7 0.9300 . ? 
C1 C2 1.402(9) . ? 
C1 H1 0.9300 . ? 
C2 C3 1.399(9) . ? 
C2 H2 0.9299 . ? 
C11 C12 1.388(9) . ? 
C11 C15 1.393(8) . ? 
C11 H11 0.9300 . ? 
C15 C14 1.377(9) . ? 
C15 H15 0.9301 . ? 
C3 C4 1.423(8) . ? 
C3 H3 0.9304 . ? 
C14 C13 1.405(9) . ? 
C14 H14 0.9300 . ? 
C4 H4 0.9300 . ? 
C12 C13 1.402(10) . ? 
C12 H12 0.9301 . ? 
C10 H10 0.9300 . ? 
C13 H13 0.9301 . ? 
 
loop_ 
 _geom_angle_atom_site_label_1 
 _geom_angle_atom_site_label_2 
 _geom_angle_atom_site_label_3 
 _geom_angle 
 _geom_angle_site_symmetry_1 
 _geom_angle_site_symmetry_3 
 _geom_angle_publ_flag 
O2 Mo3 O1 95.31(13) . . ? 
O2 Mo3 C13 120.5(2) . . ? 
O1 Mo3 C13 133.0(2) . . ? 
O2 Mo3 C14 88.28(19) . . ? 
O1 Mo3 C14 135.0(2) . . ? 
C13 Mo3 C14 34.6(2) . . ? 
O2 Mo3 C11 114.90(18) . . ? 
O1 Mo3 C11 81.60(18) . . ? 
C13 Mo3 C11 57.1(2) . . ? 
C14 Mo3 C11 56.8(2) . . ? 
O2 Mo3 C12 141.30(19) . . ? 
O1 Mo3 C12 98.7(2) . . ? 
C13 Mo3 C12 34.4(2) . . ? 
C14 Mo3 C12 56.8(2) . . ? 
C11 Mo3 C12 33.9(2) . . ? 
O2 Mo3 C15 85.91(18) . . ? 
O1 Mo3 C15 101.73(18) . . ? 
C13 Mo3 C15 56.5(2) . . ? 
C14 Mo3 C15 33.6(2) . . ? 
C11 Mo3 C15 34.0(2) . . ? 
C12 Mo3 C15 56.0(2) . . ? 
O2 Mo3 Cl2 140.97(11) . . ? 
O1 Mo3 Cl2 76.60(10) . . ? 
C13 Mo3 Cl2 89.97(18) . . ? 
C14 Mo3 Cl2 124.55(16) . . ? 
C11 Mo3 Cl2 101.78(15) . . ? 
C12 Mo3 Cl2 77.59(16) . . ? 
C15 Mo3 Cl2 133.03(15) . . ? 
O2 Mo3 Cl5 81.22(10) . . ? 
O1 Mo3 Cl5 141.93(10) . . ? 
C13 Mo3 Cl5 77.63(19) . . ? 
C14 Mo3 Cl5 83.02(18) . . ? 
C11 Mo3 Cl5 134.30(16) . . ? 
C12 Mo3 Cl5 107.6(2) . . ? 
C15 Mo3 Cl5 115.69(16) . . ? 
Cl2 Mo3 Cl5 82.59(5) . . ? 
O2 Mo3 Mo2 46.93(10) . . ? 
O1 Mo3 Mo2 48.39(9) . . ? 
C13 Mo3 Mo2 151.34(18) . . ? 
C14 Mo3 Mo2 119.28(16) . . ? 
C11 Mo3 Mo2 101.56(16) . . ? 
C12 Mo3 Mo2 133.69(19) . . ? 
C15 Mo3 Mo2 94.95(15) . . ? 
Cl2 Mo3 Mo2 114.77(4) . . ? 
Cl5 Mo3 Mo2 117.95(4) . . ? 
O2 Mo3 Mo1 91.50(10) . . ? 
O1 Mo3 Mo1 46.25(9) . . ? 
C13 Mo3 Mo1 145.17(17) . . ? 
C14 Mo3 Mo1 178.78(17) . . ? 
C11 Mo3 Mo1 124.35(15) . . ? 
C12 Mo3 Mo1 123.75(16) . . ? 
C15 Mo3 Mo1 147.55(16) . . ? 
Cl2 Mo3 Mo1 55.20(3) . . ? 
Cl5 Mo3 Mo1 95.76(4) . . ? 
Mo2 Mo3 Mo1 61.263(16) . . ? 
O2 Mo2 O1 94.80(13) . . ? 
O2 Mo2 C6 134.94(17) . . ? 
O1 Mo2 C6 86.94(17) . . ? 
O2 Mo2 C7 100.61(18) . . ? 
O1 Mo2 C7 85.35(17) . . ? 
C6 Mo2 C7 34.5(2) . . ? 
O2 Mo2 C10 134.12(18) . . ? 
O1 Mo2 C10 118.87(17) . . ? 
C6 Mo2 C10 34.2(2) . . ? 
C7 Mo2 C10 56.4(2) . . ? 
O2 Mo2 C8 82.00(17) . . ? 
O1 Mo2 C8 115.98(17) . . ? 
C6 Mo2 C8 57.57(19) . . ? 
C7 Mo2 C8 34.72(19) . . ? 
C10 Mo2 C8 56.3(2) . . ? 
O2 Mo2 C9 100.14(18) . . ? 
O1 Mo2 C9 140.85(16) . . ? 
C6 Mo2 C9 57.20(19) . . ? 
C7 Mo2 C9 56.5(2) . . ? 
C10 Mo2 C9 34.2(2) . . ? 
C8 Mo2 C9 33.3(2) . . ? 
O2 Mo2 Cl1 141.26(11) . . ? 
O1 Mo2 Cl1 75.78(9) . . ? 
C6 Mo2 Cl1 82.76(14) . . ? 
C7 Mo2 Cl1 115.59(14) . . ? 
C10 Mo2 Cl1 80.60(15) . . ? 
C8 Mo2 Cl1 136.14(14) . . ? 
C9 Mo2 Cl1 110.83(16) . . ? 
O2 Mo2 Cl4 81.07(10) . . ? 
O1 Mo2 Cl4 142.41(10) . . ? 
C6 Mo2 Cl4 122.15(15) . . ? 
C7 Mo2 Cl4 132.21(14) . . ? 
C10 Mo2 Cl4 88.10(15) . . ? 
C8 Mo2 Cl4 100.52(15) . . ? 
C9 Mo2 Cl4 76.05(14) . . ? 
Cl1 Mo2 Cl4 84.33(5) . . ? 
O2 Mo2 Mo3 46.83(10) . . ? 
O1 Mo2 Mo3 47.97(9) . . ? 
C6 Mo2 Mo3 118.74(14) . . ? 
C7 Mo2 Mo3 93.94(15) . . ? 
C10 Mo2 Mo3 150.20(15) . . ? 
C8 Mo2 Mo3 102.03(15) . . ? 
C9 Mo2 Mo3 133.89(15) . . ? 
Cl1 Mo2 Mo3 114.03(3) . . ? 
Cl4 Mo2 Mo3 118.03(4) . . ? 
O2 Mo2 Mo1 91.18(11) . . ? 
O1 Mo2 Mo1 46.07(9) . . ? 
C6 Mo2 Mo1 119.90(14) . . ? 
C7 Mo2 Mo1 130.97(14) . . ? 
C10 Mo2 Mo1 134.46(15) . . ? 
C8 Mo2 Mo1 160.45(15) . . ? 
C9 Mo2 Mo1 165.14(15) . . ? 
Cl1 Mo2 Mo1 55.06(3) . . ? 
Cl4 Mo2 Mo1 96.46(4) . . ? 
Mo3 Mo2 Mo1 60.954(16) . . ? 
O1 Mo1 C2 161.42(19) . . ? 
O1 Mo1 C1 160.81(19) . . ? 
C2 Mo1 C1 35.3(2) . . ? 
O1 Mo1 C5 139.25(18) . . ? 
C2 Mo1 C5 58.3(2) . . ? 
C1 Mo1 C5 35.6(2) . . ? 
O1 Mo1 C3 139.80(19) . . ? 
C2 Mo1 C3 34.9(2) . . ? 
C1 Mo1 C3 58.4(2) . . ? 
C5 Mo1 C3 57.6(2) . . ? 
O1 Mo1 C4 129.77(17) . . ? 
C2 Mo1 C4 58.6(2) . . ? 
C1 Mo1 C4 58.9(2) . . ? 
C5 Mo1 C4 34.5(2) . . ? 
C3 Mo1 C4 35.1(2) . . ? 
O1 Mo1 Cl3 88.44(9) . . ? 
C2 Mo1 Cl3 84.68(17) . . ? 
C1 Mo1 Cl3 85.41(17) . . ? 
C5 Mo1 Cl3 118.33(16) . . ? 
C3 Mo1 Cl3 115.92(16) . . ? 
C4 Mo1 Cl3 141.76(15) . . ? 
O1 Mo1 Cl2 76.59(10) . . ? 
C2 Mo1 Cl2 85.40(17) . . ? 
C1 Mo1 Cl2 120.41(17) . . ? 
C5 Mo1 Cl2 133.22(16) . . ? 
C3 Mo1 Cl2 75.72(16) . . ? 
C4 Mo1 Cl2 103.01(15) . . ? 
Cl3 Mo1 Cl2 82.47(5) . . ? 
O1 Mo1 Cl1 76.13(10) . . ? 
C2 Mo1 Cl1 120.14(18) . . ? 
C1 Mo1 Cl1 85.17(17) . . ? 
C5 Mo1 Cl1 76.72(16) . . ? 
C3 Mo1 Cl1 134.28(16) . . ? 
C4 Mo1 Cl1 104.09(15) . . ? 
Cl3 Mo1 Cl1 84.33(5) . . ? 
Cl2 Mo1 Cl1 149.90(5) . . ? 
O1 Mo1 Mo3 46.27(9) . . ? 
C2 Mo1 Mo3 124.87(18) . . ? 
C1 Mo1 Mo3 149.58(17) . . ? 
C5 Mo1 Mo3 121.06(15) . . ? 
C3 Mo1 Mo3 93.71(17) . . ? 
C4 Mo1 Mo3 91.56(15) . . ? 
Cl3 Mo1 Mo3 120.55(4) . . ? 
Cl2 Mo1 Mo3 55.17(3) . . ? 
Cl1 Mo1 Mo3 111.13(3) . . ? 
O1 Mo1 Mo2 46.48(9) . . ? 
C2 Mo1 Mo2 149.04(16) . . ? 
C1 Mo1 Mo2 124.17(16) . . ? 
C5 Mo1 Mo2 92.89(16) . . ? 
C3 Mo1 Mo2 121.96(16) . . ? 
C4 Mo1 Mo2 91.54(14) . . ? 
Cl3 Mo1 Mo2 122.11(4) . . ? 
Cl2 Mo1 Mo2 111.37(4) . . ? 
Cl1 Mo1 Mo2 55.22(3) . . ? 
Mo3 Mo1 Mo2 57.783(15) . . ? 
Mo3 Cl2 Mo1 69.62(4) . . ? 
Mo1 Cl1 Mo2 69.72(4) . . ? 
Mo1 O1 Mo3 87.48(13) . . ? 
Mo1 O1 Mo2 87.45(12) . . ? 
Mo3 O1 Mo2 83.64(11) . . ? 
Mo3 O2 Mo2 86.25(14) . . ? 
C8 C9 C10 107.0(5) . . ? 
C8 C9 Mo2 72.8(3) . . ? 
C10 C9 Mo2 69.6(3) . . ? 
C8 C9 H9 126.7 . . ? 
C10 C9 H9 126.4 . . ? 
Mo2 C9 H9 122.7 . . ? 
C9 C8 C7 106.7(5) . . ? 
C9 C8 Mo2 73.9(3) . . ? 
C7 C8 Mo2 68.9(3) . . ? 
C9 C8 H8 126.8 . . ? 
C7 C8 H8 126.5 . . ? 
Mo2 C8 H8 121.9 . . ? 
C4 C5 C1 109.4(6) . . ? 
C4 C5 Mo1 73.7(3) . . ? 
C1 C5 Mo1 71.1(3) . . ? 
C4 C5 H5 124.8 . . ? 
C1 C5 H5 125.7 . . ? 
Mo1 C5 H5 120.9 . . ? 
C10 C6 C7 107.2(5) . . ? 
C10 C6 Mo2 74.6(3) . . ? 
C7 C6 Mo2 73.3(3) . . ? 
C10 C6 H6 126.0 . . ? 
C7 C6 H6 126.8 . . ? 
Mo2 C6 H6 118.0 . . ? 
C6 C7 C8 109.4(5) . . ? 
C6 C7 Mo2 72.2(3) . . ? 
C8 C7 Mo2 76.4(3) . . ? 
C6 C7 H7 125.3 . . ? 
C8 C7 H7 125.4 . . ? 
Mo2 C7 H7 118.0 . . ? 
C2 C1 C5 106.6(6) . . ? 
C2 C1 Mo1 72.1(3) . . ? 
C5 C1 Mo1 73.3(3) . . ? 
C2 C1 H1 126.6 . . ? 
C5 C1 H1 126.8 . . ? 
Mo1 C1 H1 120.2 . . ? 
C3 C2 C1 108.9(6) . . ? 
C3 C2 Mo1 74.5(3) . . ? 
C1 C2 Mo1 72.5(3) . . ? 
C3 C2 H2 125.3 . . ? 
C1 C2 H2 125.8 . . ? 
Mo1 C2 H2 119.6 . . ? 
C12 C11 C15 107.3(6) . . ? 
C12 C11 Mo3 73.1(4) . . ? 
C15 C11 Mo3 73.3(3) . . ? 
C12 C11 H11 126.8 . . ? 
C15 C11 H11 125.9 . . ? 
Mo3 C11 H11 119.1 . . ? 
C14 C15 C11 109.4(6) . . ? 
C14 C15 Mo3 72.6(4) . . ? 
C11 C15 Mo3 72.8(3) . . ? 
C14 C15 H15 125.1 . . ? 
C11 C15 H15 125.5 . . ? 
Mo3 C15 H15 120.7 . . ? 
C2 C3 C4 108.3(6) . . ? 
C2 C3 Mo1 70.6(3) . . ? 
C4 C3 Mo1 72.8(3) . . ? 
C2 C3 H3 125.8 . . ? 
C4 C3 H3 125.9 . . ? 
Mo1 C3 H3 122.1 . . ? 
C15 C14 C13 107.4(6) . . ? 
C15 C14 Mo3 73.8(3) . . ? 
C13 C14 Mo3 71.7(3) . . ? 
C15 C14 H14 126.6 . . ? 
C13 C14 H14 125.9 . . ? 
Mo3 C14 H14 120.3 . . ? 
C5 C4 C3 106.7(5) . . ? 
C5 C4 Mo1 71.8(3) . . ? 
C3 C4 Mo1 72.1(3) . . ? 
C5 C4 H4 127.0 . . ? 
C3 C4 H4 126.2 . . ? 
Mo1 C4 H4 121.4 . . ? 
C11 C12 C13 108.3(6) . . ? 
C11 C12 Mo3 73.0(3) . . ? 
C13 C12 Mo3 71.5(3) . . ? 
C11 C12 H12 125.6 . . ? 
C13 C12 H12 126.1 . . ? 
Mo3 C12 H12 121.2 . . ? 
C6 C10 C9 109.8(5) . . ? 
C6 C10 Mo2 71.2(3) . . ? 
C9 C10 Mo2 76.1(3) . . ? 
C6 C10 H10 125.4 . . ? 
C9 C10 H10 124.9 . . ? 
Mo2 C10 H10 119.3 . . ? 
C12 C13 C14 107.5(6) . . ? 
C12 C13 Mo3 74.1(3) . . ? 
C14 C13 Mo3 73.7(3) . . ? 
C12 C13 H13 126.2 . . ? 
C14 C13 H13 126.2 . . ? 
Mo3 C13 H13 118.4 . . ? 
 
_diffrn_measured_fraction_theta_max    0.997 
_diffrn_reflns_theta_full              27.50 
_diffrn_measured_fraction_theta_full   0.997 
_refine_diff_density_max    1.133 
_refine_diff_density_min   -0.674 
_refine_diff_density_rms    0.153 
#===END


 
data_14

_audit_creation_method            SHELXL-97 
_chemical_name_systematic 
; 
 ? 
; 
_chemical_name_common             ? 
_chemical_melting_point           ? 
_chemical_formula_moiety          'C18 H14 Mo O4' 
_chemical_formula_sum 
 'C18 H14 Mo O4' 
_chemical_formula_weight          390.23 
 
loop_ 
 _atom_type_symbol 
 _atom_type_description 
 _atom_type_scat_dispersion_real 
 _atom_type_scat_dispersion_imag 
 _atom_type_scat_source 
 'C'  'C'   0.0033   0.0016 
 'International Tables Vol C Tables 4.2.6.8 and 6.1.1.4' 
 'H'  'H'   0.0000   0.0000 
 'International Tables Vol C Tables 4.2.6.8 and 6.1.1.4' 
 'O'  'O'   0.0106   0.0060 
 'International Tables Vol C Tables 4.2.6.8 and 6.1.1.4' 
 'Mo'  'Mo'  -1.6832   0.6857 
 'International Tables Vol C Tables 4.2.6.8 and 6.1.1.4' 
 
_symmetry_cell_setting            'monoclinic' 
_symmetry_space_group_name_H-M    'P 21/c' 
_symmetry_space_group_name_Hall   '-P 2ybc'
 
loop_ 
 _symmetry_equiv_pos_as_xyz 
 'x, y, z' 
 '-x, y+1/2, -z+1/2' 
 '-x, -y, -z' 
 'x, -y-1/2, z-1/2' 
 
_cell_length_a                    13.3410(6) 
_cell_length_b                    6.2910(4) 
_cell_length_c                    19.7231(7) 
_cell_angle_alpha                 90 
_cell_angle_beta                  112.192(4) 
_cell_angle_gamma                 90 
_cell_volume                      1532.70(14) 
_cell_formula_units_Z             4 
_cell_measurement_temperature     150(1) 
_cell_measurement_reflns_used     11500 
_cell_measurement_theta_min       1 
_cell_measurement_theta_max       27.5 
 
_exptl_crystal_description        'block' 
_exptl_crystal_colour             'red' 
_exptl_crystal_size_max           0.28 
_exptl_crystal_size_mid           0.23 
_exptl_crystal_size_min           0.16 
_exptl_crystal_density_meas       ? 
_exptl_crystal_density_diffrn     1.691 
_exptl_crystal_density_method     'not measured' 
_exptl_crystal_F_000              784 
_exptl_absorpt_coefficient_mu     0.873 
# Absorption correction 

loop_
_exptl_crystal_face_index_h 
_exptl_crystal_face_index_k 
_exptl_crystal_face_index_l 
_exptl_crystal_face_perp_dist 
    0    0   -1  0.079
    0    0    1  0.057
   -1    0    0  0.062
    1    0    0  0.107
    0    1    0  0.140
    0   -1    0  0.110
   -1    0    1  0.070
    1    0   -1  0.109
    1    0    1  0.075


_exptl_absorpt_correction_type 'integration' 
_exptl_absorpt_correction_T_min  0.826
_exptl_absorpt_correction_T_max  0.907
_exptl_absorpt_process_details
;
Gaussian integration (Coppens, 1970)
;
 
_diffrn_ambient_temperature       150(1) 
_diffrn_radiation_wavelength      0.71073 
_diffrn_radiation_type            MoK\a 
_diffrn_radiation_source          'fine-focus sealed tube' 
_diffrn_radiation_monochromator   graphite 
_diffrn_measurement_device_type   'Bruker Nonius KappaCCD area detector' 
_diffrn_measurement_method        '\f and \w scans to fill the Ewald sphere'  
_diffrn_detector_area_resol_mean  9.091
_diffrn_standards_number          0
_diffrn_standards_interval_count  ? 
_diffrn_standards_interval_time   ? 
_diffrn_standards_decay_%         ? 
_diffrn_reflns_number             11440 
_diffrn_reflns_av_R_equivalents   0.0251 
_diffrn_reflns_av_sigmaI/netI     0.0238 
_diffrn_reflns_limit_h_min        -17 
_diffrn_reflns_limit_h_max        17 
_diffrn_reflns_limit_k_min        -8 
_diffrn_reflns_limit_k_max        7 
_diffrn_reflns_limit_l_min        -23 
_diffrn_reflns_limit_l_max        25 
_diffrn_reflns_theta_min          1.65 
_diffrn_reflns_theta_max          27.50 
_reflns_number_total              3458 
_reflns_number_gt                 2937 
_reflns_threshold_expression      >2sigma(I) 
 
_computing_data_collection        
'COLLECT (Hooft, 1998) and DENZO (Otwinowski & Minor, 1997)'
_computing_cell_refinement        'COLLECT and DENZO' 
_computing_data_reduction         'COLLECT and DENZO' 
_computing_structure_solution     'SIR92 (Altomare et al., 1994)' 
_computing_structure_refinement   'SHELXL-97 (Sheldrick, 1997)' 
_computing_molecular_graphics     'PLATON (Spek, 2003)'
_computing_publication_material   'SHELXL-97 (Sheldrick, 2008)' 
 
_refine_special_details 
;  
 Refinement of F^2^ against ALL reflections.  The weighted R-factor wR and 
 goodness of fit S are based on F^2^, conventional R-factors R are based 
 on F, with F set to zero for negative F^2^. The threshold expression of 
 F^2^ > 2sigma(F^2^) is used only for calculating R-factors(gt) etc. and is 
 not relevant to the choice of reflections for refinement.  R-factors based 
 on F^2^ are statistically about twice as large as those based on F, and R- 
 factors based on ALL data will be even larger. 
; 
 
_refine_ls_structure_factor_coef  Fsqd  
_refine_ls_matrix_type            full 
_refine_ls_weighting_scheme       calc  
_refine_ls_weighting_details 
 'calc w=1/[\s^2^(Fo^2^)+(0.0178P)^2^+1.8053P] where P=(Fo^2^+2Fc^2^)/3' 
_atom_sites_solution_primary      direct 
_atom_sites_solution_secondary    difmap 
_atom_sites_solution_hydrogens    geom 
_refine_ls_hydrogen_treatment     constr 
_refine_ls_extinction_method      none 
_refine_ls_extinction_coef        ? 
_refine_ls_number_reflns          3458 
_refine_ls_number_parameters      208 
_refine_ls_number_restraints      0 
_refine_ls_R_factor_all           0.0338 
_refine_ls_R_factor_gt            0.0248 
_refine_ls_wR_factor_ref          0.0587 
_refine_ls_wR_factor_gt           0.0528 
_refine_ls_goodness_of_fit_ref    1.109 
_refine_ls_restrained_S_all       1.109 
_refine_ls_shift/su_max           0.001 
_refine_ls_shift/su_mean          0.000 
 
loop_ 
 _atom_site_label 
 _atom_site_type_symbol 
 _atom_site_fract_x 
 _atom_site_fract_y 
 _atom_site_fract_z 
 _atom_site_U_iso_or_equiv 
 _atom_site_adp_type 
 _atom_site_occupancy 
 _atom_site_symmetry_multiplicity 
 _atom_site_calc_flag 
 _atom_site_refinement_flags 
 _atom_site_disorder_assembly 
 _atom_site_disorder_group 
Mo1 Mo 0.282001(13) 0.25773(3) 0.042025(9) 0.01389(6) Uani 1 1 d . . . 
O1 O 0.03667(17) 0.3186(3) -0.15417(9) 0.0405(5) Uani 1 1 d . . . 
C5 C 0.14505(16) 0.4911(4) 0.03844(12) 0.0202(4) Uani 1 1 d . . . 
H5 H 0.1585 0.6365 0.0405 0.024 Uiso 1 1 d R . . 
C15 C 0.31956(18) -0.1744(4) 0.20449(12) 0.0216(4) Uani 1 1 d . . . 
H15 H 0.3067 -0.3110 0.1851 0.026 Uiso 1 1 d R . . 
C11 C 0.38211(16) 0.1884(3) 0.20292(11) 0.0180(4) Uani 1 1 d . . . 
C8 C 0.39518(17) -0.0234(4) 0.11048(11) 0.0206(4) Uani 1 1 d . . . 
H8 H 0.3801 -0.1305 0.0755 0.025 Uiso 1 1 d R . . 
C3 C 0.13170(17) 0.1482(4) 0.07299(12) 0.0230(5) Uani 1 1 d . . . 
H3 H 0.1331 0.0295 0.1014 0.028 Uiso 1 1 d R . . 
O2 O 0.08800(13) 0.6442(3) -0.10691(8) 0.0266(4) Uani 1 1 d . . . 
O3 O 0.31068(17) 0.0273(3) -0.08946(10) 0.0384(5) Uani 1 1 d . . . 
O4 O 0.38840(15) 0.6041(3) -0.02132(10) 0.0309(4) Uani 1 1 d . . . 
C16 C 0.36209(16) -0.0196(3) 0.17336(11) 0.0176(4) Uani 1 1 d . . . 
C17 C 0.30252(19) 0.1073(4) -0.03989(12) 0.0228(5) Uani 1 1 d . . . 
C18 C 0.35169(17) 0.4776(3) 0.00423(12) 0.0199(4) Uani 1 1 d . . . 
C14 C 0.29598(19) -0.1213(4) 0.26548(13) 0.0269(5) Uani 1 1 d . . . 
H14 H 0.2677 -0.2240 0.2872 0.032 Uiso 1 1 d R . . 
C4 C 0.15730(17) 0.3574(4) 0.09875(12) 0.0213(5) Uani 1 1 d . . . 
H4 H 0.1787 0.4007 0.1473 0.026 Uiso 1 1 d R . . 
C9 C 0.45426(17) 0.1643(4) 0.11263(12) 0.0215(5) Uani 1 1 d . . . 
H9 H 0.5018 0.1874 0.0890 0.026 Uiso 1 1 d R . . 
C10 C 0.42696(17) 0.3114(4) 0.15761(11) 0.0189(4) Uani 1 1 d . . . 
H10 H 0.4360 0.4581 0.1584 0.023 Uiso 1 1 d R . . 
C12 C 0.35745(18) 0.2403(4) 0.26326(11) 0.0223(4) Uani 1 1 d . . . 
H12 H 0.3692 0.3770 0.2826 0.027 Uiso 1 1 d R . . 
C13 C 0.3143(2) 0.0824(4) 0.29394(12) 0.0272(5) Uani 1 1 d . . . 
H13 H 0.2979 0.1146 0.3346 0.033 Uiso 1 1 d R . . 
C6 C 0.07480(18) 0.4352(4) -0.10225(12) 0.0239(5) Uani 1 1 d . . . 
C2 C 0.10303(17) 0.1493(4) -0.00376(12) 0.0224(5) Uani 1 1 d . . . 
H2 H 0.0842 0.0313 -0.0344 0.027 Uiso 1 1 d R . . 
C1 C 0.10862(17) 0.3642(4) -0.02569(12) 0.0193(4) Uani 1 1 d . . . 
C7 C 0.0492(2) 0.7301(5) -0.18049(13) 0.0349(6) Uani 1 1 d . . . 
H7A H 0.0838 0.6579 -0.2087 0.042 Uiso 1 1 d R . . 
H7B H 0.0658 0.8791 -0.1784 0.042 Uiso 1 1 d R . . 
H7C H -0.0277 0.7106 -0.2031 0.042 Uiso 1 1 d R . . 
 
loop_ 
 _atom_site_aniso_label 
 _atom_site_aniso_U_11 
 _atom_site_aniso_U_22 
 _atom_site_aniso_U_33 
 _atom_site_aniso_U_23 
 _atom_site_aniso_U_13 
 _atom_site_aniso_U_12 
Mo1 0.01371(9) 0.01506(10) 0.01297(9) -0.00004(7) 0.00512(6) 0.00023(7) 
O1 0.0545(12) 0.0386(10) 0.0186(8) -0.0031(8) 0.0027(8) -0.0014(10) 
C5 0.0156(9) 0.0231(11) 0.0216(11) -0.0003(9) 0.0066(8) 0.0046(9) 
C15 0.0236(11) 0.0167(10) 0.0214(11) 0.0020(8) 0.0050(9) -0.0007(9) 
C11 0.0143(9) 0.0200(10) 0.0162(10) 0.0004(8) 0.0020(8) 0.0006(8) 
C8 0.0235(11) 0.0214(11) 0.0157(10) 0.0005(8) 0.0060(8) 0.0063(9) 
C3 0.0140(10) 0.0315(12) 0.0235(11) 0.0067(10) 0.0071(8) -0.0015(9) 
O2 0.0287(8) 0.0298(9) 0.0189(8) 0.0049(7) 0.0064(7) 0.0024(7) 
O3 0.0656(13) 0.0309(10) 0.0257(9) 0.0000(8) 0.0253(9) 0.0109(9) 
O4 0.0417(10) 0.0236(9) 0.0368(10) 0.0042(7) 0.0254(8) -0.0024(8) 
C16 0.0172(10) 0.0184(10) 0.0154(10) 0.0018(8) 0.0039(8) 0.0039(8) 
C17 0.0309(12) 0.0180(10) 0.0212(11) 0.0045(9) 0.0117(9) 0.0045(9) 
C18 0.0219(10) 0.0191(10) 0.0197(10) -0.0016(8) 0.0092(9) 0.0034(9) 
C14 0.0263(12) 0.0305(13) 0.0258(12) 0.0112(10) 0.0121(10) 0.0020(10) 
C4 0.0146(10) 0.0336(12) 0.0172(10) -0.0002(9) 0.0077(8) 0.0038(9) 
C9 0.0155(10) 0.0282(12) 0.0204(11) 0.0060(9) 0.0065(8) 0.0053(9) 
C10 0.0170(10) 0.0198(10) 0.0164(10) 0.0012(8) 0.0024(8) -0.0011(8) 
C12 0.0263(11) 0.0216(11) 0.0164(10) -0.0019(9) 0.0051(8) 0.0041(10) 
C13 0.0297(12) 0.0370(14) 0.0182(11) 0.0051(10) 0.0129(9) 0.0092(11) 
C6 0.0193(10) 0.0311(12) 0.0189(11) 0.0004(9) 0.0046(9) 0.0031(10) 
C2 0.0137(10) 0.0277(12) 0.0238(11) -0.0023(9) 0.0050(9) -0.0052(9) 
C1 0.0137(9) 0.0244(11) 0.0180(10) 0.0002(9) 0.0039(8) 0.0013(9) 
C7 0.0378(14) 0.0427(15) 0.0235(12) 0.0125(11) 0.0109(10) 0.0059(12) 
 
_geom_special_details 
; 
 All esds (except the esd in the dihedral angle between two l.s. planes) 
 are estimated using the full covariance matrix.  The cell esds are taken 
 into account individually in the estimation of esds in distances, angles 
 and torsion angles; correlations between esds in cell parameters are only 
 used when they are defined by crystal symmetry.  An approximate (isotropic) 
 treatment of cell esds is used for estimating esds involving l.s. planes. 
; 
 
loop_ 
 _geom_bond_atom_site_label_1 
 _geom_bond_atom_site_label_2 
 _geom_bond_distance 
 _geom_bond_site_symmetry_2 
 _geom_bond_publ_flag 
Mo1 C18 1.964(2) . ? 
Mo1 C17 1.979(2) . ? 
Mo1 C9 2.269(2) . ? 
Mo1 C1 2.291(2) . ? 
Mo1 C2 2.314(2) . ? 
Mo1 C5 2.324(2) . ? 
Mo1 C8 2.386(2) . ? 
Mo1 C10 2.392(2) . ? 
Mo1 C3 2.407(2) . ? 
Mo1 C4 2.412(2) . ? 
O1 C6 1.205(3) . ? 
C5 C4 1.415(3) . ? 
C5 C1 1.418(3) . ? 
C5 H5 0.9300 . ? 
C15 C16 1.382(3) . ? 
C15 C14 1.394(3) . ? 
C15 H15 0.9300 . ? 
C11 C12 1.388(3) . ? 
C11 C16 1.417(3) . ? 
C11 C10 1.469(3) . ? 
C8 C9 1.411(3) . ? 
C8 C16 1.465(3) . ? 
C8 H8 0.9300 . ? 
C3 C4 1.405(3) . ? 
C3 C2 1.414(3) . ? 
C3 H3 0.9300 . ? 
O2 C6 1.335(3) . ? 
O2 C7 1.449(3) . ? 
O3 C17 1.141(3) . ? 
O4 C18 1.146(3) . ? 
C14 C13 1.383(4) . ? 
C14 H14 0.9301 . ? 
C4 H4 0.9301 . ? 
C9 C10 1.421(3) . ? 
C9 H9 0.9299 . ? 
C10 H10 0.9300 . ? 
C12 C13 1.395(3) . ? 
C12 H12 0.9300 . ? 
C13 H13 0.9301 . ? 
C6 C1 1.473(3) . ? 
C2 C1 1.430(3) . ? 
C2 H2 0.9300 . ? 
C7 H7A 0.9600 . ? 
C7 H7B 0.9600 . ? 
C7 H7C 0.9600 . ? 
 
loop_ 
 _geom_angle_atom_site_label_1 
 _geom_angle_atom_site_label_2 
 _geom_angle_atom_site_label_3 
 _geom_angle 
 _geom_angle_site_symmetry_1 
 _geom_angle_site_symmetry_3 
 _geom_angle_publ_flag 
C18 Mo1 C17 78.21(9) . . ? 
C18 Mo1 C9 84.29(9) . . ? 
C17 Mo1 C9 87.52(9) . . ? 
C18 Mo1 C1 95.24(8) . . ? 
C17 Mo1 C1 94.84(9) . . ? 
C9 Mo1 C1 177.45(8) . . ? 
C18 Mo1 C2 128.77(9) . . ? 
C17 Mo1 C2 88.90(9) . . ? 
C9 Mo1 C2 145.06(8) . . ? 
C1 Mo1 C2 36.18(8) . . ? 
C18 Mo1 C5 91.31(8) . . ? 
C17 Mo1 C5 128.83(8) . . ? 
C9 Mo1 C5 141.69(8) . . ? 
C1 Mo1 C5 35.77(8) . . ? 
C2 Mo1 C5 59.40(8) . . ? 
C18 Mo1 C8 116.61(8) . . ? 
C17 Mo1 C8 81.62(8) . . ? 
C9 Mo1 C8 35.19(8) . . ? 
C1 Mo1 C8 146.14(8) . . ? 
C2 Mo1 C8 109.97(8) . . ? 
C5 Mo1 C8 143.89(8) . . ? 
C18 Mo1 C10 86.22(8) . . ? 
C17 Mo1 C10 122.30(9) . . ? 
C9 Mo1 C10 35.39(8) . . ? 
C1 Mo1 C10 142.11(8) . . ? 
C2 Mo1 C10 139.23(8) . . ? 
C5 Mo1 C10 106.45(7) . . ? 
C8 Mo1 C10 56.92(8) . . ? 
C18 Mo1 C3 148.99(8) . . ? 
C17 Mo1 C3 117.11(9) . . ? 
C9 Mo1 C3 121.18(8) . . ? 
C1 Mo1 C3 58.47(8) . . ? 
C2 Mo1 C3 34.80(8) . . ? 
C5 Mo1 C3 57.85(8) . . ? 
C8 Mo1 C3 93.10(8) . . ? 
C10 Mo1 C3 104.46(7) . . ? 
C18 Mo1 C4 120.08(8) . . ? 
C17 Mo1 C4 146.66(9) . . ? 
C9 Mo1 C4 119.92(8) . . ? 
C1 Mo1 C4 58.20(7) . . ? 
C2 Mo1 C4 57.78(8) . . ? 
C5 Mo1 C4 34.71(8) . . ? 
C8 Mo1 C4 109.28(8) . . ? 
C10 Mo1 C4 88.41(7) . . ? 
C3 Mo1 C4 33.91(8) . . ? 
C4 C5 C1 107.9(2) . . ? 
C4 C5 Mo1 76.05(12) . . ? 
C1 C5 Mo1 70.84(12) . . ? 
C4 C5 H5 126.1 . . ? 
C1 C5 H5 126.1 . . ? 
Mo1 C5 H5 118.9 . . ? 
C16 C15 C14 118.6(2) . . ? 
C16 C15 H15 120.8 . . ? 
C14 C15 H15 120.6 . . ? 
C12 C11 C16 120.1(2) . . ? 
C12 C11 C10 132.9(2) . . ? 
C16 C11 C10 107.03(18) . . ? 
C9 C8 C16 107.70(19) . . ? 
C9 C8 Mo1 67.89(12) . . ? 
C16 C8 Mo1 97.94(13) . . ? 
C9 C8 H8 126.2 . . ? 
C16 C8 H8 126.1 . . ? 
Mo1 C8 H8 101.8 . . ? 
C4 C3 C2 108.3(2) . . ? 
C4 C3 Mo1 73.25(12) . . ? 
C2 C3 Mo1 69.00(12) . . ? 
C4 C3 H3 126.0 . . ? 
C2 C3 H3 125.8 . . ? 
Mo1 C3 H3 123.6 . . ? 
C6 O2 C7 115.48(19) . . ? 
C15 C16 C11 120.9(2) . . ? 
C15 C16 C8 132.1(2) . . ? 
C11 C16 C8 107.06(19) . . ? 
O3 C17 Mo1 176.6(2) . . ? 
O4 C18 Mo1 176.5(2) . . ? 
C13 C14 C15 120.6(2) . . ? 
C13 C14 H14 119.8 . . ? 
C15 C14 H14 119.6 . . ? 
C3 C4 C5 108.52(19) . . ? 
C3 C4 Mo1 72.84(12) . . ? 
C5 C4 Mo1 69.24(12) . . ? 
C3 C4 H4 125.8 . . ? 
C5 C4 H4 125.7 . . ? 
Mo1 C4 H4 123.7 . . ? 
C8 C9 C10 106.97(19) . . ? 
C8 C9 Mo1 76.92(12) . . ? 
C10 C9 Mo1 77.02(12) . . ? 
C8 C9 H9 126.5 . . ? 
C10 C9 H9 126.5 . . ? 
Mo1 C9 H9 112.1 . . ? 
C9 C10 C11 107.21(19) . . ? 
C9 C10 Mo1 67.59(12) . . ? 
C11 C10 Mo1 97.87(13) . . ? 
C9 C10 H10 126.5 . . ? 
C11 C10 H10 126.3 . . ? 
Mo1 C10 H10 102.1 . . ? 
C11 C12 C13 118.3(2) . . ? 
C11 C12 H12 120.8 . . ? 
C13 C12 H12 120.9 . . ? 
C14 C13 C12 121.5(2) . . ? 
C14 C13 H13 119.2 . . ? 
C12 C13 H13 119.3 . . ? 
O1 C6 O2 124.5(2) . . ? 
O1 C6 C1 123.7(2) . . ? 
O2 C6 C1 111.86(19) . . ? 
C3 C2 C1 107.7(2) . . ? 
C3 C2 Mo1 76.21(12) . . ? 
C1 C2 Mo1 71.05(12) . . ? 
C3 C2 H2 126.1 . . ? 
C1 C2 H2 126.2 . . ? 
Mo1 C2 H2 118.4 . . ? 
C5 C1 C2 107.60(19) . . ? 
C5 C1 C6 127.8(2) . . ? 
C2 C1 C6 124.5(2) . . ? 
C5 C1 Mo1 73.39(12) . . ? 
C2 C1 Mo1 72.77(12) . . ? 
C6 C1 Mo1 122.50(15) . . ? 
O2 C7 H7A 109.6 . . ? 
O2 C7 H7B 109.4 . . ? 
H7A C7 H7B 109.5 . . ? 
O2 C7 H7C 109.4 . . ? 
H7A C7 H7C 109.5 . . ? 
H7B C7 H7C 109.5 . . ? 
 
_diffrn_measured_fraction_theta_max    0.983 
_diffrn_reflns_theta_full              27.50 
_diffrn_measured_fraction_theta_full   0.983 
_refine_diff_density_max    0.409 
_refine_diff_density_min   -0.618 
_refine_diff_density_rms    0.082 

#===END

data_15


_audit_creation_method            SHELXL-97 
_chemical_name_systematic 
; 
 ? 
; 
_chemical_name_common             ? 
_chemical_melting_point           ? 
_chemical_formula_moiety          'C20 H16 Mo O6' 
_chemical_formula_sum 
 'C20 H16 Mo O6' 
_chemical_formula_weight          448.27 
 
loop_ 
 _atom_type_symbol 
 _atom_type_description 
 _atom_type_scat_dispersion_real 
 _atom_type_scat_dispersion_imag 
 _atom_type_scat_source 
 'C'  'C'   0.0033   0.0016 
 'International Tables Vol C Tables 4.2.6.8 and 6.1.1.4' 
 'H'  'H'   0.0000   0.0000 
 'International Tables Vol C Tables 4.2.6.8 and 6.1.1.4' 
 'O'  'O'   0.0106   0.0060 
 'International Tables Vol C Tables 4.2.6.8 and 6.1.1.4' 
 'Mo'  'Mo'  -1.6832   0.6857 
 'International Tables Vol C Tables 4.2.6.8 and 6.1.1.4' 
 
_symmetry_cell_setting            'orthorhombic' 
_symmetry_space_group_name_H-M    'P c a 21' 
_symmetry_space_group_name_Hall   'P 2c -2ac' 
 
loop_ 
 _symmetry_equiv_pos_as_xyz 
 'x, y, z' 
 '-x, -y, z+1/2' 
 '-x+1/2, y, z+1/2' 
 'x+1/2, -y, z' 
 
_cell_length_a                    13.4278(4) 
_cell_length_b                    9.6691(6) 
_cell_length_c                    13.9010(5) 
_cell_angle_alpha                 90 
_cell_angle_beta                  90 
_cell_angle_gamma                 90 
_cell_volume                      1804.83(14) 
_cell_formula_units_Z             4 
_cell_measurement_temperature     150(1) 
_cell_measurement_reflns_used     15222 
_cell_measurement_theta_min       1 
_cell_measurement_theta_max       27.5 
 
_exptl_crystal_description        'block' 
_exptl_crystal_colour             'red' 
_exptl_crystal_size_max           0.28 
_exptl_crystal_size_mid           0.23 
_exptl_crystal_size_min           0.16 
_exptl_crystal_density_meas       ? 
_exptl_crystal_density_diffrn     1.650 
_exptl_crystal_density_method     'not measured' 
_exptl_crystal_F_000              904 
_exptl_absorpt_coefficient_mu     0.761 
# Absorption correction 

loop_
_exptl_crystal_face_index_h 
_exptl_crystal_face_index_k 
_exptl_crystal_face_index_l 
_exptl_crystal_face_perp_dist 
    0    0   -1  0.024
    0    0    1  0.081
   -1    0    0  0.028
    1    0    0  0.123
    0    1    0  0.118
    0   -1    0  0.116
    1    1    0  0.104
    1   -1    0  0.110


_exptl_absorpt_correction_type 'integration' 
_exptl_absorpt_correction_T_min  0.869
_exptl_absorpt_correction_T_max  0.928
_exptl_absorpt_process_details
;
Gaussian integration (Coppens, 1970)
; 
 
_diffrn_ambient_temperature       150(1) 
_diffrn_radiation_wavelength      0.71073 
_diffrn_radiation_type            MoK\a 
_diffrn_radiation_source          'fine-focus sealed tube' 
_diffrn_radiation_monochromator   graphite 
_diffrn_measurement_device_type   'Bruker Nonius KappaCCD area detector' 
_diffrn_measurement_method        '\f and \w scans to fill the Ewald sphere'  
_diffrn_detector_area_resol_mean  9.091
_diffrn_standards_number          0
_diffrn_standards_interval_count  ? 
_diffrn_standards_interval_time   ? 
_diffrn_standards_decay_%         ? 
_diffrn_reflns_number             15186 
_diffrn_reflns_av_R_equivalents   0.0412 
_diffrn_reflns_av_sigmaI/netI     0.0328 
_diffrn_reflns_limit_h_min        -16 
_diffrn_reflns_limit_h_max        17 
_diffrn_reflns_limit_k_min        -12 
_diffrn_reflns_limit_k_max        12 
_diffrn_reflns_limit_l_min        -16 
_diffrn_reflns_limit_l_max        18 
_diffrn_reflns_theta_min          2.60 
_diffrn_reflns_theta_max          27.50 
_reflns_number_total              3926 
_reflns_number_gt                 3447 
_reflns_threshold_expression      >2sigma(I) 
 
_computing_data_collection        
'COLLECT (Hooft, 1998) and DENZO (Otwinowski & Minor, 1997)'
_computing_cell_refinement        'COLLECT and DENZO' 
_computing_data_reduction         'COLLECT and DENZO' 
_computing_structure_solution     'SIR92 (Altomare et al., 1994)' 
_computing_structure_refinement   'SHELXL-97 (Sheldrick, 1997)' 
_computing_molecular_graphics     'PLATON (Spek, 2003)'
_computing_publication_material   'SHELXL-97 (Sheldrick, 2008)' 
 
_refine_special_details 
; 
 Refinement of F^2^ against ALL reflections.  The weighted R-factor wR and 
 goodness of fit S are based on F^2^, conventional R-factors R are based 
 on F, with F set to zero for negative F^2^. The threshold expression of 
 F^2^ > 2sigma(F^2^) is used only for calculating R-factors(gt) etc. and is 
 not relevant to the choice of reflections for refinement.  R-factors based 
 on F^2^ are statistically about twice as large as those based on F, and R- 
 factors based on ALL data will be even larger. 
; 
 
_refine_ls_structure_factor_coef  Fsqd  
_refine_ls_matrix_type            full 
_refine_ls_weighting_scheme       calc  
_refine_ls_weighting_details 
 'calc w=1/[\s^2^(Fo^2^)+(0.0224P)^2^+1.8154P] where P=(Fo^2^+2Fc^2^)/3' 
_atom_sites_solution_primary      direct 
_atom_sites_solution_secondary    difmap 
_atom_sites_solution_hydrogens    geom 
_refine_ls_hydrogen_treatment     constr 
_refine_ls_extinction_method      none 
_refine_ls_extinction_coef        ? 
_refine_ls_abs_structure_details 
 'Flack H D (1983), Acta Cryst. A39, 876-881' 
_refine_ls_abs_structure_Flack    -0.03(4) 
_refine_ls_number_reflns          3926 
_refine_ls_number_parameters      244 
_refine_ls_number_restraints      1 
_refine_ls_R_factor_all           0.0420 
_refine_ls_R_factor_gt            0.0312 
_refine_ls_wR_factor_ref          0.0678 
_refine_ls_wR_factor_gt           0.0627 
_refine_ls_goodness_of_fit_ref    1.137 
_refine_ls_restrained_S_all       1.137 
_refine_ls_shift/su_max           0.002 
_refine_ls_shift/su_mean          0.000 
 
loop_ 
 _atom_site_label 
 _atom_site_type_symbol 
 _atom_site_fract_x 
 _atom_site_fract_y 
 _atom_site_fract_z 
 _atom_site_U_iso_or_equiv 
 _atom_site_adp_type 
 _atom_site_occupancy 
 _atom_site_symmetry_multiplicity 
 _atom_site_calc_flag 
 _atom_site_refinement_flags 
 _atom_site_disorder_assembly 
 _atom_site_disorder_group 
Mo1 Mo 0.846191(17) 0.89415(2) 0.66734(3) 0.01829(7) Uani 1 1 d . . . 
O4 O 1.0017(2) 0.6613(3) 0.8430(2) 0.0410(7) Uani 1 1 d . . . 
C12 C 0.7364(4) 0.8495(6) 0.5375(3) 0.0276(11) Uani 1 1 d . . . 
H12 H 0.7036 0.9340 0.5327 0.033 Uiso 1 1 d R . . 
O6 O 1.0714(2) 0.9401(4) 0.6239(3) 0.0517(9) Uani 1 1 d . . . 
C18 C 0.7742(3) 0.6291(4) 0.5890(3) 0.0301(9) Uani 1 1 d . . . 
C5 C 0.7464(3) 0.9684(4) 0.7947(2) 0.0240(8) Uani 1 1 d . . . 
H5 H 0.7035 1.0428 0.7858 0.029 Uiso 1 1 d R . . 
C11 C 0.8371(3) 0.8239(5) 0.5119(3) 0.0273(9) Uani 1 1 d . . . 
H11 H 0.8763 0.8765 0.4706 0.033 Uiso 1 1 d R . . 
C13 C 0.6934(3) 0.7205(4) 0.5734(3) 0.0310(9) Uani 1 1 d . . . 
O3 O 1.0407(3) 0.8680(4) 0.9079(3) 0.0607(11) Uani 1 1 d . . . 
C8 C 0.9854(3) 0.7937(5) 0.8607(3) 0.0327(9) Uani 1 1 d . . . 
C2 C 0.8869(3) 0.8393(5) 0.8246(3) 0.0261(9) Uani 1 1 d . . . 
C19 C 0.8396(3) 1.0814(4) 0.6130(3) 0.0345(9) Uani 1 1 d . . . 
C10 C 0.8654(3) 0.7031(4) 0.5619(3) 0.0285(8) Uani 1 1 d . . . 
H10 H 0.9303 0.6751 0.5749 0.034 Uiso 1 1 d R . . 
C3 C 0.8063(3) 0.7476(4) 0.8024(3) 0.0259(8) Uani 1 1 d . . . 
H3 H 0.8101 0.6516 0.8007 0.031 Uiso 1 1 d R . . 
C17 C 0.7584(4) 0.4968(4) 0.6236(3) 0.0468(12) Uani 1 1 d . . . 
H17 H 0.8112 0.4361 0.6333 0.056 Uiso 1 1 d R . . 
C14 C 0.5969(3) 0.6787(6) 0.5943(3) 0.0437(12) Uani 1 1 d . . . 
H14 H 0.5431 0.7376 0.5845 0.052 Uiso 1 1 d R . . 
C20 C 0.9878(3) 0.9236(4) 0.6380(3) 0.0315(10) Uani 1 1 d . . . 
C15 C 0.5827(4) 0.5454(6) 0.6305(4) 0.0598(15) Uani 1 1 d . . . 
H15 H 0.5187 0.5160 0.6458 0.072 Uiso 1 1 d R . . 
C4 C 0.7209(3) 0.8267(5) 0.7833(3) 0.0240(10) Uani 1 1 d . . . 
H4 H 0.6586 0.7925 0.7663 0.029 Uiso 1 1 d R . . 
C9 C 1.0921(4) 0.6051(5) 0.8855(4) 0.0485(12) Uani 1 1 d . . . 
H9A H 1.0861 0.6026 0.9543 0.058 Uiso 1 1 d R . . 
H9B H 1.1021 0.5129 0.8616 0.058 Uiso 1 1 d R . . 
H9C H 1.1478 0.6619 0.8679 0.058 Uiso 1 1 d R . . 
C16 C 0.6604(5) 0.4569(5) 0.6438(4) 0.0619(17) Uani 1 1 d . . . 
H16 H 0.6480 0.3681 0.6666 0.074 Uiso 1 1 d R . . 
O2 O 0.8377(2) 1.2080(3) 0.8650(3) 0.0546(10) Uani 1 1 d . . . 
O1 O 0.9902(2) 1.1319(3) 0.8338(3) 0.0493(9) Uani 1 1 d . . . 
C1 C 0.8491(3) 0.9783(4) 0.8220(3) 0.0251(8) Uani 1 1 d . . . 
C6 C 0.9016(3) 1.1103(5) 0.8421(3) 0.0326(9) Uani 1 1 d . . . 
O5 O 0.8359(3) 1.1933(3) 0.5854(3) 0.0595(11) Uani 1 1 d . . . 
C7 C 0.8800(4) 1.3428(5) 0.8828(5) 0.0665(18) Uani 1 1 d . . . 
H7A H 0.9220 1.3684 0.8297 0.080 Uiso 1 1 d R . . 
H7B H 0.8272 1.4090 0.8892 0.080 Uiso 1 1 d R . . 
H7C H 0.9187 1.3411 0.9408 0.080 Uiso 1 1 d R . . 
 
loop_ 
 _atom_site_aniso_label 
 _atom_site_aniso_U_11 
 _atom_site_aniso_U_22 
 _atom_site_aniso_U_33 
 _atom_site_aniso_U_23 
 _atom_site_aniso_U_13 
 _atom_site_aniso_U_12 
Mo1 0.01644(11) 0.02372(12) 0.01472(11) 0.0016(2) 0.0005(2) 0.00003(11) 
O4 0.0333(15) 0.0458(19) 0.0440(18) -0.0073(15) -0.0139(13) 0.0138(14) 
C12 0.025(2) 0.036(3) 0.021(2) -0.0048(18) -0.0019(16) 0.005(2) 
O6 0.0225(15) 0.070(2) 0.062(2) 0.0091(17) 0.0101(14) -0.0124(15) 
C18 0.035(2) 0.026(2) 0.029(2) -0.0108(16) 0.0008(17) -0.0019(17) 
C5 0.0188(17) 0.038(2) 0.0153(17) -0.0032(15) 0.0023(14) -0.0005(16) 
C11 0.034(2) 0.032(2) 0.0150(18) -0.0032(17) 0.0012(17) 0.003(2) 
C13 0.0271(19) 0.041(2) 0.025(2) -0.0141(18) -0.0018(15) -0.0028(18) 
O3 0.050(2) 0.049(2) 0.083(3) 0.0098(19) -0.045(2) -0.0035(17) 
C8 0.027(2) 0.041(2) 0.030(2) 0.0127(19) -0.0057(17) -0.0022(18) 
C2 0.026(2) 0.037(2) 0.0149(18) 0.0040(16) -0.0003(17) -0.004(2) 
C19 0.042(2) 0.035(2) 0.027(2) -0.0011(17) 0.0081(18) 0.004(2) 
C10 0.026(2) 0.031(2) 0.028(2) -0.0106(17) -0.0009(16) 0.0069(17) 
C3 0.031(2) 0.032(2) 0.0141(18) 0.0048(16) 0.0026(15) -0.0052(19) 
C17 0.065(3) 0.026(2) 0.050(3) -0.011(2) 0.004(2) -0.006(2) 
C14 0.026(2) 0.064(3) 0.041(3) -0.022(2) -0.0016(19) -0.009(2) 
C20 0.032(2) 0.034(2) 0.028(2) 0.0030(15) 0.0003(14) -0.0043(16) 
C15 0.051(3) 0.072(4) 0.056(3) -0.028(3) 0.014(2) -0.034(3) 
C4 0.0162(18) 0.042(3) 0.0137(19) 0.0014(18) 0.0025(14) -0.0044(19) 
C9 0.039(2) 0.057(3) 0.049(3) 0.008(3) -0.012(2) 0.018(2) 
C16 0.090(4) 0.043(2) 0.053(4) -0.014(2) 0.017(3) -0.032(3) 
O2 0.0345(17) 0.0388(18) 0.091(3) -0.0217(18) -0.0094(18) 0.0016(15) 
O1 0.0342(17) 0.049(2) 0.065(2) -0.0088(18) -0.0007(16) -0.0061(15) 
C1 0.0199(17) 0.037(2) 0.0186(16) -0.0034(15) 0.0007(14) -0.0019(17) 
C6 0.027(2) 0.045(2) 0.026(2) -0.0071(18) -0.0037(16) -0.0025(19) 
O5 0.087(3) 0.0252(16) 0.066(2) 0.0128(16) 0.028(2) 0.0123(18) 
C7 0.052(3) 0.040(3) 0.107(5) -0.023(3) -0.024(3) -0.005(3) 
 
_geom_special_details 
; 
 All esds (except the esd in the dihedral angle between two l.s. planes) 
 are estimated using the full covariance matrix.  The cell esds are taken 
 into account individually in the estimation of esds in distances, angles 
 and torsion angles; correlations between esds in cell parameters are only 
 used when they are defined by crystal symmetry.  An approximate (isotropic) 
 treatment of cell esds is used for estimating esds involving l.s. planes. 
; 
 
loop_ 
 _geom_bond_atom_site_label_1 
 _geom_bond_atom_site_label_2 
 _geom_bond_distance 
 _geom_bond_site_symmetry_2 
 _geom_bond_publ_flag 
Mo1 C19 1.964(4) . ? 
Mo1 C20 1.965(4) . ? 
Mo1 C11 2.268(4) . ? 
Mo1 C1 2.299(4) . ? 
Mo1 C2 2.315(4) . ? 
Mo1 C5 2.334(3) . ? 
Mo1 C12 2.370(5) . ? 
Mo1 C10 2.373(4) . ? 
Mo1 C3 2.412(4) . ? 
Mo1 C4 2.419(4) . ? 
O4 C8 1.322(5) . ? 
O4 C9 1.456(5) . ? 
C12 C11 1.421(7) . ? 
C12 C13 1.462(6) . ? 
C12 H12 0.9300 . ? 
O6 C20 1.151(5) . ? 
C18 C17 1.383(6) . ? 
C18 C13 1.417(6) . ? 
C18 C10 1.467(6) . ? 
C5 C4 1.421(6) . ? 
C5 C1 1.434(5) . ? 
C5 H5 0.9300 . ? 
C11 C10 1.411(6) . ? 
C11 H11 0.9300 . ? 
C13 C14 1.389(6) . ? 
O3 C8 1.224(5) . ? 
C8 C2 1.482(6) . ? 
C2 C3 1.433(6) . ? 
C2 C1 1.437(6) . ? 
C19 O5 1.148(5) . ? 
C10 H10 0.9300 . ? 
C3 C4 1.404(6) . ? 
C3 H3 0.9300 . ? 
C17 C16 1.400(7) . ? 
C17 H17 0.9300 . ? 
C14 C15 1.397(8) . ? 
C14 H14 0.9300 . ? 
C15 C16 1.362(8) . ? 
C15 H15 0.9300 . ? 
C4 H4 0.9300 . ? 
C9 H9A 0.9601 . ? 
C9 H9B 0.9600 . ? 
C9 H9C 0.9601 . ? 
C16 H16 0.9300 . ? 
O2 C6 1.315(5) . ? 
O2 C7 1.443(6) . ? 
O1 C6 1.214(5) . ? 
C1 C6 1.484(6) . ? 
C7 H7A 0.9600 . ? 
C7 H7B 0.9599 . ? 
C7 H7C 0.9601 . ? 
 
loop_ 
 _geom_angle_atom_site_label_1 
 _geom_angle_atom_site_label_2 
 _geom_angle_atom_site_label_3 
 _geom_angle 
 _geom_angle_site_symmetry_1 
 _geom_angle_site_symmetry_3 
 _geom_angle_publ_flag 
C19 Mo1 C20 80.21(17) . . ? 
C19 Mo1 C11 84.68(17) . . ? 
C20 Mo1 C11 84.14(16) . . ? 
C19 Mo1 C1 91.95(16) . . ? 
C20 Mo1 C1 97.23(15) . . ? 
C11 Mo1 C1 176.11(16) . . ? 
C19 Mo1 C2 125.80(17) . . ? 
C20 Mo1 C2 90.03(15) . . ? 
C11 Mo1 C2 147.53(14) . . ? 
C1 Mo1 C2 36.30(15) . . ? 
C19 Mo1 C5 88.97(16) . . ? 
C20 Mo1 C5 131.92(14) . . ? 
C11 Mo1 C5 141.63(14) . . ? 
C1 Mo1 C5 36.05(12) . . ? 
C2 Mo1 C5 59.32(14) . . ? 
C19 Mo1 C12 81.21(18) . . ? 
C20 Mo1 C12 118.08(16) . . ? 
C11 Mo1 C12 35.59(16) . . ? 
C1 Mo1 C12 141.91(15) . . ? 
C2 Mo1 C12 145.51(16) . . ? 
C5 Mo1 C12 106.03(14) . . ? 
C19 Mo1 C10 119.03(16) . . ? 
C20 Mo1 C10 83.10(15) . . ? 
C11 Mo1 C10 35.32(15) . . ? 
C1 Mo1 C10 148.38(14) . . ? 
C2 Mo1 C10 112.29(15) . . ? 
C5 Mo1 C10 140.43(14) . . ? 
C12 Mo1 C10 57.01(16) . . ? 
C19 Mo1 C3 146.19(16) . . ? 
C20 Mo1 C3 117.47(15) . . ? 
C11 Mo1 C3 123.61(18) . . ? 
C1 Mo1 C3 58.93(14) . . ? 
C2 Mo1 C3 35.20(14) . . ? 
C5 Mo1 C3 57.52(14) . . ? 
C12 Mo1 C3 110.33(15) . . ? 
C10 Mo1 C3 92.73(15) . . ? 
C19 Mo1 C4 118.25(17) . . ? 
C20 Mo1 C4 148.21(15) . . ? 
C11 Mo1 C4 121.11(16) . . ? 
C1 Mo1 C4 58.96(15) . . ? 
C2 Mo1 C4 58.22(14) . . ? 
C5 Mo1 C4 34.74(15) . . ? 
C12 Mo1 C4 91.46(14) . . ? 
C10 Mo1 C4 106.10(16) . . ? 
C3 Mo1 C4 33.79(14) . . ? 
C8 O4 C9 115.1(4) . . ? 
C11 C12 C13 108.2(4) . . ? 
C11 C12 Mo1 68.3(2) . . ? 
C13 C12 Mo1 98.1(3) . . ? 
C11 C12 H12 125.8 . . ? 
C13 C12 H12 126.0 . . ? 
Mo1 C12 H12 100.9 . . ? 
C17 C18 C13 120.9(4) . . ? 
C17 C18 C10 132.0(4) . . ? 
C13 C18 C10 107.2(3) . . ? 
C4 C5 C1 109.0(4) . . ? 
C4 C5 Mo1 75.9(2) . . ? 
C1 C5 Mo1 70.7(2) . . ? 
C4 C5 H5 125.6 . . ? 
C1 C5 H5 125.5 . . ? 
Mo1 C5 H5 119.5 . . ? 
C10 C11 C12 106.1(4) . . ? 
C10 C11 Mo1 76.4(2) . . ? 
C12 C11 Mo1 76.1(3) . . ? 
C10 C11 H11 127.1 . . ? 
C12 C11 H11 126.8 . . ? 
Mo1 C11 H11 113.2 . . ? 
C14 C13 C18 120.1(4) . . ? 
C14 C13 C12 133.5(4) . . ? 
C18 C13 C12 106.4(4) . . ? 
O3 C8 O4 124.6(4) . . ? 
O3 C8 C2 123.3(4) . . ? 
O4 C8 C2 111.9(4) . . ? 
C3 C2 C1 107.8(3) . . ? 
C3 C2 C8 124.3(4) . . ? 
C1 C2 C8 127.0(4) . . ? 
C3 C2 Mo1 76.1(2) . . ? 
C1 C2 Mo1 71.2(2) . . ? 
C8 C2 Mo1 126.8(3) . . ? 
O5 C19 Mo1 176.9(4) . . ? 
C11 C10 C18 107.8(4) . . ? 
C11 C10 Mo1 68.3(2) . . ? 
C18 C10 Mo1 97.5(2) . . ? 
C11 C10 H10 126.0 . . ? 
C18 C10 H10 126.1 . . ? 
Mo1 C10 H10 102.0 . . ? 
C4 C3 C2 108.7(4) . . ? 
C4 C3 Mo1 73.4(2) . . ? 
C2 C3 Mo1 68.7(2) . . ? 
C4 C3 H3 125.7 . . ? 
C2 C3 H3 125.6 . . ? 
Mo1 C3 H3 123.7 . . ? 
C18 C17 C16 118.0(5) . . ? 
C18 C17 H17 121.1 . . ? 
C16 C17 H17 120.9 . . ? 
C13 C14 C15 118.1(5) . . ? 
C13 C14 H14 121.0 . . ? 
C15 C14 H14 120.9 . . ? 
O6 C20 Mo1 177.8(4) . . ? 
C16 C15 C14 121.6(5) . . ? 
C16 C15 H15 119.0 . . ? 
C14 C15 H15 119.4 . . ? 
C3 C4 C5 107.9(4) . . ? 
C3 C4 Mo1 72.8(2) . . ? 
C5 C4 Mo1 69.3(2) . . ? 
C3 C4 H4 126.1 . . ? 
C5 C4 H4 126.0 . . ? 
Mo1 C4 H4 123.6 . . ? 
O4 C9 H9A 110.1 . . ? 
O4 C9 H9B 108.9 . . ? 
H9A C9 H9B 109.5 . . ? 
O4 C9 H9C 109.4 . . ? 
H9A C9 H9C 109.5 . . ? 
H9B C9 H9C 109.5 . . ? 
C15 C16 C17 121.3(5) . . ? 
C15 C16 H16 119.2 . . ? 
C17 C16 H16 119.5 . . ? 
C6 O2 C7 115.7(4) . . ? 
C5 C1 C2 106.5(3) . . ? 
C5 C1 C6 124.3(4) . . ? 
C2 C1 C6 129.2(3) . . ? 
C5 C1 Mo1 73.3(2) . . ? 
C2 C1 Mo1 72.5(2) . . ? 
C6 C1 Mo1 119.2(3) . . ? 
O1 C6 O2 122.5(4) . . ? 
O1 C6 C1 126.6(4) . . ? 
O2 C6 C1 110.8(3) . . ? 
O2 C7 H7A 109.4 . . ? 
O2 C7 H7B 109.1 . . ? 
H7A C7 H7B 109.5 . . ? 
O2 C7 H7C 110.0 . . ? 
H7A C7 H7C 109.5 . . ? 
H7B C7 H7C 109.5 . . ? 
 
_diffrn_measured_fraction_theta_max    0.998 
_diffrn_reflns_theta_full              27.50 
_diffrn_measured_fraction_theta_full   0.998 
_refine_diff_density_max    0.455 
_refine_diff_density_min   -0.403 
_refine_diff_density_rms    0.079 
#===END

 
data_18

_audit_creation_method            SHELXL-97 
_chemical_name_systematic 
; 
 ? 
; 
_chemical_name_common             ? 
_chemical_melting_point           ? 
_chemical_formula_moiety          'C17 H27 B9 Mo O2 S' 
_chemical_formula_sum 
 'C17 H27 B9 Mo O2 S' 
_chemical_formula_weight          488.68 
 
loop_ 
 _atom_type_symbol 
 _atom_type_description 
 _atom_type_scat_dispersion_real 
 _atom_type_scat_dispersion_imag 
 _atom_type_scat_source 
 'C'  'C'   0.0033   0.0016 
 'International Tables Vol C Tables 4.2.6.8 and 6.1.1.4' 
 'H'  'H'   0.0000   0.0000 
 'International Tables Vol C Tables 4.2.6.8 and 6.1.1.4' 
 'O'  'O'   0.0106   0.0060 
 'International Tables Vol C Tables 4.2.6.8 and 6.1.1.4' 
 'B'  'B'   0.0013   0.0007 
 'International Tables Vol C Tables 4.2.6.8 and 6.1.1.4' 
 'S'  'S'   0.1246   0.1234 
 'International Tables Vol C Tables 4.2.6.8 and 6.1.1.4' 
 'Mo'  'Mo'  -1.6832   0.6857 
 'International Tables Vol C Tables 4.2.6.8 and 6.1.1.4' 
 
_symmetry_cell_setting            'monoclinic' 
_symmetry_space_group_name_H-M    'P 21/c' 
_symmetry_space_group_name_Hall   '-P 2ybc' 
 
loop_ 
 _symmetry_equiv_pos_as_xyz 
 'x, y, z' 
 '-x, y+1/2, -z+1/2' 
 '-x, -y, -z' 
 'x, -y-1/2, z-1/2' 
 
_cell_length_a                    17.6009(10) 
_cell_length_b                    8.4810(3) 
_cell_length_c                    14.8301(9) 
_cell_angle_alpha                 90 
_cell_angle_beta                  95.912(5) 
_cell_angle_gamma                 90 
_cell_volume                      2202.0(2) 
_cell_formula_units_Z             4 
_cell_measurement_temperature     150(1) 
_cell_measurement_reflns_used     15410 
_cell_measurement_theta_min       1 
_cell_measurement_theta_max       27.5 
 
_exptl_crystal_description        'block' 
_exptl_crystal_colour             'black' 
_exptl_crystal_size_max           0.24 
_exptl_crystal_size_mid           0.23 
_exptl_crystal_size_min           0.13 
_exptl_crystal_density_meas       ? 
_exptl_crystal_density_diffrn     1.474 
_exptl_crystal_density_method     'not measured' 
_exptl_crystal_F_000              992 
_exptl_absorpt_coefficient_mu     0.703 
# Absorption correction 

loop_
_exptl_crystal_face_index_h 
_exptl_crystal_face_index_k 
_exptl_crystal_face_index_l 
_exptl_crystal_face_perp_dist 
    0    0    1  0.056
    0    0   -1  0.064
    0   -1    0  0.086
    0    1    0  0.117
   -1    0    0  0.081
    1    0    0  0.106
   -1    1    0  0.100
    1    1    0  0.119


_exptl_absorpt_correction_type 'integration' 
_exptl_absorpt_correction_T_min  0.873
_exptl_absorpt_correction_T_max  0.920
_exptl_absorpt_process_details
;
Gaussian integration (Coppens, 1970)
;
 
_diffrn_ambient_temperature       150(1) 
_diffrn_radiation_wavelength      0.71073 
_diffrn_radiation_type            MoK\a 
_diffrn_radiation_source          'fine-focus sealed tube' 
_diffrn_radiation_monochromator   graphite 
_diffrn_measurement_device_type   'Bruker Nonius KappaCCD area detector' 
_diffrn_measurement_method        '\f and \w scans to fill the Ewald sphere'  
_diffrn_detector_area_resol_mean  9.091
_diffrn_standards_number          0 
_diffrn_standards_interval_count  ? 
_diffrn_standards_interval_time   ? 
_diffrn_standards_decay_%         ? 
_diffrn_reflns_number             15362 
_diffrn_reflns_av_R_equivalents   0.0389 
_diffrn_reflns_av_sigmaI/netI     0.0367 
_diffrn_reflns_limit_h_min        -22 
_diffrn_reflns_limit_h_max        19 
_diffrn_reflns_limit_k_min        -9 
_diffrn_reflns_limit_k_max        11 
_diffrn_reflns_limit_l_min        -19 
_diffrn_reflns_limit_l_max        17 
_diffrn_reflns_theta_min          2.33 
_diffrn_reflns_theta_max          27.36 
_reflns_number_total              4884 
_reflns_number_gt                 4045 
_reflns_threshold_expression      >2sigma(I) 
 
_computing_data_collection        
'COLLECT (Hooft, 1998) and DENZO (Otwinowski & Minor, 1997)'
_computing_cell_refinement        'COLLECT and DENZO' 
_computing_data_reduction         'COLLECT and DENZO' 
_computing_structure_solution     'SIR92 (Altomare et al., 1994)' 
_computing_structure_refinement   'SHELXL-97 (Sheldrick, 1997)' 
_computing_molecular_graphics     'PLATON (Spek, 2003)'
_computing_publication_material   'SHELXL-97 (Sheldrick, 2008)' 
 
_refine_special_details 
; 
 Refinement of F^2^ against ALL reflections.  The weighted R-factor wR and 
 goodness of fit S are based on F^2^, conventional R-factors R are based 
 on F, with F set to zero for negative F^2^. The threshold expression of 
 F^2^ > 2sigma(F^2^) is used only for calculating R-factors(gt) etc. and is 
 not relevant to the choice of reflections for refinement.  R-factors based 
 on F^2^ are statistically about twice as large as those based on F, and R- 
 factors based on ALL data will be even larger. 
; 
 
_refine_ls_structure_factor_coef  Fsqd  
_refine_ls_matrix_type            full 
_refine_ls_weighting_scheme       calc  
_refine_ls_weighting_details 
 'calc w=1/[\s^2^(Fo^2^)+(0.0215P)^2^+2.9005P] where P=(Fo^2^+2Fc^2^)/3' 
_atom_sites_solution_primary      direct 
_atom_sites_solution_secondary    difmap 
_atom_sites_solution_hydrogens    geom 
_refine_ls_hydrogen_treatment     constr 
_refine_ls_extinction_method      none 
_refine_ls_extinction_coef        ? 
_refine_ls_number_reflns          4884 
_refine_ls_number_parameters      271 
_refine_ls_number_restraints      0 
_refine_ls_R_factor_all           0.0475 
_refine_ls_R_factor_gt            0.0323 
_refine_ls_wR_factor_ref          0.0751 
_refine_ls_wR_factor_gt           0.0666 
_refine_ls_goodness_of_fit_ref    1.113 
_refine_ls_restrained_S_all       1.113 
_refine_ls_shift/su_max           0.001 
_refine_ls_shift/su_mean          0.000 
 
loop_ 
 _atom_site_label 
 _atom_site_type_symbol 
 _atom_site_fract_x 
 _atom_site_fract_y 
 _atom_site_fract_z 
 _atom_site_U_iso_or_equiv 
 _atom_site_adp_type 
 _atom_site_occupancy 
 _atom_site_symmetry_multiplicity 
 _atom_site_calc_flag 
 _atom_site_refinement_flags 
 _atom_site_disorder_assembly 
 _atom_site_disorder_group 
Mo1 Mo 0.725160(12) 0.07292(3) 0.883233(14) 0.01666(7) Uani 1 1 d . . . 
S1 S 0.83926(4) -0.24552(8) 0.95352(4) 0.02137(15) Uani 1 1 d . . . 
O2 O 0.73792(13) -0.0033(3) 1.08921(13) 0.0351(5) Uani 1 1 d . . . 
O1 O 0.71125(13) 0.3993(3) 0.97564(15) 0.0376(5) Uani 1 1 d . . . 
C25 C 0.71490(16) 0.2790(4) 0.94096(19) 0.0263(6) Uani 1 1 d . . . 
C7 C 0.76225(14) 0.0846(3) 0.72978(17) 0.0201(5) Uani 1 1 d . . . 
H7 H 0.7073 0.1133 0.6910 0.024 Uiso 1 1 d R . . 
B2 B 0.81917(18) -0.0349(4) 0.6729(2) 0.0230(6) Uani 1 1 d . . . 
H2 H 0.8046 -0.0836 0.6045 0.028 Uiso 1 1 d R . . 
C8 C 0.77794(14) -0.0875(3) 0.76885(16) 0.0182(5) Uani 1 1 d . . . 
H8 H 0.7347 -0.1812 0.7584 0.022 Uiso 1 1 d R . . 
C15 C 0.60611(14) -0.1346(3) 0.78454(18) 0.0199(5) Uani 1 1 d . . . 
C26 C 0.73436(16) 0.0230(3) 1.01249(19) 0.0251(6) Uani 1 1 d . . . 
B9 B 0.83688(15) -0.0805(3) 0.86481(18) 0.0167(5) Uani 1 1 d . . . 
C17 C 0.59925(15) 0.0403(3) 0.90351(19) 0.0239(6) Uani 1 1 d . . . 
H17 H 0.5883 0.0768 0.9599 0.029 Uiso 1 1 d R . . 
C22 C 0.60648(15) -0.2685(3) 0.72992(19) 0.0229(6) Uani 1 1 d . . . 
B10 B 0.86148(16) 0.1195(3) 0.8873(2) 0.0195(6) Uani 1 1 d . . . 
H10 H 0.8795 0.1687 0.9547 0.023 Uiso 1 1 d R . . 
B4 B 0.92507(17) -0.0090(4) 0.8329(2) 0.0208(6) Uani 1 1 d . . . 
H4 H 0.9809 -0.0425 0.8677 0.025 Uiso 1 1 d R . . 
C20 C 0.57727(15) -0.0972(4) 0.59968(19) 0.0266(6) Uani 1 1 d . . . 
H20 H 0.5674 -0.0875 0.5371 0.032 Uiso 1 1 d R . . 
C14 C 0.59045(14) 0.0164(3) 0.74639(18) 0.0189(5) Uani 1 1 d . . . 
C13 C 0.90487(17) -0.1619(4) 1.04206(19) 0.0305(7) Uani 1 1 d . . . 
H13A H 0.9135 -0.2360 1.0910 0.037 Uiso 1 1 d R . . 
H13B H 0.8838 -0.0665 1.0639 0.037 Uiso 1 1 d R . . 
H13C H 0.9524 -0.1389 1.0183 0.037 Uiso 1 1 d R . . 
C19 C 0.57743(14) 0.0387(3) 0.65351(19) 0.0224(6) Uani 1 1 d . . . 
C18 C 0.59573(15) 0.1288(3) 0.82233(18) 0.0213(6) Uani 1 1 d . . . 
H18 H 0.5968 0.2381 0.8178 0.026 Uiso 1 1 d R . . 
C21 C 0.59111(15) -0.2457(3) 0.63694(19) 0.0262(6) Uani 1 1 d . . . 
H21 H 0.5900 -0.3328 0.5987 0.031 Uiso 1 1 d R . . 
B5 B 0.90668(18) 0.1829(4) 0.7904(2) 0.0243(7) Uani 1 1 d . . . 
H5 H 0.9502 0.2763 0.7976 0.029 Uiso 1 1 d R . . 
B11 B 0.80731(18) 0.2236(4) 0.7969(2) 0.0228(6) Uani 1 1 d . . . 
H11 H 0.7868 0.3450 0.8041 0.027 Uiso 1 1 d R . . 
B1 B 0.91320(17) 0.0216(4) 0.7138(2) 0.0221(6) Uani 1 1 d . . . 
H1 H 0.9609 0.0091 0.6719 0.027 Uiso 1 1 d R . . 
B3 B 0.87052(17) -0.1428(4) 0.7611(2) 0.0201(6) Uani 1 1 d . . . 
H3 H 0.8896 -0.2643 0.7505 0.024 Uiso 1 1 d R . . 
C16 C 0.62221(14) -0.1143(3) 0.88261(18) 0.0211(6) Uani 1 1 d . . . 
H16 H 0.6436 -0.1889 0.9236 0.025 Uiso 1 1 d R . . 
C23 C 0.56552(17) 0.2004(4) 0.6127(2) 0.0294(6) Uani 1 1 d . . . 
H23A H 0.5238 0.2515 0.6378 0.035 Uiso 1 1 d R . . 
H23B H 0.5540 0.1908 0.5482 0.035 Uiso 1 1 d R . . 
H23C H 0.6111 0.2618 0.6257 0.035 Uiso 1 1 d R . . 
C12 C 0.8979(2) -0.4050(4) 0.9202(2) 0.0369(7) Uani 1 1 d . . . 
H12A H 0.9438 -0.3633 0.8998 0.044 Uiso 1 1 d R . . 
H12B H 0.8703 -0.4636 0.8720 0.044 Uiso 1 1 d R . . 
H12C H 0.9107 -0.4732 0.9712 0.044 Uiso 1 1 d R . . 
C24 C 0.62321(18) -0.4289(3) 0.7700(2) 0.0336(7) Uani 1 1 d . . . 
H24A H 0.6653 -0.4222 0.8165 0.040 Uiso 1 1 d R . . 
H24B H 0.6360 -0.4999 0.7234 0.040 Uiso 1 1 d R . . 
H24C H 0.5789 -0.4673 0.7956 0.040 Uiso 1 1 d R . . 
B6 B 0.84122(18) 0.1666(4) 0.6921(2) 0.0254(7) Uani 1 1 d . . . 
H6 H 0.8413 0.2498 0.6352 0.030 Uiso 1 1 d R . . 
 
loop_ 
 _atom_site_aniso_label 
 _atom_site_aniso_U_11 
 _atom_site_aniso_U_22 
 _atom_site_aniso_U_33 
 _atom_site_aniso_U_23 
 _atom_site_aniso_U_13 
 _atom_site_aniso_U_12 
Mo1 0.01609(11) 0.01960(12) 0.01460(11) -0.00328(9) 0.00306(7) -0.00201(9) 
S1 0.0230(3) 0.0228(3) 0.0183(3) 0.0033(2) 0.0021(3) -0.0021(3) 
O2 0.0399(13) 0.0508(14) 0.0152(11) -0.0002(9) 0.0063(9) -0.0077(10) 
O1 0.0480(14) 0.0281(12) 0.0366(13) -0.0141(10) 0.0047(10) -0.0015(10) 
C25 0.0241(15) 0.0327(16) 0.0222(14) -0.0028(12) 0.0036(11) -0.0029(12) 
C7 0.0181(12) 0.0265(14) 0.0161(12) 0.0010(10) 0.0042(10) 0.0018(11) 
B2 0.0212(15) 0.0337(18) 0.0147(14) 0.0009(12) 0.0046(11) 0.0025(12) 
C8 0.0163(12) 0.0234(13) 0.0150(12) -0.0012(10) 0.0018(9) -0.0006(10) 
C15 0.0140(12) 0.0238(14) 0.0223(14) -0.0021(10) 0.0033(10) -0.0036(10) 
C26 0.0223(14) 0.0280(15) 0.0256(16) -0.0065(11) 0.0052(11) -0.0038(11) 
B9 0.0137(13) 0.0216(14) 0.0150(13) 0.0008(11) 0.0014(10) -0.0014(11) 
C17 0.0171(13) 0.0332(16) 0.0223(14) -0.0072(11) 0.0060(10) -0.0032(11) 
C22 0.0166(13) 0.0228(14) 0.0300(15) -0.0051(11) 0.0052(11) -0.0048(10) 
B10 0.0165(14) 0.0211(15) 0.0203(15) -0.0013(11) -0.0001(11) -0.0027(11) 
B4 0.0160(14) 0.0258(16) 0.0209(16) 0.0012(12) 0.0030(11) -0.0040(11) 
C20 0.0204(13) 0.0394(17) 0.0196(14) -0.0033(12) -0.0002(10) -0.0041(12) 
C14 0.0114(12) 0.0223(13) 0.0231(14) -0.0033(10) 0.0029(10) -0.0014(9) 
C13 0.0326(17) 0.0372(17) 0.0203(15) 0.0054(12) -0.0045(12) -0.0065(13) 
C19 0.0134(12) 0.0286(15) 0.0250(14) 0.0008(11) 0.0008(10) -0.0033(10) 
C18 0.0175(13) 0.0189(13) 0.0276(15) -0.0050(11) 0.0032(11) -0.0005(10) 
C21 0.0201(14) 0.0300(16) 0.0289(15) -0.0127(12) 0.0042(11) -0.0081(11) 
B5 0.0221(16) 0.0240(16) 0.0272(17) 0.0021(12) 0.0048(13) -0.0057(12) 
B11 0.0238(16) 0.0210(15) 0.0243(16) 0.0021(12) 0.0052(12) -0.0021(12) 
B1 0.0172(15) 0.0301(17) 0.0195(15) 0.0046(12) 0.0046(11) 0.0002(12) 
B3 0.0177(14) 0.0244(16) 0.0186(15) -0.0008(12) 0.0028(11) -0.0004(11) 
C16 0.0171(13) 0.0249(14) 0.0215(14) 0.0012(10) 0.0033(10) -0.0039(10) 
C23 0.0222(14) 0.0358(17) 0.0293(16) 0.0055(13) -0.0013(12) 0.0024(12) 
C12 0.0465(19) 0.0295(17) 0.0355(18) 0.0060(13) 0.0083(14) 0.0127(14) 
C24 0.0349(17) 0.0249(16) 0.0422(18) -0.0026(13) 0.0093(14) -0.0054(13) 
B6 0.0224(16) 0.0293(17) 0.0258(17) 0.0073(13) 0.0089(13) 0.0031(13) 
 
_geom_special_details 
; 
 All esds (except the esd in the dihedral angle between two l.s. planes) 
 are estimated using the full covariance matrix.  The cell esds are taken 
 into account individually in the estimation of esds in distances, angles 
 and torsion angles; correlations between esds in cell parameters are only 
 used when they are defined by crystal symmetry.  An approximate (isotropic) 
 treatment of cell esds is used for estimating esds involving l.s. planes. 
; 
 
loop_ 
 _geom_bond_atom_site_label_1 
 _geom_bond_atom_site_label_2 
 _geom_bond_distance 
 _geom_bond_site_symmetry_2 
 _geom_bond_publ_flag 
Mo1 C26 1.953(3) . ? 
Mo1 C25 1.963(3) . ? 
Mo1 C17 2.284(3) . ? 
Mo1 B11 2.397(3) . ? 
Mo1 B9 2.397(3) . ? 
Mo1 C16 2.409(3) . ? 
Mo1 C18 2.410(3) . ? 
Mo1 B10 2.426(3) . ? 
Mo1 C8 2.432(2) . ? 
Mo1 C7 2.433(2) . ? 
S1 C12 1.801(3) . ? 
S1 C13 1.802(3) . ? 
S1 B9 1.918(3) . ? 
O2 C26 1.155(3) . ? 
O1 C25 1.147(3) . ? 
C7 C8 1.584(4) . ? 
C7 B11 1.687(4) . ? 
C7 B6 1.699(4) . ? 
C7 B2 1.708(4) . ? 
C7 H7 1.0999 . ? 
B2 C8 1.722(4) . ? 
B2 B3 1.767(4) . ? 
B2 B1 1.769(4) . ? 
B2 B6 1.770(5) . ? 
B2 H2 1.1000 . ? 
C8 B9 1.673(4) . ? 
C8 B3 1.711(4) . ? 
C8 H8 1.1000 . ? 
C15 C22 1.395(4) . ? 
C15 C14 1.416(4) . ? 
C15 C16 1.463(4) . ? 
B9 B10 1.773(4) . ? 
B9 B4 1.776(4) . ? 
B9 B3 1.784(4) . ? 
C17 C18 1.415(4) . ? 
C17 C16 1.416(4) . ? 
C17 H17 0.9301 . ? 
C22 C21 1.391(4) . ? 
C22 C24 1.501(4) . ? 
B10 B11 1.795(4) . ? 
B10 B5 1.795(4) . ? 
B10 B4 1.810(4) . ? 
B10 H10 1.1000 . ? 
B4 B5 1.763(4) . ? 
B4 B3 1.770(4) . ? 
B4 B1 1.776(4) . ? 
B4 H4 1.1000 . ? 
C20 C21 1.386(4) . ? 
C20 C19 1.402(4) . ? 
C20 H20 0.9300 . ? 
C14 C19 1.386(4) . ? 
C14 C18 1.471(4) . ? 
C13 H13A 0.9599 . ? 
C13 H13B 0.9600 . ? 
C13 H13C 0.9600 . ? 
C19 C23 1.505(4) . ? 
C18 H18 0.9300 . ? 
C21 H21 0.9300 . ? 
B5 B6 1.767(5) . ? 
B5 B1 1.789(5) . ? 
B5 B11 1.795(4) . ? 
B5 H5 1.1000 . ? 
B11 B6 1.787(4) . ? 
B11 H11 1.1000 . ? 
B1 B3 1.764(4) . ? 
B1 B6 1.771(4) . ? 
B1 H1 1.0999 . ? 
B3 H3 1.1000 . ? 
C16 H16 0.9300 . ? 
C23 H23A 0.9600 . ? 
C23 H23B 0.9600 . ? 
C23 H23C 0.9601 . ? 
C12 H12A 0.9601 . ? 
C12 H12B 0.9601 . ? 
C12 H12C 0.9600 . ? 
C24 H24A 0.9601 . ? 
C24 H24B 0.9599 . ? 
C24 H24C 0.9600 . ? 
B6 H6 1.1000 . ? 
 
loop_ 
 _geom_angle_atom_site_label_1 
 _geom_angle_atom_site_label_2 
 _geom_angle_atom_site_label_3 
 _geom_angle 
 _geom_angle_site_symmetry_1 
 _geom_angle_site_symmetry_3 
 _geom_angle_publ_flag 
C26 Mo1 C25 76.52(12) . . ? 
C26 Mo1 C17 80.10(11) . . ? 
C25 Mo1 C17 85.20(11) . . ? 
C26 Mo1 B11 130.26(11) . . ? 
C25 Mo1 B11 81.14(11) . . ? 
C17 Mo1 B11 141.43(11) . . ? 
C26 Mo1 B9 90.47(11) . . ? 
C25 Mo1 B9 130.28(11) . . ? 
C17 Mo1 B9 140.17(10) . . ? 
B11 Mo1 B9 71.42(10) . . ? 
C26 Mo1 C16 81.21(10) . . ? 
C25 Mo1 C16 119.06(10) . . ? 
C17 Mo1 C16 34.99(9) . . ? 
B11 Mo1 C16 147.61(10) . . ? 
B9 Mo1 C16 105.52(9) . . ? 
C26 Mo1 C18 112.96(11) . . ? 
C25 Mo1 C18 82.09(10) . . ? 
C17 Mo1 C18 34.96(10) . . ? 
B11 Mo1 C18 107.09(10) . . ? 
B9 Mo1 C18 145.00(9) . . ? 
C16 Mo1 C18 56.38(9) . . ? 
C26 Mo1 B10 91.67(11) . . ? 
C25 Mo1 B10 88.82(11) . . ? 
C17 Mo1 B10 170.76(10) . . ? 
B11 Mo1 B10 43.70(10) . . ? 
B9 Mo1 B10 43.14(10) . . ? 
C16 Mo1 B10 148.11(10) . . ? 
C18 Mo1 B10 150.64(10) . . ? 
C26 Mo1 C8 124.34(10) . . ? 
C25 Mo1 C8 149.46(10) . . ? 
C17 Mo1 C8 118.01(9) . . ? 
B11 Mo1 C8 68.34(10) . . ? 
B9 Mo1 C8 40.54(9) . . ? 
C16 Mo1 C8 88.27(9) . . ? 
C18 Mo1 C8 105.24(9) . . ? 
B10 Mo1 C8 70.15(9) . . ? 
C26 Mo1 C7 157.44(10) . . ? 
C25 Mo1 C7 114.66(10) . . ? 
C17 Mo1 C7 119.05(9) . . ? 
B11 Mo1 C7 40.87(10) . . ? 
B9 Mo1 C7 67.24(9) . . ? 
C16 Mo1 C7 107.31(9) . . ? 
C18 Mo1 C7 88.61(9) . . ? 
B10 Mo1 C7 69.91(9) . . ? 
C8 Mo1 C7 38.00(9) . . ? 
C12 S1 C13 98.81(16) . . ? 
C12 S1 B9 109.42(14) . . ? 
C13 S1 B9 100.35(13) . . ? 
O1 C25 Mo1 177.9(3) . . ? 
C8 C7 B11 112.0(2) . . ? 
C8 C7 B6 112.3(2) . . ? 
B11 C7 B6 63.71(18) . . ? 
C8 C7 B2 62.92(17) . . ? 
B11 C7 B2 116.2(2) . . ? 
B6 C7 B2 62.58(18) . . ? 
C8 C7 Mo1 70.96(13) . . ? 
B11 C7 Mo1 68.40(13) . . ? 
B6 C7 Mo1 129.15(18) . . ? 
B2 C7 Mo1 131.71(17) . . ? 
C8 C7 H7 120.4 . . ? 
B11 C7 H7 119.2 . . ? 
B6 C7 H7 116.3 . . ? 
B2 C7 H7 113.7 . . ? 
Mo1 C7 H7 101.1 . . ? 
C7 B2 C8 55.02(15) . . ? 
C7 B2 B3 102.9(2) . . ? 
C8 B2 B3 58.72(16) . . ? 
C7 B2 B1 104.2(2) . . ? 
C8 B2 B1 104.2(2) . . ? 
B3 B2 B1 59.83(17) . . ? 
C7 B2 B6 58.47(17) . . ? 
C8 B2 B6 102.8(2) . . ? 
B3 B2 B6 107.1(2) . . ? 
B1 B2 B6 60.06(18) . . ? 
C7 B2 H2 125.8 . . ? 
C8 B2 H2 125.9 . . ? 
B3 B2 H2 122.8 . . ? 
B1 B2 H2 122.6 . . ? 
B6 B2 H2 122.5 . . ? 
C7 C8 B9 110.3(2) . . ? 
C7 C8 B3 111.1(2) . . ? 
B9 C8 B3 63.62(16) . . ? 
C7 C8 B2 62.05(17) . . ? 
B9 C8 B2 114.6(2) . . ? 
B3 C8 B2 61.97(16) . . ? 
C7 C8 Mo1 71.03(13) . . ? 
B9 C8 Mo1 68.59(13) . . ? 
B3 C8 Mo1 129.43(16) . . ? 
B2 C8 Mo1 130.95(17) . . ? 
C7 C8 H8 121.5 . . ? 
B9 C8 H8 120.3 . . ? 
B3 C8 H8 116.3 . . ? 
B2 C8 H8 114.5 . . ? 
Mo1 C8 H8 101.2 . . ? 
C22 C15 C14 121.1(2) . . ? 
C22 C15 C16 131.4(3) . . ? 
C14 C15 C16 107.5(2) . . ? 
O2 C26 Mo1 177.9(3) . . ? 
C8 B9 B10 108.2(2) . . ? 
C8 B9 B4 105.5(2) . . ? 
B10 B9 B4 61.35(17) . . ? 
C8 B9 B3 59.21(15) . . ? 
B10 B9 B3 110.4(2) . . ? 
B4 B9 B3 59.62(16) . . ? 
C8 B9 S1 121.67(18) . . ? 
B10 B9 S1 125.53(18) . . ? 
B4 B9 S1 118.30(18) . . ? 
B3 B9 S1 112.91(18) . . ? 
C8 B9 Mo1 70.87(13) . . ? 
B10 B9 Mo1 69.31(13) . . ? 
B4 B9 Mo1 126.52(18) . . ? 
B3 B9 Mo1 127.46(17) . . ? 
S1 B9 Mo1 106.14(12) . . ? 
C18 C17 C16 107.1(2) . . ? 
C18 C17 Mo1 77.39(15) . . ? 
C16 C17 Mo1 77.33(15) . . ? 
C18 C17 H17 126.4 . . ? 
C16 C17 H17 126.5 . . ? 
Mo1 C17 H17 111.8 . . ? 
C21 C22 C15 116.8(3) . . ? 
C21 C22 C24 121.9(3) . . ? 
C15 C22 C24 121.4(3) . . ? 
B9 B10 B11 103.3(2) . . ? 
B9 B10 B5 104.8(2) . . ? 
B11 B10 B5 59.99(17) . . ? 
B9 B10 B4 59.39(16) . . ? 
B11 B10 B4 105.6(2) . . ? 
B5 B10 B4 58.55(17) . . ? 
B9 B10 Mo1 67.55(13) . . ? 
B11 B10 Mo1 67.28(13) . . ? 
B5 B10 Mo1 123.20(18) . . ? 
B4 B10 Mo1 123.11(17) . . ? 
B9 B10 H10 125.2 . . ? 
B11 B10 H10 125.0 . . ? 
B5 B10 H10 120.2 . . ? 
B4 B10 H10 120.0 . . ? 
Mo1 B10 H10 106.0 . . ? 
B5 B4 B3 108.0(2) . . ? 
B5 B4 B1 60.73(18) . . ? 
B3 B4 B1 59.66(17) . . ? 
B5 B4 B9 106.1(2) . . ? 
B3 B4 B9 60.43(16) . . ? 
B1 B4 B9 107.4(2) . . ? 
B5 B4 B10 60.30(17) . . ? 
B3 B4 B10 109.4(2) . . ? 
B1 B4 B10 109.9(2) . . ? 
B9 B4 B10 59.27(16) . . ? 
B5 B4 H4 121.9 . . ? 
B3 B4 H4 121.3 . . ? 
B1 B4 H4 120.9 . . ? 
B9 B4 H4 123.4 . . ? 
B10 B4 H4 120.6 . . ? 
C21 C20 C19 122.0(3) . . ? 
C21 C20 H20 119.0 . . ? 
C19 C20 H20 119.0 . . ? 
C19 C14 C15 121.7(2) . . ? 
C19 C14 C18 131.6(3) . . ? 
C15 C14 C18 106.6(2) . . ? 
S1 C13 H13A 109.4 . . ? 
S1 C13 H13B 109.7 . . ? 
H13A C13 H13B 109.5 . . ? 
S1 C13 H13C 109.3 . . ? 
H13A C13 H13C 109.5 . . ? 
H13B C13 H13C 109.5 . . ? 
C14 C19 C20 116.4(2) . . ? 
C14 C19 C23 121.7(2) . . ? 
C20 C19 C23 121.9(3) . . ? 
C17 C18 C14 107.6(2) . . ? 
C17 C18 Mo1 67.65(15) . . ? 
C14 C18 Mo1 98.18(16) . . ? 
C17 C18 H18 126.3 . . ? 
C14 C18 H18 126.2 . . ? 
Mo1 C18 H18 101.4 . . ? 
C20 C21 C22 122.0(3) . . ? 
C20 C21 H21 119.1 . . ? 
C22 C21 H21 118.9 . . ? 
B4 B5 B6 107.6(2) . . ? 
B4 B5 B1 59.98(17) . . ? 
B6 B5 B1 59.75(18) . . ? 
B4 B5 B11 107.6(2) . . ? 
B6 B5 B11 60.22(18) . . ? 
B1 B5 B11 107.9(2) . . ? 
B4 B5 B10 61.15(17) . . ? 
B6 B5 B10 109.4(2) . . ? 
B1 B5 B10 110.0(2) . . ? 
B11 B5 B10 60.00(17) . . ? 
B4 B5 H5 122.0 . . ? 
B6 B5 H5 121.7 . . ? 
B1 B5 H5 121.5 . . ? 
B11 B5 H5 122.0 . . ? 
B10 B5 H5 120.0 . . ? 
C7 B11 B6 58.48(17) . . ? 
C7 B11 B5 103.6(2) . . ? 
B6 B11 B5 59.12(18) . . ? 
C7 B11 B10 106.1(2) . . ? 
B6 B11 B10 108.5(2) . . ? 
B5 B11 B10 60.01(17) . . ? 
C7 B11 Mo1 70.72(13) . . ? 
B6 B11 Mo1 126.46(19) . . ? 
B5 B11 Mo1 124.82(19) . . ? 
B10 B11 Mo1 69.02(14) . . ? 
C7 B11 H11 124.9 . . ? 
B6 B11 H11 118.7 . . ? 
B5 B11 H11 121.1 . . ? 
B10 B11 H11 122.8 . . ? 
Mo1 B11 H11 103.0 . . ? 
B3 B1 B2 60.02(17) . . ? 
B3 B1 B6 107.2(2) . . ? 
B2 B1 B6 59.98(18) . . ? 
B3 B1 B4 60.01(17) . . ? 
B2 B1 B4 108.1(2) . . ? 
B6 B1 B4 106.9(2) . . ? 
B3 B1 B5 107.1(2) . . ? 
B2 B1 B5 107.8(2) . . ? 
B6 B1 B5 59.52(18) . . ? 
B4 B1 B5 59.30(17) . . ? 
B3 B1 H1 122.0 . . ? 
B2 B1 H1 121.4 . . ? 
B6 B1 H1 122.5 . . ? 
B4 B1 H1 122.0 . . ? 
B5 B1 H1 122.3 . . ? 
C8 B3 B1 104.9(2) . . ? 
C8 B3 B2 59.31(16) . . ? 
B1 B3 B2 60.15(17) . . ? 
C8 B3 B4 104.2(2) . . ? 
B1 B3 B4 60.33(17) . . ? 
B2 B3 B4 108.5(2) . . ? 
C8 B3 B9 57.17(15) . . ? 
B1 B3 B9 107.5(2) . . ? 
B2 B3 B9 107.1(2) . . ? 
B4 B3 B9 59.95(16) . . ? 
C8 B3 H3 125.0 . . ? 
B1 B3 H3 122.4 . . ? 
B2 B3 H3 121.3 . . ? 
B4 B3 H3 122.2 . . ? 
B9 B3 H3 122.3 . . ? 
C17 C16 C15 107.2(2) . . ? 
C17 C16 Mo1 67.68(14) . . ? 
C15 C16 Mo1 98.64(16) . . ? 
C17 C16 H16 126.3 . . ? 
C15 C16 H16 126.4 . . ? 
Mo1 C16 H16 101.0 . . ? 
C19 C23 H23A 109.6 . . ? 
C19 C23 H23B 109.3 . . ? 
H23A C23 H23B 109.5 . . ? 
C19 C23 H23C 109.5 . . ? 
H23A C23 H23C 109.5 . . ? 
H23B C23 H23C 109.5 . . ? 
S1 C12 H12A 109.6 . . ? 
S1 C12 H12B 109.5 . . ? 
H12A C12 H12B 109.5 . . ? 
S1 C12 H12C 109.4 . . ? 
H12A C12 H12C 109.5 . . ? 
H12B C12 H12C 109.5 . . ? 
C22 C24 H24A 109.6 . . ? 
C22 C24 H24B 109.6 . . ? 
H24A C24 H24B 109.5 . . ? 
C22 C24 H24C 109.2 . . ? 
H24A C24 H24C 109.5 . . ? 
H24B C24 H24C 109.5 . . ? 
C7 B6 B5 104.3(2) . . ? 
C7 B6 B2 58.95(17) . . ? 
B5 B6 B2 108.8(2) . . ? 
C7 B6 B1 104.5(2) . . ? 
B5 B6 B1 60.74(18) . . ? 
B2 B6 B1 59.96(18) . . ? 
C7 B6 B11 57.81(16) . . ? 
B5 B6 B11 60.67(18) . . ? 
B2 B6 B11 108.3(2) . . ? 
B1 B6 B11 109.1(2) . . ? 
C7 B6 H6 125.5 . . ? 
B5 B6 H6 122.0 . . ? 
B2 B6 H6 120.9 . . ? 
B1 B6 H6 121.8 . . ? 
B11 B6 H6 121.4 . . ? 
 
_diffrn_measured_fraction_theta_max    0.982 
_diffrn_reflns_theta_full              27.36 
_diffrn_measured_fraction_theta_full   0.982 
_refine_diff_density_max    0.459 
_refine_diff_density_min   -0.520 
_refine_diff_density_rms    0.084 
#===END

 
data_19

_audit_creation_method            SHELXL-97 
_chemical_name_systematic 
; 
 ? 
; 
_chemical_name_common             ? 
_chemical_melting_point           ? 
_chemical_formula_moiety          'C20 H17 B Mo N6 O2' 
_chemical_formula_sum 
 'C20 H17 B Mo N6 O2' 
_chemical_formula_weight          480.15 
 
loop_ 
 _atom_type_symbol 
 _atom_type_description 
 _atom_type_scat_dispersion_real 
 _atom_type_scat_dispersion_imag 
 _atom_type_scat_source 
 'C'  'C'   0.0033   0.0016 
 'International Tables Vol C Tables 4.2.6.8 and 6.1.1.4' 
 'H'  'H'   0.0000   0.0000 
 'International Tables Vol C Tables 4.2.6.8 and 6.1.1.4' 
 'O'  'O'   0.0106   0.0060 
 'International Tables Vol C Tables 4.2.6.8 and 6.1.1.4' 
 'N'  'N'   0.0061   0.0033 
 'International Tables Vol C Tables 4.2.6.8 and 6.1.1.4' 
 'B'  'B'   0.0013   0.0007 
 'International Tables Vol C Tables 4.2.6.8 and 6.1.1.4' 
 'Mo'  'Mo'  -1.6832   0.6857 
 'International Tables Vol C Tables 4.2.6.8 and 6.1.1.4' 
 
_symmetry_cell_setting            'triclinic' 
_symmetry_space_group_name_H-M    'P -1' 
_symmetry_space_group_name_Hall   '-P 1' 
 
loop_ 
 _symmetry_equiv_pos_as_xyz 
 'x, y, z' 
 '-x, -y, -z' 
 
_cell_length_a                    8.1810(3) 
_cell_length_b                    9.3249(4) 
_cell_length_c                    14.5331(7) 
_cell_angle_alpha                 73.160(4) 
_cell_angle_beta                  83.761(3) 
_cell_angle_gamma                 66.326(3) 
_cell_volume                      971.81(8) 
_cell_formula_units_Z             2 
_cell_measurement_temperature     150(1) 
_cell_measurement_reflns_used     18104 
_cell_measurement_theta_min       1 
_cell_measurement_theta_max       27.5 
 
_exptl_crystal_description        'plate' 
_exptl_crystal_colour             'dark red' 
_exptl_crystal_size_max           0.30 
_exptl_crystal_size_mid           0.29 
_exptl_crystal_size_min           0.08 
_exptl_crystal_density_meas       ? 
_exptl_crystal_density_diffrn     1.641 
_exptl_crystal_density_method     'not measured' 
_exptl_crystal_F_000              484 
_exptl_absorpt_coefficient_mu     0.706 
# Absorption correction 

loop_
_exptl_crystal_face_index_h 
_exptl_crystal_face_index_k 
_exptl_crystal_face_index_l 
_exptl_crystal_face_perp_dist 
    1    0   -1  0.009
   -1    0    1  0.041
    1    0    1  0.088
   -1    0   -1  0.082
    0    1    1  0.080
    0   -1   -1  0.104


_exptl_absorpt_correction_type 'integration' 
_exptl_absorpt_correction_T_min  0.858
_exptl_absorpt_correction_T_max  0.971
_exptl_absorpt_process_details
;
Gaussian integration (Coppens, 1970)
;
 
_diffrn_ambient_temperature       150(1) 
_diffrn_radiation_wavelength      0.71073 
_diffrn_radiation_type            MoK\a 
_diffrn_radiation_source          'fine-focus sealed tube' 
_diffrn_radiation_monochromator   graphite 
_diffrn_measurement_device_type   'Bruker Nonius KappaCCD area detector' 
_diffrn_measurement_method        '\f and \w scans to fill the Ewald sphere'  
_diffrn_detector_area_resol_mean  9.091
_diffrn_standards_number          0 
_diffrn_standards_interval_count  ? 
_diffrn_standards_interval_time   ? 
_diffrn_standards_decay_%         ? 
_diffrn_reflns_number             18009 
_diffrn_reflns_av_R_equivalents   0.0450 
_diffrn_reflns_av_sigmaI/netI     0.0299 
_diffrn_reflns_limit_h_min        -10 
_diffrn_reflns_limit_h_max        10 
_diffrn_reflns_limit_k_min        -12 
_diffrn_reflns_limit_k_max        12 
_diffrn_reflns_limit_l_min        -18 
_diffrn_reflns_limit_l_max        18 
_diffrn_reflns_theta_min          1.46 
_diffrn_reflns_theta_max          27.49 
_reflns_number_total              4442 
_reflns_number_gt                 4040 
_reflns_threshold_expression      >2sigma(I) 
 
_computing_data_collection        
'COLLECT (Hooft, 1998) and DENZO (Otwinowski & Minor, 1997)'
_computing_cell_refinement        'COLLECT and DENZO' 
_computing_data_reduction         'COLLECT and DENZO' 
_computing_structure_solution     'SIR92 (Altomare et al., 1994)' 
_computing_structure_refinement   'SHELXL-97 (Sheldrick, 1997)' 
_computing_molecular_graphics     'PLATON (Spek, 2003)'
_computing_publication_material   'SHELXL-97 (Sheldrick, 2008)' 
 
_refine_special_details 
; 
 Refinement of F^2^ against ALL reflections.  The weighted R-factor wR and 
 goodness of fit S are based on F^2^, conventional R-factors R are based 
 on F, with F set to zero for negative F^2^. The threshold expression of 
 F^2^ > 2sigma(F^2^) is used only for calculating R-factors(gt) etc. and is 
 not relevant to the choice of reflections for refinement.  R-factors based 
 on F^2^ are statistically about twice as large as those based on F, and R- 
 factors based on ALL data will be even larger. 
; 
 
_refine_ls_structure_factor_coef  Fsqd  
_refine_ls_matrix_type            full 
_refine_ls_weighting_scheme       calc  
_refine_ls_weighting_details 
 'calc w=1/[\s^2^(Fo^2^)+(0.0241P)^2^+0.7571P] where P=(Fo^2^+2Fc^2^)/3' 
_atom_sites_solution_primary      direct 
_atom_sites_solution_secondary    difmap 
_atom_sites_solution_hydrogens    geom 
_refine_ls_hydrogen_treatment     constr 
_refine_ls_extinction_method      none 
_refine_ls_extinction_coef        ? 
_refine_ls_number_reflns          4442 
_refine_ls_number_parameters      271 
_refine_ls_number_restraints      0 
_refine_ls_R_factor_all           0.0310 
_refine_ls_R_factor_gt            0.0254 
_refine_ls_wR_factor_ref          0.0612 
_refine_ls_wR_factor_gt           0.0579 
_refine_ls_goodness_of_fit_ref    1.092 
_refine_ls_restrained_S_all       1.092 
_refine_ls_shift/su_max           0.002 
_refine_ls_shift/su_mean          0.000 
 
loop_ 
 _atom_site_label 
 _atom_site_type_symbol 
 _atom_site_fract_x 
 _atom_site_fract_y 
 _atom_site_fract_z 
 _atom_site_U_iso_or_equiv 
 _atom_site_adp_type 
 _atom_site_occupancy 
 _atom_site_symmetry_multiplicity 
 _atom_site_calc_flag 
 _atom_site_refinement_flags 
 _atom_site_disorder_assembly 
 _atom_site_disorder_group 
Mo1 Mo 0.18452(2) 0.138967(19) 0.750955(11) 0.01416(6) Uani 1 1 d . . . 
O2 O 0.4373(2) -0.22723(18) 0.79643(12) 0.0296(4) Uani 1 1 d . . . 
O1 O 0.0484(2) 0.0218(2) 0.60634(11) 0.0276(3) Uani 1 1 d . . . 
N5 N 0.3918(2) 0.1739(2) 0.64906(12) 0.0172(3) Uani 1 1 d . . . 
N6 N 0.4393(2) 0.3031(2) 0.63235(12) 0.0186(3) Uani 1 1 d . . . 
C19 C 0.0940(3) 0.0689(2) 0.66026(14) 0.0183(4) Uani 1 1 d . . . 
C15 C 0.4399(3) 0.3959(2) 0.85662(15) 0.0218(4) Uani 1 1 d . . . 
H15 H 0.4858 0.4763 0.8427 0.026 Uiso 1 1 d R . . 
C16 C 0.4994(3) 0.0792(2) 0.59499(14) 0.0196(4) Uani 1 1 d . . . 
H16 H 0.4964 -0.0183 0.5926 0.023 Uiso 1 1 d R . . 
C5 C 0.1187(3) -0.0053(2) 0.90550(14) 0.0192(4) Uani 1 1 d . . . 
H5 H 0.2275 -0.0348 0.9346 0.023 Uiso 1 1 d R . . 
N4 N 0.3665(2) 0.3590(2) 0.79244(12) 0.0188(3) Uani 1 1 d . . . 
N1 N 0.0472(2) 0.4056(2) 0.67834(12) 0.0202(3) Uani 1 1 d . . . 
C12 C 0.0363(3) 0.6534(3) 0.60399(15) 0.0258(4) Uani 1 1 d . . . 
H12 H 0.0690 0.7421 0.5814 0.031 Uiso 1 1 d R . . 
C13 C 0.3548(3) 0.1973(3) 0.93108(15) 0.0226(4) Uani 1 1 d . . . 
H13 H 0.3323 0.1169 0.9793 0.027 Uiso 1 1 d R . . 
C20 C 0.3445(3) -0.0914(2) 0.78318(14) 0.0197(4) Uani 1 1 d . . . 
C6 C 0.0989(3) -0.2837(3) 0.91965(14) 0.0215(4) Uani 1 1 d . . . 
H6 H 0.1960 -0.3471 0.9611 0.026 Uiso 1 1 d R . . 
N3 N 0.3141(2) 0.2347(2) 0.83780(12) 0.0188(3) Uani 1 1 d . . . 
N2 N 0.1390(2) 0.5050(2) 0.65804(12) 0.0203(3) Uani 1 1 d . . . 
C9 C -0.1954(3) -0.0918(3) 0.79382(16) 0.0274(5) Uani 1 1 d . . . 
H9 H -0.2923 -0.0285 0.7522 0.033 Uiso 1 1 d R . . 
C8 C -0.1426(3) -0.2607(3) 0.82656(16) 0.0286(5) Uani 1 1 d . . . 
H8 H -0.2061 -0.3101 0.8069 0.034 Uiso 1 1 d R . . 
C11 C -0.1262(3) 0.6520(3) 0.58862(17) 0.0303(5) Uani 1 1 d . . . 
H11 H -0.2230 0.7367 0.5534 0.036 Uiso 1 1 d R . . 
C1 C 0.0459(3) -0.1172(2) 0.88858(14) 0.0183(4) Uani 1 1 d . . . 
C18 C 0.5734(3) 0.2882(3) 0.56930(15) 0.0220(4) Uani 1 1 d . . . 
H18 H 0.6286 0.3615 0.5467 0.026 Uiso 1 1 d R . . 
C3 C -0.1149(3) 0.1481(3) 0.80211(15) 0.0232(4) Uani 1 1 d . . . 
H3 H -0.1821 0.2340 0.7523 0.028 Uiso 1 1 d R . . 
C17 C 0.6163(3) 0.1463(3) 0.54357(15) 0.0237(4) Uani 1 1 d . . . 
H17 H 0.7038 0.1049 0.5010 0.028 Uiso 1 1 d R . . 
C4 C -0.0086(3) 0.1572(3) 0.86899(14) 0.0213(4) Uani 1 1 d . . . 
H4 H -0.0195 0.2496 0.8858 0.026 Uiso 1 1 d R . . 
C2 C -0.1005(3) -0.0213(3) 0.82479(14) 0.0211(4) Uani 1 1 d . . . 
C7 C 0.0029(3) -0.3555(3) 0.88764(15) 0.0248(4) Uani 1 1 d . . . 
H7 H 0.0373 -0.4678 0.9076 0.030 Uiso 1 1 d R . . 
B1 B 0.3388(3) 0.4380(3) 0.68408(16) 0.0198(4) Uani 1 1 d . . . 
H1 H 0.3843 0.5248 0.6635 0.024 Uiso 1 1 d R . . 
C14 C 0.4349(3) 0.2956(3) 0.94590(16) 0.0245(4) Uani 1 1 d . . . 
H14 H 0.4764 0.2933 1.0036 0.029 Uiso 1 1 d R . . 
C10 C -0.1129(3) 0.4955(3) 0.63622(16) 0.0266(5) Uani 1 1 d . . . 
H10 H -0.2034 0.4582 0.6390 0.032 Uiso 1 1 d R . . 
 
loop_ 
 _atom_site_aniso_label 
 _atom_site_aniso_U_11 
 _atom_site_aniso_U_22 
 _atom_site_aniso_U_33 
 _atom_site_aniso_U_23 
 _atom_site_aniso_U_13 
 _atom_site_aniso_U_12 
Mo1 0.01487(8) 0.01389(9) 0.01210(8) -0.00298(6) 0.00090(5) -0.00453(6) 
O2 0.0227(8) 0.0162(7) 0.0422(10) -0.0041(7) 0.0031(7) -0.0032(6) 
O1 0.0297(8) 0.0376(9) 0.0225(8) -0.0130(7) 0.0019(6) -0.0171(7) 
N5 0.0182(8) 0.0173(8) 0.0155(8) -0.0049(6) -0.0001(6) -0.0059(6) 
N6 0.0218(8) 0.0192(8) 0.0152(8) -0.0033(6) 0.0023(6) -0.0096(7) 
C19 0.0164(9) 0.0204(10) 0.0158(9) -0.0035(8) 0.0035(7) -0.0066(8) 
C15 0.0224(10) 0.0190(10) 0.0258(11) -0.0090(8) -0.0003(8) -0.0076(8) 
C16 0.0187(9) 0.0222(10) 0.0170(9) -0.0075(8) 0.0006(7) -0.0057(8) 
C5 0.0207(9) 0.0246(10) 0.0132(9) -0.0046(8) 0.0024(7) -0.0108(8) 
N4 0.0213(8) 0.0162(8) 0.0195(8) -0.0049(6) 0.0014(7) -0.0081(7) 
N1 0.0227(8) 0.0171(8) 0.0180(8) -0.0032(7) -0.0015(7) -0.0056(7) 
C12 0.0336(12) 0.0156(10) 0.0220(10) -0.0016(8) 0.0002(9) -0.0058(9) 
C13 0.0257(10) 0.0219(10) 0.0187(10) -0.0033(8) -0.0024(8) -0.0086(8) 
C20 0.0177(9) 0.0240(10) 0.0189(9) -0.0053(8) 0.0026(7) -0.0106(8) 
C6 0.0216(10) 0.0236(10) 0.0170(9) -0.0033(8) 0.0021(8) -0.0084(8) 
N3 0.0210(8) 0.0183(8) 0.0159(8) -0.0029(6) 0.0005(6) -0.0076(7) 
N2 0.0254(9) 0.0143(8) 0.0191(8) -0.0025(6) 0.0015(7) -0.0074(7) 
C9 0.0228(10) 0.0400(13) 0.0194(10) -0.0024(9) -0.0014(8) -0.0157(10) 
C8 0.0315(12) 0.0402(13) 0.0252(11) -0.0111(10) 0.0045(9) -0.0245(10) 
C11 0.0321(12) 0.0195(11) 0.0274(11) 0.0007(9) -0.0073(9) -0.0010(9) 
C1 0.0195(9) 0.0238(10) 0.0119(9) -0.0045(7) 0.0034(7) -0.0098(8) 
C18 0.0219(10) 0.0274(11) 0.0186(10) -0.0052(8) 0.0020(8) -0.0126(8) 
C3 0.0171(9) 0.0244(10) 0.0210(10) -0.0019(8) 0.0043(8) -0.0049(8) 
C17 0.0222(10) 0.0305(11) 0.0193(10) -0.0098(9) 0.0045(8) -0.0100(9) 
C4 0.0252(10) 0.0216(10) 0.0174(9) -0.0075(8) 0.0094(8) -0.0102(8) 
C2 0.0181(9) 0.0262(10) 0.0152(9) -0.0022(8) 0.0038(7) -0.0081(8) 
C7 0.0303(11) 0.0259(11) 0.0215(10) -0.0075(9) 0.0074(8) -0.0151(9) 
B1 0.0255(11) 0.0168(10) 0.0186(11) -0.0050(9) 0.0025(9) -0.0102(9) 
C14 0.0244(10) 0.0264(11) 0.0230(10) -0.0094(9) -0.0038(8) -0.0073(9) 
C10 0.0251(11) 0.0251(11) 0.0258(11) -0.0063(9) -0.0045(9) -0.0051(9) 
 
_geom_special_details 
; 
 All esds (except the esd in the dihedral angle between two l.s. planes) 
 are estimated using the full covariance matrix.  The cell esds are taken 
 into account individually in the estimation of esds in distances, angles 
 and torsion angles; correlations between esds in cell parameters are only 
 used when they are defined by crystal symmetry.  An approximate (isotropic) 
 treatment of cell esds is used for estimating esds involving l.s. planes. 
; 
 
loop_ 
 _geom_bond_atom_site_label_1 
 _geom_bond_atom_site_label_2 
 _geom_bond_distance 
 _geom_bond_site_symmetry_2 
 _geom_bond_publ_flag 
Mo1 C19 1.953(2) . ? 
Mo1 C20 1.960(2) . ? 
Mo1 N5 2.1891(17) . ? 
Mo1 C4 2.198(2) . ? 
Mo1 N1 2.2475(17) . ? 
Mo1 N3 2.2838(17) . ? 
Mo1 C5 2.390(2) . ? 
Mo1 C3 2.457(2) . ? 
O2 C20 1.156(3) . ? 
O1 C19 1.158(2) . ? 
N5 C16 1.342(3) . ? 
N5 N6 1.359(2) . ? 
N6 C18 1.340(3) . ? 
N6 B1 1.552(3) . ? 
C15 N4 1.350(3) . ? 
C15 C14 1.370(3) . ? 
C15 H15 0.9300 . ? 
C16 C17 1.385(3) . ? 
C16 H16 0.9300 . ? 
C5 C4 1.432(3) . ? 
C5 C1 1.478(3) . ? 
C5 H5 0.9300 . ? 
N4 N3 1.363(2) . ? 
N4 B1 1.531(3) . ? 
N1 C10 1.337(3) . ? 
N1 N2 1.364(2) . ? 
C12 N2 1.348(3) . ? 
C12 C11 1.377(3) . ? 
C12 H12 0.9300 . ? 
C13 N3 1.342(3) . ? 
C13 C14 1.394(3) . ? 
C13 H13 0.9300 . ? 
C6 C1 1.377(3) . ? 
C6 C7 1.401(3) . ? 
C6 H6 0.9301 . ? 
N2 B1 1.544(3) . ? 
C9 C2 1.376(3) . ? 
C9 C8 1.399(3) . ? 
C9 H9 0.9300 . ? 
C8 C7 1.384(3) . ? 
C8 H8 0.9300 . ? 
C11 C10 1.387(3) . ? 
C11 H11 0.9300 . ? 
C1 C2 1.412(3) . ? 
C18 C17 1.378(3) . ? 
C18 H18 0.9300 . ? 
C3 C4 1.414(3) . ? 
C3 C2 1.475(3) . ? 
C3 H3 0.9300 . ? 
C17 H17 0.9300 . ? 
C4 H4 0.9300 . ? 
C7 H7 0.9300 . ? 
B1 H1 0.9800 . ? 
C14 H14 0.9300 . ? 
C10 H10 0.9300 . ? 
 
loop_ 
 _geom_angle_atom_site_label_1 
 _geom_angle_atom_site_label_2 
 _geom_angle_atom_site_label_3 
 _geom_angle 
 _geom_angle_site_symmetry_1 
 _geom_angle_site_symmetry_3 
 _geom_angle_publ_flag 
C19 Mo1 C20 80.69(8) . . ? 
C19 Mo1 N5 90.35(7) . . ? 
C20 Mo1 N5 84.97(7) . . ? 
C19 Mo1 C4 105.40(8) . . ? 
C20 Mo1 C4 104.23(8) . . ? 
N5 Mo1 C4 162.74(7) . . ? 
C19 Mo1 N1 94.58(7) . . ? 
C20 Mo1 N1 164.45(7) . . ? 
N5 Mo1 N1 80.24(6) . . ? 
C4 Mo1 N1 91.29(7) . . ? 
C19 Mo1 N3 171.32(7) . . ? 
C20 Mo1 N3 100.49(7) . . ? 
N5 Mo1 N3 81.22(6) . . ? 
C4 Mo1 N3 82.74(7) . . ? 
N1 Mo1 N3 82.03(6) . . ? 
C19 Mo1 C5 104.35(8) . . ? 
C20 Mo1 C5 68.64(8) . . ? 
N5 Mo1 C5 146.71(6) . . ? 
C4 Mo1 C5 36.06(7) . . ? 
N1 Mo1 C5 126.89(7) . . ? 
N3 Mo1 C5 83.98(6) . . ? 
C19 Mo1 C3 71.60(8) . . ? 
C20 Mo1 C3 106.33(8) . . ? 
N5 Mo1 C3 156.31(7) . . ? 
C4 Mo1 C3 34.81(7) . . ? 
N1 Mo1 C3 85.90(7) . . ? 
N3 Mo1 C3 115.91(7) . . ? 
C5 Mo1 C3 55.77(7) . . ? 
C16 N5 N6 106.28(16) . . ? 
C16 N5 Mo1 130.33(14) . . ? 
N6 N5 Mo1 123.35(12) . . ? 
C18 N6 N5 109.67(16) . . ? 
C18 N6 B1 130.80(18) . . ? 
N5 N6 B1 119.53(16) . . ? 
O1 C19 Mo1 176.76(17) . . ? 
N4 C15 C14 108.59(18) . . ? 
N4 C15 H15 125.8 . . ? 
C14 C15 H15 125.6 . . ? 
N5 C16 C17 110.60(18) . . ? 
N5 C16 H16 124.7 . . ? 
C17 C16 H16 124.7 . . ? 
C4 C5 C1 107.65(17) . . ? 
C4 C5 Mo1 64.65(11) . . ? 
C1 C5 Mo1 106.54(12) . . ? 
C4 C5 H5 126.0 . . ? 
C1 C5 H5 126.3 . . ? 
Mo1 C5 H5 97.0 . . ? 
C15 N4 N3 109.97(16) . . ? 
C15 N4 B1 128.53(17) . . ? 
N3 N4 B1 121.50(16) . . ? 
C10 N1 N2 106.02(17) . . ? 
C10 N1 Mo1 132.86(15) . . ? 
N2 N1 Mo1 120.54(12) . . ? 
N2 C12 C11 108.4(2) . . ? 
N2 C12 H12 125.9 . . ? 
C11 C12 H12 125.7 . . ? 
N3 C13 C14 110.79(19) . . ? 
N3 C13 H13 124.6 . . ? 
C14 C13 H13 124.6 . . ? 
O2 C20 Mo1 175.74(18) . . ? 
C1 C6 C7 118.6(2) . . ? 
C1 C6 H6 120.8 . . ? 
C7 C6 H6 120.7 . . ? 
C13 N3 N4 105.83(16) . . ? 
C13 N3 Mo1 134.51(14) . . ? 
N4 N3 Mo1 119.65(12) . . ? 
C12 N2 N1 109.78(17) . . ? 
C12 N2 B1 128.49(19) . . ? 
N1 N2 B1 121.17(16) . . ? 
C2 C9 C8 118.4(2) . . ? 
C2 C9 H9 120.7 . . ? 
C8 C9 H9 120.9 . . ? 
C7 C8 C9 121.1(2) . . ? 
C7 C8 H8 119.5 . . ? 
C9 C8 H8 119.5 . . ? 
C12 C11 C10 104.77(19) . . ? 
C12 C11 H11 127.7 . . ? 
C10 C11 H11 127.5 . . ? 
C6 C1 C2 120.66(19) . . ? 
C6 C1 C5 132.44(19) . . ? 
C2 C1 C5 106.85(18) . . ? 
N6 C18 C17 108.83(19) . . ? 
N6 C18 H18 125.5 . . ? 
C17 C18 H18 125.6 . . ? 
C4 C3 C2 108.21(18) . . ? 
C4 C3 Mo1 62.55(11) . . ? 
C2 C3 Mo1 105.51(13) . . ? 
C4 C3 H3 125.9 . . ? 
C2 C3 H3 125.9 . . ? 
Mo1 C3 H3 99.4 . . ? 
C18 C17 C16 104.62(18) . . ? 
C18 C17 H17 127.8 . . ? 
C16 C17 H17 127.6 . . ? 
C3 C4 C5 105.65(18) . . ? 
C3 C4 Mo1 82.64(12) . . ? 
C5 C4 Mo1 79.29(12) . . ? 
C3 C4 H4 127.1 . . ? 
C5 C4 H4 127.3 . . ? 
Mo1 C4 H4 105.2 . . ? 
C9 C2 C1 120.7(2) . . ? 
C9 C2 C3 132.4(2) . . ? 
C1 C2 C3 106.82(18) . . ? 
C8 C7 C6 120.5(2) . . ? 
C8 C7 H7 119.8 . . ? 
C6 C7 H7 119.7 . . ? 
N4 B1 N2 110.01(17) . . ? 
N4 B1 N6 107.62(16) . . ? 
N2 B1 N6 107.28(16) . . ? 
N4 B1 H1 110.7 . . ? 
N2 B1 H1 110.6 . . ? 
N6 B1 H1 110.5 . . ? 
C15 C14 C13 104.82(18) . . ? 
C15 C14 H14 127.5 . . ? 
C13 C14 H14 127.6 . . ? 
N1 C10 C11 111.0(2) . . ? 
N1 C10 H10 124.4 . . ? 
C11 C10 H10 124.6 . . ? 
 
_diffrn_measured_fraction_theta_max    0.994 
_diffrn_reflns_theta_full              27.49 
_diffrn_measured_fraction_theta_full   0.994 
_refine_diff_density_max    0.547 
_refine_diff_density_min   -0.644 
_refine_diff_density_rms    0.079 
#===END

 
data_20 

_audit_creation_method            SHELXL-97 
_chemical_name_systematic 
; 
 ? 
; 
_chemical_name_common             ? 
_chemical_melting_point           ? 
_chemical_formula_moiety          'C26 H29 B Mo N6 O2, C4 H10 O'
_chemical_formula_sum 
 'C30 H39 B Mo N6 O3' 
_chemical_formula_weight          638.42 
 
loop_ 
 _atom_type_symbol 
 _atom_type_description 
 _atom_type_scat_dispersion_real 
 _atom_type_scat_dispersion_imag 
 _atom_type_scat_source 
 'C'  'C'   0.0033   0.0016 
 'International Tables Vol C Tables 4.2.6.8 and 6.1.1.4' 
 'H'  'H'   0.0000   0.0000 
 'International Tables Vol C Tables 4.2.6.8 and 6.1.1.4' 
 'O'  'O'   0.0106   0.0060 
 'International Tables Vol C Tables 4.2.6.8 and 6.1.1.4' 
 'N'  'N'   0.0061   0.0033 
 'International Tables Vol C Tables 4.2.6.8 and 6.1.1.4' 
 'B'  'B'   0.0013   0.0007 
 'International Tables Vol C Tables 4.2.6.8 and 6.1.1.4' 
 'Mo'  'Mo'  -1.6832   0.6857 
 'International Tables Vol C Tables 4.2.6.8 and 6.1.1.4' 
 
_symmetry_cell_setting            'triclinic' 
_symmetry_space_group_name_H-M    'P -1'
_symmetry_space_group_name_Hall   '-P 1' 
 
loop_ 
 _symmetry_equiv_pos_as_xyz 
 'x, y, z' 
 '-x, -y, -z' 
 
_cell_length_a                    10.2500(5) 
_cell_length_b                    12.0811(7) 
_cell_length_c                    13.7160(5) 
_cell_angle_alpha                 67.442(4) 
_cell_angle_beta                  79.796(3) 
_cell_angle_gamma                 76.465(5) 
_cell_volume                      1517.72(14) 
_cell_formula_units_Z             2 
_cell_measurement_temperature     150(1) 
_cell_measurement_reflns_used     29123 
_cell_measurement_theta_min       1 
_cell_measurement_theta_max       27.5 
 
_exptl_crystal_description        'plate' 
_exptl_crystal_colour             'dark red' 
_exptl_crystal_size_max           0.53 
_exptl_crystal_size_mid           0.35 
_exptl_crystal_size_min           0.13 
_exptl_crystal_density_meas       ? 
_exptl_crystal_density_diffrn     1.397 
_exptl_crystal_density_method     'not measured' 
_exptl_crystal_F_000              664 
_exptl_absorpt_coefficient_mu     0.473 
# Absorption correction 

loop_
_exptl_crystal_face_index_h 
_exptl_crystal_face_index_k 
_exptl_crystal_face_index_l 
_exptl_crystal_face_perp_dist 
   -1   -1    0  0.075
    1    1    0  0.141
    0   -1    0  0.129
    0    1    0  0.129
    0    0   -1  0.035
    0    0    1  0.064


_exptl_absorpt_correction_type 'integration' 
_exptl_absorpt_correction_T_min  0.887
_exptl_absorpt_correction_T_max  0.962
_exptl_absorpt_process_details
;
Gaussian integration (Coppens, 1970)
;
 
_diffrn_ambient_temperature       150(1) 
_diffrn_radiation_wavelength      0.71073 
_diffrn_radiation_type            MoK\a 
_diffrn_radiation_source          'fine-focus sealed tube' 
_diffrn_radiation_monochromator   graphite 
_diffrn_measurement_device_type   'Bruker Nonius KappaCCD area detector' 
_diffrn_measurement_method        '\f and \w scans to fill the Ewald sphere'  
_diffrn_detector_area_resol_mean  9.091
_diffrn_standards_number          0 
_diffrn_standards_interval_count  ? 
_diffrn_standards_interval_time   ? 
_diffrn_standards_decay_%         ? 
_diffrn_reflns_number             29035 
_diffrn_reflns_av_R_equivalents   0.0319 
_diffrn_reflns_av_sigmaI/netI     0.0221 
_diffrn_reflns_limit_h_min        -13 
_diffrn_reflns_limit_h_max        13 
_diffrn_reflns_limit_k_min        -15 
_diffrn_reflns_limit_k_max        15 
_diffrn_reflns_limit_l_min        -17 
_diffrn_reflns_limit_l_max        17 
_diffrn_reflns_theta_min          1.86 
_diffrn_reflns_theta_max          27.50 
_reflns_number_total              6923 
_reflns_number_gt                 6335 
_reflns_threshold_expression      >2sigma(I) 
 
_computing_data_collection        
'COLLECT (Hooft, 1998) and DENZO (Otwinowski & Minor, 1997)'
_computing_cell_refinement        'COLLECT and DENZO' 
_computing_data_reduction         'COLLECT and DENZO' 
_computing_structure_solution     'SIR92 (Altomare et al., 1994)' 
_computing_structure_refinement   'SHELXL-97 (Sheldrick, 1997)' 
_computing_molecular_graphics     'PLATON (Spek, 2003)'
_computing_publication_material   'SHELXL-97 (Sheldrick, 2008)' 
 
_refine_special_details 
;
 Refinement of F^2^ against ALL reflections.  The weighted R-factor wR and 
 goodness of fit S are based on F^2^, conventional R-factors R are based 
 on F, with F set to zero for negative F^2^. The threshold expression of 
 F^2^ > 2sigma(F^2^) is used only for calculating R-factors(gt) etc. and is 
 not relevant to the choice of reflections for refinement.  R-factors based 
 on F^2^ are statistically about twice as large as those based on F, and R- 
 factors based on ALL data will be even larger. 
; 
 
_refine_ls_structure_factor_coef  Fsqd  
_refine_ls_matrix_type            full 
_refine_ls_weighting_scheme       calc  
_refine_ls_weighting_details 
 'calc w=1/[\s^2^(Fo^2^)+(0.0216P)^2^+1.3148P] where P=(Fo^2^+2Fc^2^)/3' 
_atom_sites_solution_primary      direct 
_atom_sites_solution_secondary    difmap 
_atom_sites_solution_hydrogens    geom 
_refine_ls_hydrogen_treatment     constr 
_refine_ls_extinction_method      none 
_refine_ls_extinction_coef        ? 
_refine_ls_number_reflns          6923 
_refine_ls_number_parameters      370 
_refine_ls_number_restraints      0 
_refine_ls_R_factor_all           0.0307 
_refine_ls_R_factor_gt            0.0252 
_refine_ls_wR_factor_ref          0.0631 
_refine_ls_wR_factor_gt           0.0592 
_refine_ls_goodness_of_fit_ref    1.095 
_refine_ls_restrained_S_all       1.095 
_refine_ls_shift/su_max           0.002 
_refine_ls_shift/su_mean          0.000 
 
loop_ 
 _atom_site_label 
 _atom_site_type_symbol 
 _atom_site_fract_x 
 _atom_site_fract_y 
 _atom_site_fract_z 
 _atom_site_U_iso_or_equiv 
 _atom_site_adp_type 
 _atom_site_occupancy 
 _atom_site_symmetry_multiplicity 
 _atom_site_calc_flag 
 _atom_site_refinement_flags 
 _atom_site_disorder_assembly 
 _atom_site_disorder_group 
Mo1 Mo 0.720499(13) 0.272842(12) 0.048047(11) 0.01368(5) Uani 1 1 d . . . 
O3 O 0.79024(15) -0.15978(14) 0.43650(11) 0.0336(3) Uani 1 1 d . . . 
C26 C 0.86444(17) 0.25116(15) -0.05979(14) 0.0192(3) Uani 1 1 d . . . 
N2 N 0.57197(14) 0.27868(13) 0.19778(11) 0.0179(3) Uani 1 1 d . . . 
N3 N 0.75384(14) 0.47852(13) 0.12561(11) 0.0176(3) Uani 1 1 d . . . 
O1 O 0.72459(15) 0.00138(12) 0.07924(12) 0.0316(3) Uani 1 1 d . . . 
N4 N 0.77861(14) 0.44869(12) 0.03591(11) 0.0162(3) Uani 1 1 d . . . 
N1 N 0.59986(14) 0.34030(13) 0.25541(11) 0.0180(3) Uani 1 1 d . . . 
O2 O 0.94953(13) 0.23394(12) -0.12266(11) 0.0270(3) Uani 1 1 d . . . 
C25 C 0.71844(17) 0.10122(16) 0.07058(14) 0.0209(3) Uani 1 1 d . . . 
N5 N 0.84798(14) 0.26549(13) 0.24061(11) 0.0175(3) Uani 1 1 d . . . 
C15 C 0.78422(17) 0.58972(16) 0.10272(15) 0.0217(4) Uani 1 1 d . . . 
N6 N 0.86377(14) 0.20818(13) 0.16827(11) 0.0172(3) Uani 1 1 d . . . 
C5 C 0.62953(18) 0.41016(16) -0.11924(14) 0.0212(3) Uani 1 1 d . . . 
H5 H 0.6707 0.4756 -0.1306 0.025 Uiso 1 1 d R . . 
C10 C 0.50432(18) 0.33833(16) 0.33767(14) 0.0217(4) Uani 1 1 d . . . 
C22 C 0.97142(17) 0.11703(15) 0.19284(14) 0.0198(3) Uani 1 1 d . . . 
C1 C 0.65299(18) 0.33655(17) -0.18673(14) 0.0213(3) Uani 1 1 d . . . 
C20 C 0.94333(17) 0.20947(16) 0.30905(14) 0.0210(3) Uani 1 1 d . . . 
C11 C 0.41144(18) 0.27491(17) 0.33349(14) 0.0227(4) Uani 1 1 d . . . 
H11 H 0.3339 0.2596 0.3794 0.027 Uiso 1 1 d R . . 
C13 C 0.5100(2) 0.3932(2) 0.41758(15) 0.0301(4) Uani 1 1 d . . . 
H13A H 0.5855 0.3485 0.4578 0.036 Uiso 1 1 d R . . 
H13B H 0.4284 0.3894 0.4645 0.036 Uiso 1 1 d R . . 
H13C H 0.5203 0.4767 0.3816 0.036 Uiso 1 1 d R . . 
C3 C 0.53546(17) 0.24339(17) -0.02677(14) 0.0217(3) Uani 1 1 d . . . 
H3 H 0.5051 0.1820 0.0326 0.026 Uiso 1 1 d R . . 
C17 C 0.82883(16) 0.54106(15) -0.04150(14) 0.0191(3) Uani 1 1 d . . . 
C2 C 0.59376(18) 0.23300(17) -0.12919(14) 0.0220(4) Uani 1 1 d . . . 
C12 C 0.45736(17) 0.23760(16) 0.24692(14) 0.0202(3) Uani 1 1 d . . . 
C4 C 0.53431(17) 0.36411(16) -0.03410(14) 0.0205(3) Uani 1 1 d . . . 
H4 H 0.4809 0.4050 0.0084 0.025 Uiso 1 1 d R . . 
C16 C 0.83185(18) 0.63183(16) -0.00269(15) 0.0231(4) Uani 1 1 d . . . 
H16 H 0.8604 0.7057 -0.0406 0.028 Uiso 1 1 d R . . 
B1 B 0.73658(19) 0.37887(18) 0.23503(15) 0.0185(4) Uani 1 1 d . . . 
H1 H 0.7455 0.4091 0.2899 0.022 Uiso 1 1 d R . . 
C6 C 0.7185(2) 0.3514(2) -0.28636(15) 0.0314(4) Uani 1 1 d . . . 
H6 H 0.7610 0.4178 -0.3237 0.038 Uiso 1 1 d R . . 
C9 C 0.5961(2) 0.14630(19) -0.17253(17) 0.0324(4) Uani 1 1 d . . . 
H9 H 0.5571 0.0779 -0.1345 0.039 Uiso 1 1 d R . . 
C21 C 1.02260(18) 0.11526(17) 0.28084(15) 0.0233(4) Uani 1 1 d . . . 
H21 H 1.0958 0.0609 0.3143 0.028 Uiso 1 1 d R . . 
C24 C 1.0253(2) 0.03390(18) 0.13196(17) 0.0293(4) Uani 1 1 d . . . 
H24A H 0.9570 -0.0099 0.1347 0.035 Uiso 1 1 d R . . 
H24B H 1.1030 -0.0228 0.1626 0.035 Uiso 1 1 d R . . 
H24C H 1.0503 0.0810 0.0595 0.035 Uiso 1 1 d R . . 
C19 C 0.88021(18) 0.54463(17) -0.15128(14) 0.0239(4) Uani 1 1 d . . . 
H19A H 0.8905 0.4649 -0.1543 0.029 Uiso 1 1 d R . . 
H19B H 0.9659 0.5704 -0.1703 0.029 Uiso 1 1 d R . . 
H19C H 0.8175 0.6011 -0.1999 0.029 Uiso 1 1 d R . . 
C8 C 0.6589(2) 0.1645(2) -0.27518(19) 0.0405(5) Uani 1 1 d . . . 
H8 H 0.6598 0.1084 -0.3066 0.049 Uiso 1 1 d R . . 
C23 C 0.9546(2) 0.2484(2) 0.39756(16) 0.0309(4) Uani 1 1 d . . . 
H23A H 0.9662 0.3319 0.3693 0.037 Uiso 1 1 d R . . 
H23B H 1.0312 0.1979 0.4343 0.037 Uiso 1 1 d R . . 
H23C H 0.8744 0.2404 0.4460 0.037 Uiso 1 1 d R . . 
C7 C 0.7194(2) 0.2639(2) -0.33008(17) 0.0410(6) Uani 1 1 d . . . 
H7 H 0.7614 0.2734 -0.3980 0.049 Uiso 1 1 d R . . 
C14 C 0.3940(2) 0.15890(19) 0.21549(16) 0.0283(4) Uani 1 1 d . . . 
H14A H 0.3471 0.2076 0.1539 0.034 Uiso 1 1 d R . . 
H14B H 0.3314 0.1211 0.2728 0.034 Uiso 1 1 d R . . 
H14C H 0.4626 0.0971 0.1998 0.034 Uiso 1 1 d R . . 
C18 C 0.7647(2) 0.64939(18) 0.18275(17) 0.0296(4) Uani 1 1 d . . . 
H18A H 0.6770 0.6437 0.2208 0.036 Uiso 1 1 d R . . 
H18B H 0.7722 0.7336 0.1473 0.036 Uiso 1 1 d R . . 
H18C H 0.8324 0.6093 0.2316 0.036 Uiso 1 1 d R . . 
C30 C 0.8978(3) -0.3518(3) 0.4266(2) 0.0601(8) Uani 1 1 d . . . 
H30A H 0.9772 -0.3392 0.4460 0.072 Uiso 1 1 d R . . 
H30B H 0.9234 -0.3962 0.3792 0.072 Uiso 1 1 d R . . 
H30C H 0.8472 -0.3973 0.4892 0.072 Uiso 1 1 d R . . 
C28 C 0.7102(2) -0.0429(2) 0.39211(18) 0.0437(6) Uani 1 1 d . . . 
H28A H 0.6224 -0.0516 0.3818 0.052 Uiso 1 1 d R . . 
H28B H 0.7530 0.0018 0.3237 0.052 Uiso 1 1 d R . . 
C27 C 0.6944(3) 0.0244(2) 0.4651(2) 0.0477(6) Uani 1 1 d . . . 
H27A H 0.6550 -0.0217 0.5334 0.057 Uiso 1 1 d R . . 
H27B H 0.6368 0.1021 0.4372 0.057 Uiso 1 1 d R . . 
H27C H 0.7811 0.0363 0.4721 0.057 Uiso 1 1 d R . . 
C29 C 0.8135(3) -0.2313(3) 0.3723(2) 0.0575(7) Uani 1 1 d . . . 
H29A H 0.8590 -0.1901 0.3039 0.069 Uiso 1 1 d R . . 
H29B H 0.7281 -0.2434 0.3606 0.069 Uiso 1 1 d R . . 
 
loop_ 
 _atom_site_aniso_label 
 _atom_site_aniso_U_11 
 _atom_site_aniso_U_22 
 _atom_site_aniso_U_33 
 _atom_site_aniso_U_23 
 _atom_site_aniso_U_13 
 _atom_site_aniso_U_12 
Mo1 0.01282(7) 0.01327(7) 0.01552(7) -0.00607(5) -0.00202(5) -0.00140(5) 
O3 0.0318(7) 0.0404(8) 0.0237(7) -0.0075(6) -0.0048(6) -0.0025(6) 
C26 0.0197(8) 0.0156(8) 0.0230(9) -0.0066(7) -0.0059(7) -0.0025(6) 
N2 0.0161(7) 0.0201(7) 0.0176(7) -0.0071(6) -0.0019(5) -0.0030(5) 
N3 0.0170(7) 0.0172(7) 0.0219(7) -0.0100(6) -0.0045(5) -0.0019(5) 
O1 0.0358(8) 0.0180(6) 0.0427(8) -0.0122(6) -0.0047(6) -0.0051(6) 
N4 0.0153(6) 0.0163(7) 0.0175(7) -0.0066(5) -0.0027(5) -0.0023(5) 
N1 0.0176(7) 0.0190(7) 0.0176(7) -0.0079(6) -0.0017(5) -0.0013(5) 
O2 0.0227(6) 0.0291(7) 0.0286(7) -0.0148(6) 0.0057(5) -0.0022(5) 
C25 0.0184(8) 0.0216(9) 0.0224(9) -0.0077(7) -0.0023(7) -0.0032(7) 
N5 0.0166(7) 0.0202(7) 0.0172(7) -0.0079(6) -0.0039(5) -0.0024(5) 
C15 0.0178(8) 0.0186(8) 0.0321(10) -0.0111(7) -0.0088(7) -0.0015(6) 
N6 0.0173(7) 0.0168(7) 0.0181(7) -0.0072(6) -0.0027(5) -0.0022(5) 
C5 0.0240(9) 0.0197(8) 0.0211(8) -0.0067(7) -0.0083(7) -0.0026(7) 
C10 0.0196(8) 0.0232(9) 0.0172(8) -0.0055(7) -0.0016(6) 0.0026(7) 
C22 0.0171(8) 0.0170(8) 0.0233(9) -0.0056(7) -0.0030(6) -0.0014(6) 
C1 0.0200(8) 0.0255(9) 0.0190(8) -0.0088(7) -0.0061(6) -0.0006(7) 
C20 0.0183(8) 0.0251(9) 0.0188(8) -0.0053(7) -0.0044(6) -0.0049(7) 
C11 0.0187(8) 0.0253(9) 0.0181(8) -0.0030(7) 0.0014(6) -0.0031(7) 
C13 0.0298(10) 0.0389(11) 0.0230(9) -0.0169(8) -0.0002(8) -0.0006(8) 
C3 0.0190(8) 0.0259(9) 0.0221(9) -0.0088(7) -0.0035(7) -0.0061(7) 
C17 0.0139(8) 0.0182(8) 0.0230(8) -0.0045(7) -0.0046(6) -0.0017(6) 
C2 0.0202(8) 0.0244(9) 0.0245(9) -0.0120(7) -0.0075(7) -0.0002(7) 
C12 0.0171(8) 0.0201(8) 0.0192(8) -0.0023(7) -0.0020(6) -0.0033(6) 
C4 0.0166(8) 0.0237(9) 0.0222(8) -0.0118(7) -0.0061(6) 0.0041(7) 
C16 0.0207(8) 0.0165(8) 0.0324(10) -0.0060(7) -0.0068(7) -0.0053(7) 
B1 0.0171(9) 0.0213(9) 0.0199(9) -0.0111(8) -0.0024(7) -0.0017(7) 
C6 0.0282(10) 0.0420(12) 0.0209(9) -0.0093(8) -0.0029(8) -0.0035(9) 
C9 0.0387(11) 0.0289(10) 0.0366(11) -0.0177(9) -0.0140(9) -0.0013(9) 
C21 0.0175(8) 0.0234(9) 0.0251(9) -0.0047(7) -0.0071(7) 0.0005(7) 
C24 0.0257(9) 0.0257(9) 0.0372(11) -0.0160(8) -0.0101(8) 0.0076(8) 
C19 0.0214(9) 0.0222(9) 0.0235(9) -0.0033(7) -0.0001(7) -0.0051(7) 
C8 0.0470(13) 0.0447(13) 0.0406(12) -0.0312(11) -0.0175(10) 0.0088(11) 
C23 0.0292(10) 0.0424(12) 0.0245(10) -0.0150(9) -0.0101(8) -0.0018(9) 
C7 0.0371(12) 0.0624(16) 0.0247(10) -0.0255(11) -0.0069(9) 0.0087(11) 
C14 0.0258(9) 0.0337(10) 0.0271(10) -0.0094(8) 0.0025(7) -0.0149(8) 
C18 0.0316(10) 0.0251(9) 0.0403(11) -0.0189(9) -0.0085(8) -0.0043(8) 
C30 0.0646(18) 0.0682(19) 0.0608(18) -0.0429(16) -0.0201(14) 0.0074(15) 
C28 0.0389(12) 0.0452(13) 0.0305(11) 0.0050(10) -0.0075(9) -0.0054(10) 
C27 0.0459(14) 0.0283(11) 0.0511(15) 0.0019(10) -0.0056(11) 0.0000(10) 
C29 0.0726(19) 0.0679(19) 0.0352(13) -0.0235(13) -0.0162(13) -0.0019(15) 
 
_geom_special_details 
; 
 All esds (except the esd in the dihedral angle between two l.s. planes) 
 are estimated using the full covariance matrix.  The cell esds are taken 
 into account individually in the estimation of esds in distances, angles 
 and torsion angles; correlations between esds in cell parameters are only 
 used when they are defined by crystal symmetry.  An approximate (isotropic) 
 treatment of cell esds is used for estimating esds involving l.s. planes. 
; 
 
loop_ 
 _geom_bond_atom_site_label_1 
 _geom_bond_atom_site_label_2 
 _geom_bond_distance 
 _geom_bond_site_symmetry_2 
 _geom_bond_publ_flag 
Mo1 C26 1.9432(18) . ? 
Mo1 C25 1.9803(18) . ? 
Mo1 N6 2.1951(14) . ? 
Mo1 C4 2.2251(16) . ? 
Mo1 N4 2.2763(14) . ? 
Mo1 N2 2.3439(14) . ? 
Mo1 C5 2.4494(17) . ? 
Mo1 C3 2.4622(17) . ? 
O3 C29 1.411(3) . ? 
O3 C28 1.418(3) . ? 
C26 O2 1.155(2) . ? 
N2 C12 1.348(2) . ? 
N2 N1 1.3754(19) . ? 
N3 C15 1.356(2) . ? 
N3 N4 1.3765(19) . ? 
N3 B1 1.534(2) . ? 
O1 C25 1.153(2) . ? 
N4 C17 1.343(2) . ? 
N1 C10 1.353(2) . ? 
N1 B1 1.525(2) . ? 
N5 C20 1.350(2) . ? 
N5 N6 1.3812(19) . ? 
N5 B1 1.551(2) . ? 
C15 C16 1.374(3) . ? 
C15 C18 1.492(2) . ? 
N6 C22 1.350(2) . ? 
C5 C4 1.406(3) . ? 
C5 C1 1.469(2) . ? 
C5 H5 0.9301 . ? 
C10 C11 1.375(3) . ? 
C10 C13 1.497(3) . ? 
C22 C21 1.390(2) . ? 
C22 C24 1.494(2) . ? 
C1 C6 1.376(3) . ? 
C1 C2 1.409(3) . ? 
C20 C21 1.378(3) . ? 
C20 C23 1.490(2) . ? 
C11 C12 1.396(2) . ? 
C11 H11 0.9300 . ? 
C13 H13A 0.9600 . ? 
C13 H13B 0.9599 . ? 
C13 H13C 0.9600 . ? 
C3 C4 1.420(2) . ? 
C3 C2 1.466(2) . ? 
C3 H3 0.9300 . ? 
C17 C16 1.399(2) . ? 
C17 C19 1.492(2) . ? 
C2 C9 1.383(3) . ? 
C12 C14 1.488(3) . ? 
C4 H4 0.9301 . ? 
C16 H16 0.9301 . ? 
B1 H1 0.9800 . ? 
C6 C7 1.399(3) . ? 
C6 H6 0.9300 . ? 
C9 C8 1.397(3) . ? 
C9 H9 0.9300 . ? 
C21 H21 0.9300 . ? 
C24 H24A 0.9600 . ? 
C24 H24B 0.9599 . ? 
C24 H24C 0.9600 . ? 
C19 H19A 0.9600 . ? 
C19 H19B 0.9600 . ? 
C19 H19C 0.9600 . ? 
C8 C7 1.372(4) . ? 
C8 H8 0.9301 . ? 
C23 H23A 0.9599 . ? 
C23 H23B 0.9600 . ? 
C23 H23C 0.9600 . ? 
C7 H7 0.9300 . ? 
C14 H14A 0.9600 . ? 
C14 H14B 0.9600 . ? 
C14 H14C 0.9601 . ? 
C18 H18A 0.9600 . ? 
C18 H18B 0.9599 . ? 
C18 H18C 0.9600 . ? 
C30 C29 1.492(4) . ? 
C30 H30A 0.9600 . ? 
C30 H30B 0.9600 . ? 
C30 H30C 0.9601 . ? 
C28 C27 1.482(4) . ? 
C28 H28A 0.9699 . ? 
C28 H28B 0.9701 . ? 
C27 H27A 0.9600 . ? 
C27 H27B 0.9600 . ? 
C27 H27C 0.9600 . ? 
C29 H29A 0.9700 . ? 
C29 H29B 0.9699 . ? 
 
loop_ 
 _geom_angle_atom_site_label_1 
 _geom_angle_atom_site_label_2 
 _geom_angle_atom_site_label_3 
 _geom_angle 
 _geom_angle_site_symmetry_1 
 _geom_angle_site_symmetry_3 
 _geom_angle_publ_flag 
C26 Mo1 C25 81.45(7) . . ? 
C26 Mo1 N6 91.39(6) . . ? 
C25 Mo1 N6 89.21(6) . . ? 
C26 Mo1 C4 106.76(7) . . ? 
C25 Mo1 C4 99.76(7) . . ? 
N6 Mo1 C4 160.68(6) . . ? 
C26 Mo1 N4 91.59(6) . . ? 
C25 Mo1 N4 164.84(6) . . ? 
N6 Mo1 N4 77.44(5) . . ? 
C4 Mo1 N4 95.13(6) . . ? 
C26 Mo1 N2 170.73(6) . . ? 
C25 Mo1 N2 95.65(6) . . ? 
N6 Mo1 N2 79.73(5) . . ? 
C4 Mo1 N2 82.37(6) . . ? 
N4 Mo1 N2 89.09(5) . . ? 
C26 Mo1 C5 76.05(7) . . ? 
C25 Mo1 C5 110.59(7) . . ? 
N6 Mo1 C5 154.19(6) . . ? 
C4 Mo1 C5 34.59(6) . . ? 
N4 Mo1 C5 80.42(5) . . ? 
N2 Mo1 C5 113.16(5) . . ? 
C26 Mo1 C3 97.93(6) . . ? 
C25 Mo1 C3 65.05(7) . . ? 
N6 Mo1 C3 150.70(6) . . ? 
C4 Mo1 C3 34.81(6) . . ? 
N4 Mo1 C3 129.61(6) . . ? 
N2 Mo1 C3 88.72(5) . . ? 
C5 Mo1 C3 54.82(6) . . ? 
C29 O3 C28 113.80(18) . . ? 
O2 C26 Mo1 177.54(15) . . ? 
C12 N2 N1 105.61(13) . . ? 
C12 N2 Mo1 137.07(12) . . ? 
N1 N2 Mo1 117.30(10) . . ? 
C15 N3 N4 109.99(14) . . ? 
C15 N3 B1 127.85(15) . . ? 
N4 N3 B1 119.74(13) . . ? 
C17 N4 N3 106.26(13) . . ? 
C17 N4 Mo1 136.07(11) . . ? 
N3 N4 Mo1 117.58(10) . . ? 
C10 N1 N2 110.67(14) . . ? 
C10 N1 B1 128.35(15) . . ? 
N2 N1 B1 119.89(13) . . ? 
O1 C25 Mo1 175.62(16) . . ? 
C20 N5 N6 109.59(14) . . ? 
C20 N5 B1 128.76(14) . . ? 
N6 N5 B1 121.63(13) . . ? 
N3 C15 C16 107.71(15) . . ? 
N3 C15 C18 123.00(17) . . ? 
C16 C15 C18 129.29(17) . . ? 
C22 N6 N5 106.56(13) . . ? 
C22 N6 Mo1 134.28(12) . . ? 
N5 N6 Mo1 119.14(10) . . ? 
C4 C5 C1 108.05(15) . . ? 
C4 C5 Mo1 63.94(9) . . ? 
C1 C5 Mo1 105.49(11) . . ? 
C4 C5 H5 125.9 . . ? 
C1 C5 H5 126.0 . . ? 
Mo1 C5 H5 98.3 . . ? 
N1 C10 C11 107.36(16) . . ? 
N1 C10 C13 123.21(17) . . ? 
C11 C10 C13 129.38(17) . . ? 
N6 C22 C21 109.40(15) . . ? 
N6 C22 C24 123.92(16) . . ? 
C21 C22 C24 126.68(16) . . ? 
C6 C1 C2 120.43(18) . . ? 
C6 C1 C5 132.71(18) . . ? 
C2 C1 C5 106.85(15) . . ? 
N5 C20 C21 107.87(15) . . ? 
N5 C20 C23 123.40(16) . . ? 
C21 C20 C23 128.73(16) . . ? 
C10 C11 C12 106.21(15) . . ? 
C10 C11 H11 126.8 . . ? 
C12 C11 H11 126.9 . . ? 
C10 C13 H13A 109.3 . . ? 
C10 C13 H13B 109.7 . . ? 
H13A C13 H13B 109.5 . . ? 
C10 C13 H13C 109.4 . . ? 
H13A C13 H13C 109.5 . . ? 
H13B C13 H13C 109.5 . . ? 
C4 C3 C2 107.71(16) . . ? 
C4 C3 Mo1 63.43(9) . . ? 
C2 C3 Mo1 105.48(11) . . ? 
C4 C3 H3 126.0 . . ? 
C2 C3 H3 126.3 . . ? 
Mo1 C3 H3 98.5 . . ? 
N4 C17 C16 109.88(16) . . ? 
N4 C17 C19 125.45(15) . . ? 
C16 C17 C19 124.62(16) . . ? 
C9 C2 C1 121.02(18) . . ? 
C9 C2 C3 132.05(19) . . ? 
C1 C2 C3 106.91(15) . . ? 
N2 C12 C11 110.13(15) . . ? 
N2 C12 C14 124.28(16) . . ? 
C11 C12 C14 125.53(16) . . ? 
C5 C4 C3 106.26(15) . . ? 
C5 C4 Mo1 81.46(10) . . ? 
C3 C4 Mo1 81.76(10) . . ? 
C5 C4 H4 126.7 . . ? 
C3 C4 H4 127.0 . . ? 
Mo1 C4 H4 104.4 . . ? 
C15 C16 C17 106.12(16) . . ? 
C15 C16 H16 127.0 . . ? 
C17 C16 H16 126.9 . . ? 
N1 B1 N3 111.67(14) . . ? 
N1 B1 N5 108.20(14) . . ? 
N3 B1 N5 108.99(14) . . ? 
N1 B1 H1 109.4 . . ? 
N3 B1 H1 109.3 . . ? 
N5 B1 H1 109.3 . . ? 
C1 C6 C7 118.2(2) . . ? 
C1 C6 H6 121.0 . . ? 
C7 C6 H6 120.9 . . ? 
C2 C9 C8 118.0(2) . . ? 
C2 C9 H9 121.0 . . ? 
C8 C9 H9 121.0 . . ? 
C20 C21 C22 106.57(15) . . ? 
C20 C21 H21 126.8 . . ? 
C22 C21 H21 126.7 . . ? 
C22 C24 H24A 109.2 . . ? 
C22 C24 H24B 109.6 . . ? 
H24A C24 H24B 109.5 . . ? 
C22 C24 H24C 109.5 . . ? 
H24A C24 H24C 109.5 . . ? 
H24B C24 H24C 109.5 . . ? 
C17 C19 H19A 109.7 . . ? 
C17 C19 H19B 109.3 . . ? 
H19A C19 H19B 109.5 . . ? 
C17 C19 H19C 109.5 . . ? 
H19A C19 H19C 109.5 . . ? 
H19B C19 H19C 109.5 . . ? 
C7 C8 C9 120.90(19) . . ? 
C7 C8 H8 119.6 . . ? 
C9 C8 H8 119.5 . . ? 
C20 C23 H23A 109.4 . . ? 
C20 C23 H23B 109.3 . . ? 
H23A C23 H23B 109.5 . . ? 
C20 C23 H23C 109.8 . . ? 
H23A C23 H23C 109.5 . . ? 
H23B C23 H23C 109.5 . . ? 
C8 C7 C6 121.4(2) . . ? 
C8 C7 H7 119.2 . . ? 
C6 C7 H7 119.4 . . ? 
C12 C14 H14A 109.6 . . ? 
C12 C14 H14B 109.3 . . ? 
H14A C14 H14B 109.5 . . ? 
C12 C14 H14C 109.5 . . ? 
H14A C14 H14C 109.5 . . ? 
H14B C14 H14C 109.5 . . ? 
C15 C18 H18A 109.4 . . ? 
C15 C18 H18B 109.4 . . ? 
H18A C18 H18B 109.5 . . ? 
C15 C18 H18C 109.6 . . ? 
H18A C18 H18C 109.5 . . ? 
H18B C18 H18C 109.5 . . ? 
C29 C30 H30A 109.5 . . ? 
C29 C30 H30B 109.2 . . ? 
H30A C30 H30B 109.5 . . ? 
C29 C30 H30C 109.7 . . ? 
H30A C30 H30C 109.5 . . ? 
H30B C30 H30C 109.5 . . ? 
O3 C28 C27 109.06(18) . . ? 
O3 C28 H28A 109.8 . . ? 
C27 C28 H28A 109.8 . . ? 
O3 C28 H28B 109.9 . . ? 
C27 C28 H28B 109.9 . . ? 
H28A C28 H28B 108.3 . . ? 
C28 C27 H27A 109.5 . . ? 
C28 C27 H27B 109.5 . . ? 
H27A C27 H27B 109.5 . . ? 
C28 C27 H27C 109.4 . . ? 
H27A C27 H27C 109.5 . . ? 
H27B C27 H27C 109.5 . . ? 
O3 C29 C30 109.2(2) . . ? 
O3 C29 H29A 110.1 . . ? 
C30 C29 H29A 110.0 . . ? 
O3 C29 H29B 109.7 . . ? 
C30 C29 H29B 109.6 . . ? 
H29A C29 H29B 108.2 . . ? 
 
_diffrn_measured_fraction_theta_max    0.994 
_diffrn_reflns_theta_full              27.50 
_diffrn_measured_fraction_theta_full   0.994 
_refine_diff_density_max    0.677 
_refine_diff_density_min   -0.555 
_refine_diff_density_rms    0.062
